# Supplementary material for: Low back pain management in primary healthcare: findings from a scoping review on models of care
Source: PubMed Central journal article supplement — BMJ Open. 2024 May 15;14(5):e079276. doi: 10.1136/bmjopen-2023-079276 (PMC11097853; doi:10.1136/bmjopen-2023-079276), 2024-05-15
Supplement: bmjopen-2023-079276.draft_revisions.pdf [file bmjopen-2023-079276.draft_revisions.pdf]

# BMJ Open

BMJ Open is committed to open peer review. As part of this commitment we make the peer review history of every article we publish publicly available.

When an article is published we post the peer reviewers' comments and the authors' responses online. We also post the versions of the paper that were used during peer review. These are the versions that the peer review comments apply to.

The versions of the paper that follow are the versions that were submitted during the peer review process. They are not the versions of record or the final published versions. They should not be cited or distributed as the published version of this manuscript.

BMJ Open is an open access journal and the full, final, typeset and author-corrected version of record of the manuscript is available on our site with no access controls, subscription charges or pay-per-view fees (<http://bmjopen.bmj.com>).

If you have any questions on BMJ Open's open peer review process please email [info.bmjopen@bmj.com](mailto:info.bmjopen@bmj.com)

# BMJ Open

## Low Back Pain Management in Primary Healthcare: Findings from a Scoping Review on Models of Care

|                               |                                                                                                                                                                                                                                                                                                                                                                                                                                                                                                                                                                                                                                                                                                                                                                                                                                                                                                                                                                                                                                                                                                                                                                                                                                                                                                                                                                                                                                                                                                        |
|-------------------------------|--------------------------------------------------------------------------------------------------------------------------------------------------------------------------------------------------------------------------------------------------------------------------------------------------------------------------------------------------------------------------------------------------------------------------------------------------------------------------------------------------------------------------------------------------------------------------------------------------------------------------------------------------------------------------------------------------------------------------------------------------------------------------------------------------------------------------------------------------------------------------------------------------------------------------------------------------------------------------------------------------------------------------------------------------------------------------------------------------------------------------------------------------------------------------------------------------------------------------------------------------------------------------------------------------------------------------------------------------------------------------------------------------------------------------------------------------------------------------------------------------------|
| Journal:                      | <i>BMJ Open</i>                                                                                                                                                                                                                                                                                                                                                                                                                                                                                                                                                                                                                                                                                                                                                                                                                                                                                                                                                                                                                                                                                                                                                                                                                                                                                                                                                                                                                                                                                        |
| Manuscript ID                 | bmjopen-2023-079276                                                                                                                                                                                                                                                                                                                                                                                                                                                                                                                                                                                                                                                                                                                                                                                                                                                                                                                                                                                                                                                                                                                                                                                                                                                                                                                                                                                                                                                                                    |
| Article Type:                 | Original research                                                                                                                                                                                                                                                                                                                                                                                                                                                                                                                                                                                                                                                                                                                                                                                                                                                                                                                                                                                                                                                                                                                                                                                                                                                                                                                                                                                                                                                                                      |
| Date Submitted by the Author: | 31-Aug-2023                                                                                                                                                                                                                                                                                                                                                                                                                                                                                                                                                                                                                                                                                                                                                                                                                                                                                                                                                                                                                                                                                                                                                                                                                                                                                                                                                                                                                                                                                            |
| Complete List of Authors:     | <p>Duarte, Susana; Comprehensive Health Research Center (CHRC), National School of Public Health, Universidade NOVA de Lisboa; Physiotherapy Department, School of Health Care, Polytechnic Institute of Setúbal</p> <p>Moniz, Alexandre; Comprehensive Health Research Center (CHRC), NOVA Medical School   Faculdade de Ciências Médicas, NMS   FCM, Universidade NOVA de Lisboa; EpiDoc Unit, NOVA Medical School   Faculdade de Ciências Médicas, NMS   FCM, Universidade Nova de Lisboa</p> <p>Costa, Daniela; Physiotherapy Department, Escola Superior de Saúde de Alcoitão, Santa Casa da Misericórdia de Lisboa; Physiotherapy Department, School of Health Care, Polytechnic Institute of Setúbal</p> <p>Donato, Helena; Centro Hospitalar e Universitário de Coimbra EPE, Documentation and Scientific Information Service; University of Coimbra Faculty of Medicine,</p> <p>Heleno, B; Universidade Nova de Lisboa, Family Medicine Unit; Comprehensive Health Research Center (CHRC), NOVA Medical School   Faculdade de Ciências Médicas, NMS   FCM, Universidade NOVA de Lisboa,</p> <p>Aguiar, Pedro; Universidade Nova de Lisboa, National School of Public Health; Comprehensive Health Research Center (CHRC), National School of Public Health, Universidade NOVA de Lisboa</p> <p>Cruz, Eduardo; Escola Superior de Saúde - Instituto Politécnico de Setúbal, Setúbal, Department of Physiotherapy; Comprehensive Health Research Center (CHRC), Universidade NOVA de Lisboa</p> |
| Keywords:                     | Back pain < ORTHOPAEDIC & TRAUMA SURGERY, Musculoskeletal disorders < ORTHOPAEDIC & TRAUMA SURGERY, PAIN MANAGEMENT, Primary Health Care, Primary Care < Primary Health Care, PUBLIC HEALTH                                                                                                                                                                                                                                                                                                                                                                                                                                                                                                                                                                                                                                                                                                                                                                                                                                                                                                                                                                                                                                                                                                                                                                                                                                                                                                            |
|                               |                                                                                                                                                                                                                                                                                                                                                                                                                                                                                                                                                                                                                                                                                                                                                                                                                                                                                                                                                                                                                                                                                                                                                                                                                                                                                                                                                                                                                                                                                                        |

SCHOLARONE™  
Manuscripts

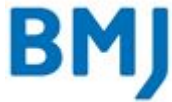

I, the Submitting Author has the right to grant and does grant on behalf of all authors of the Work (as defined in the below author licence), an exclusive licence and/or a non-exclusive licence for contributions from authors who are: i) UK Crown employees; ii) where BMJ has agreed a CC-BY licence shall apply, and/or iii) in accordance with the terms applicable for US Federal Government officers or employees acting as part of their official duties; on a worldwide, perpetual, irrevocable, royalty-free basis to BMJ Publishing Group Ltd ("BMJ") its licensees and where the relevant Journal is co-owned by BMJ to the co-owners of the Journal, to publish the Work in this journal and any other BMJ products and to exploit all rights, as set out in our [licence](#).

The Submitting Author accepts and understands that any supply made under these terms is made by BMJ to the Submitting Author unless you are acting as an employee on behalf of your employer or a postgraduate student of an affiliated institution which is paying any applicable article publishing charge ("APC") for Open Access articles. Where the Submitting Author wishes to make the Work available on an Open Access basis (and intends to pay the relevant APC), the terms of reuse of such Open Access shall be governed by a Creative Commons licence – details of these licences and which [Creative Commons](#) licence will apply to this Work are set out in our licence referred to above.

Other than as permitted in any relevant BMJ Author's Self Archiving Policies, I confirm this Work has not been accepted for publication elsewhere, is not being considered for publication elsewhere and does not duplicate material already published. I confirm all authors consent to publication of this Work and authorise the granting of this licence.

## Title Page

**Low Back Pain Management in Primary Healthcare: Findings from a Scoping Review on Models of Care**Susana Tinoco Duarte<sup>1,2\*</sup>,Alexandre Moniz<sup>3,4</sup>,Daniela Costa<sup>2,5</sup>,Helena Donato<sup>6,7</sup>,Bruno Heleno<sup>3</sup>,Pedro Aguiar<sup>1,8</sup>,Eduardo B Cruz<sup>1,2</sup>

<sup>1</sup>Comprehensive Health Research Center (CHRC), National School of Public Health, Universidade NOVA de Lisboa, Lisbon, Portugal;

<sup>2</sup>Physiotherapy Department, School of Health Care, Polytechnic Institute of Setúbal, Setúbal, Portugal;

<sup>3</sup>Comprehensive Health Research Center (CHRC), NOVA Medical School | Faculdade de Ciências Médicas, NMS | FCM, Universidade NOVA de Lisboa, Lisbon, Portugal;

<sup>4</sup>EpiDoc Unit, NOVA Medical School | Faculdade de Ciências Médicas, NMS | FCM, Universidade Nova de Lisboa, Lisbon, Portugal;

<sup>5</sup>Physiotherapy Department, Escola Superior de Saúde de Alcoitão, Santa Casa da Misericórdia de Lisboa, Portugal;

<sup>6</sup>Documentation and Scientific Information Service, Centro Hospitalar e Universitário de Coimbra EPE, Coimbra, Portugal;

<sup>7</sup>Faculty of Medicine, University of Coimbra, Coimbra, Portugal;

<sup>8</sup>National School of Public Health, Universidade NOVA de Lisboa, Lisbon, Portugal;

**\*Corresponding author**

Susana Patrícia Tinoco da Silva Duarte

[sp.duarte@ensp.unl.pt](mailto:sp.duarte@ensp.unl.pt)

Comprehensive Health Research Center (CHRC)

NOVA National School of Public Health

Avenida Padre Cruz

Lisboa, 1600-560

Portugal

**Total manuscript word count: 5378 words**

1  
2  
3 37 Manuscript

4  
5 38 **Low Back Pain Management in Primary Healthcare: Findings from a Scoping**  
6  
7 39 **Review on Models of Care**

8  
9 40

10  
11 41 **ABSTRACT**

12  
13 42 **Introduction:** Models of care (MoCs) describe evidence-informed healthcare that should be delivered to  
14  
15 43 patients. Several MoCs have been implemented for low back pain (LBP) in the last years to reduce  
16  
17 44 evidence-to-practice gaps and increase the effectiveness and sustainability of healthcare services.

18  
19 45 **Objective:** To synthesize research evidence regarding the core characteristics, context features and key  
20  
21 46 common elements of MoCs implemented in primary healthcare for the management of LBP.

22  
23 47 **Design:** Scoping review.

24  
25 48 **Data sources:** Searches on MEDLINE(Pubmed), EMBASE, Cochrane Central Register of Controlled  
26  
27 49 Trials, PEDro, Scopus, Web of Science and grey literature databases were conducted.

28  
29 50 **Eligibility criteria:** Eligible records included MoCs implemented for adult LBP patients in primary  
30  
31 51 healthcare settings.

32  
33 52 **Data extraction and synthesis:** Data extraction was carried out independently by two researchers and  
34  
35 53 included a summary of the studies, the identification of the MoCs and respective key elements, such as  
36  
37 54 levels of care, settings, health professionals involved, type of care delivered and core components of the  
38  
39 55 interventions. Findings were investigated through a descriptive qualitative content analysis using a  
40  
41 56 deductive approach.

42  
43 57 **Results:** Twenty-nine studies reporting 11 MoCs were included. All MoCs were implemented in high-  
44  
45 58 income countries and had clear objectives. Most MoCs included a stratified care approach. Assessment  
46  
47 59 of LBP patients typically occurred in primary healthcare, while care delivery usually took place in  
48  
49 60 community-based settings or outpatient clinics. Care provided by general practitioners and  
50  
51 61 physiotherapists was reported in most of the studies. Education and exercise were the most common  
52  
53 62 health interventions, but intervention content, follow-ups and discharge criteria were not fully reported.

54  
55 63 **Conclusions:** MoCs for LBP in primary healthcare share relevant key elements, but report of  
56  
57 64 interventions is heterogenous. This study provided a comprehensive understanding of the characteristics  
58  
59 65 of the existing MoCs, which may contribute to inform future research implementation studies and the  
60  
61 66 development of health policies and services for LBP.

62  
63 67 **Keywords:** Low back pain; models of care; primary healthcare; implementation science

64  
65 68 **Registration:** Open Science Framework Registries (<https://osf.io/rsd8x>)

66  
67 69

1  
2  
3 70 **ARTICLE SUMMARY**  
4  
5

6 71 **Strengths and limitations of this study**  
7  
8

- 9 72 - To the best of our knowledge, this is the first study aiming to map the available evidence regarding  
10 73 the core characteristics, context features and key elements of MoCs implemented in primary  
11 74 healthcare for the management of LBP;  
12  
13 75 - To safeguard the transparency and methodological rigour of this study, it followed the Joanna  
14 76 Briggs Institute Methodological Guidelines and Preferred Reporting Items for Systematic Reviews  
15 76 and Meta-Analysis extension for Scoping Reviews;  
16 77  
17 78 - One limitation of this review is potential selection bias due to search strategies and language  
18 79 restrictions, as well as uncertainty in MoC terminologies;  
19  
20 80 - Strategies to overcome potential limitations included the use of a broad search strategy across  
21 81 databases, an overinclusion approach during articles screening and regular team discussions  
22 82 during data extraction and analysis;  
23  
24 83 - This study offers a comprehensive and detailed understanding of the key characteristics of the  
25 84 MoCs implemented for the management of LBP in primary healthcare, which may inform  
26 85 researchers, health professionals and policy makers in the development of future implementation  
27 86 research studies on this topic.  
28  
29  
30

31  
32 87  
33  
34  
35  
36  
37  
38  
39  
40  
41  
42  
43  
44  
45  
46  
47  
48  
49  
50  
51  
52  
53  
54  
55  
56  
57  
58  
59  
60

## 88 INTRODUCTION

89 Low back pain (LBP) is a significant global public health concern, acknowledged as the leading contributor  
90 to disability worldwide. In 2020, 619 million (95% UI 554–694) people reported having this health condition  
91 and prevalence projections suggest it will escalate to 843 million (95% UI 759–933) by 2050, an increase  
92 in total cases of 36.4%(1). It is recognized that the burdensomeness of LBP is related to long-term  
93 disability and poor health-related quality of life(2–4), associated with more medical costs and utilization of  
94 healthcare resources, such as medication, medical appointments, imaging and physiotherapy(2,5–7).  
95 Thus, the impact of LBP goes beyond the individual burden, representing a growing demand for society  
96 and healthcare systems.

97 Although care delivery may vary between health systems, primary healthcare is recognized as the  
98 appropriate setting to manage LBP(8,9), which is already one of the most common reasons for general  
99 practice consultations worldwide(8,10). Accompanying the estimates of the rising prevalence of LBP, it is  
100 also expected a significant increase in primary healthcare workload in the upcoming years(9), so there is  
101 an urgent need to develop efficient and sustainable solutions to face these healthcare challenges.

102 Additionally, evidence shows there is a present gap between the recommended practice for LBP and the  
103 care provided in real-world contexts(9). Current patterns of care may vary between settings and lack  
104 alignment with clinical practice guideline recommendations, which succinctly endorses the delivery of  
105 nonpharmacological interventions, such as education, exercise and manual therapy(8,11–13). However,  
106 many LBP patients receive unnecessary low-value care, which does not align with quality  
107 standards(14,15), leads to poor clinical outcomes(4,16) and waste healthcare resources(17–19).  
108 Therefore, system-level reform strategies are necessary to overcome these evidence-to-practice gaps  
109 and to promote the delivery of high-quality care to LBP patients (9,17,20).

110 The implementation of models of care (MoCs) is one of the most auspicious strategies suggested to  
111 increase the responsiveness of health systems to the impact of LBP. A Model of Care (MoC) is a person-  
112 centered and principle-based guide that describes evidence-informed best practice care for particular  
113 health conditions, outlining what care should be provided and how to implement it(21,22). Its principles  
114 are in line with the quadruple aim of value-based care, targeting better health outcomes, better patient  
115 and health professional experiences and improved use of healthcare resources(17,22). MoCs usually  
116 reflect regional or national health policies that are implemented as health services at local settings(21,23).  
117 When implemented locally, a MoC include the key core components from the system-level framework,  
118 but other elements should be adapted to meet the specific context and needs(17). The operationalization  
119 of a MoC for local service delivery is usually designated as ‘model of service delivery’(17).

120 Several MoCs have been implemented for LBP patients over the last few years in different countries(24–  
121 52). Commonly, these MoCs deliver care through stepped or stratified approaches, supporting the  
122 decision-making process. In stepped care, all patients are initially offered the same treatment options and  
123 more complex care is only proposed if they have not recovered sufficiently, while, in risk-stratified MoCs,  
124 patients are stratified according to their prognosis at initial assessment and treatment is targeted to patient  
125 subgroups, with more comprehensive care offered to those at risk of poor outcomes(53).

1  
2  
3 126 Although some MoCs reveal promising results regarding their effectiveness and cost-  
4 127 effectiveness(24,32,50), they are very heterogeneous in terms of their characteristics, making it difficult  
5  
6 128 to assess the suitability of a MoC to a given context over another. These characteristics include, but are  
7  
8 129 not limited to, the target population, clinical pathways, levels of care and health professionals involved,  
9 130 type of care (stepped/stratified approaches), health interventions and context features.

10  
11 131 To our knowledge, there are no published reviews with the specific purpose of mapping the available  
12 132 evidence on the MoCs implemented for LBP patients. Therefore, this scoping review aims to  
13 133 systematically synthesize the literature on MoCs implemented for the management of LBP patients in  
14 134 primary healthcare, examining the extent and range of available research and summarizing the findings.  
15 135 It is expected that this knowledge would provide a broader overview of their nature, diversity and key  
16 136 common elements. Likewise, the results of this study may help policy makers, health administrators and  
17 137 managers, advocacy organizations, clinicians, researchers, funders and LBP patients to inform the  
18 138 development of health services and future research on the implementation of health interventions.

19  
20  
21  
22  
23 139

## 24 25 140 **METHODS**

26  
27 141 A scoping review was deemed the most appropriate study design to answer the research questions as it  
28 142 aims to map the available evidence and identify characteristics or factors related to an emerging and  
29 143 complex concept(54,55). The uncertainty regarding the evidence sources, methodologies and amount  
30 144 and quality of available data driven the choice of this approach.

31  
32  
33 145 This study was conducted in accordance with the Joanna Briggs Institute (JBI) scoping review guidance  
34 146 and the Preferred Reporting Items for Systematic Reviews and Meta-Analyses extension for scoping  
35 147 reviews (PRISMA-ScR) (Supplementary File 1). The protocol was registered within the Open Science  
36 148 Framework Registries (<https://osf.io/rsd8x>) and it was published elsewhere(56). Patients and/or the public  
37 149 were not involved in the design, or conduct, or reporting, or dissemination plans of this research.

40  
41 150

### 42 43 151 **Research questions**

44  
45 152 Four research questions were framed in the protocol of this study(56):

- 46  
47 153 - Which MoCs have been implemented for patients with LBP attending primary healthcare  
48 154 services?  
49  
50 155 - What are the key elements of the MoCs?  
51 156 - What are the patient-, system- and implementation-related outcomes of the MoCs and how have  
52 157 they been measured?  
53  
54 158 - What are the context-specific factors contemplated in the implementation of the MoCs at macro  
55 159 (system), meso (organizational), micro (patient) and multiple levels?

56  
57 160 However, during the processes of data extraction and analysis, it has become clear that the complexity  
58 161 of the topic and richness of the available data justify a rigorous description and interpretation of the



1  
2  
3 162 findings. Therefore, this paper will answer to the first two research questions, while findings concerning  
4 163 the last two will be reported in a subsequent paper.

5  
6 164

7  
8 165 ***Inclusion criteria***

9  
10 166 Eligibility criteria was defined through the PCC framework(54,55). A detail description of the population,  
11 167 concept, context and evidence sources is provided in the protocol of this review(56).

12  
13 168 Target population include LBP patients, with or without radicular pain, of any duration. Individuals with  
14 169 LBP related to specific causes, such as pregnancy, fracture, inflammatory diseases, infection or other  
15 170 serious pathologies were excluded. MoCs that were not specifically directed to LBP and included broader  
16 171 populations, such as “musculoskeletal pain” or “spinal pain”, were excluded.

17  
18 172 MoC was the concept of interest and it entails what care should be provided and how it should be delivered  
19 173 in a local setting, including processes of care, organization of providers and management of  
20 174 services(21,22,57). Based on *A Framework to Evaluate Musculoskeletal Models of Care*(21), operational  
21 175 criteria were defined to differentiate a MoC from other types of interventions. Only one criterion was added  
22 176 to those that were published in the protocol, which is the MoC is not digital, which include telemedicine,  
23 177 telerehabilitation, web-based programs and/or mobile apps.

24  
25 178 Regarding the context, this review included MoCs implemented in primary healthcare(57). MoCs were  
26 179 included if they were developed in primary healthcare or in other levels of healthcare delivery, as long as  
27 180 they include primary care interventions in the clinical pathway.

28  
29 181 Additionally, this study covered a broad spectrum of evidence sources, including peer-reviewed primary  
30 182 research and grey literature(54,55). The first comprised quantitative, qualitative and mixed methods study  
31 183 designs, while the latter encompassed organizational reports, policy documents, research reports, pilot  
32 184 studies, dissertations and theses. Reviews, meta-analysis, guidelines, books, book chapters, editorials,  
33 185 expert opinions, conference proceedings and presentations were excluded.

34  
35 186

36  
37 187 ***Search Strategy***

38  
39 188 A comprehensive search was conducted on MEDLINE(PubMed), EMBASE, Cochrane Central Register  
40 189 of Controlled Trials, PEDro, Scopus and Web of Science. Grey literature databases included the Grey  
41 190 Literature Report, MedNar Search Engine and the World Health Organization Institutional Repository for  
42 191 Information Sharing (WHO-IRIS). Hand searching was also carried out in relevant peer-reviewed journals  
43 192 and websites of important organizations(58). The list of hand searched journals and organizations is  
44 193 provided in Figure 1. Additional studies were identified by screening the reference lists of relevant reviews.

45  
46 194

47 195 **[Please insert Figure 1 – PRISMA flow diagram showing the identification, screening, eligibility  
48 196 and inclusion process of the articles]**

49  
50 197

1  
2  
3 198 An initial limited search of PubMed was undertaken in May 2021, using the PCC framework, so the key  
4 199 search terms “low back pain”, “model of care” and “primary care” were included. Text words contained in  
5 200 the titles and abstracts, index terms describing the articles, Medical Subject Headings and truncation were  
6 201 used to develop a full search strategy(56). A second search using a tailored strategy were performed  
7 202 across all databases, including grey literature databases, with the required adjustments to the features of  
8 203 each one (Supplementary File 2). Reflecting the contemporary paradigms of healthcare delivery and the  
9 204 concept of MoC(9), only records published since 2000 were eligible for inclusion. Language restrictions  
10 205 were set for English, Portuguese or Spanish.

11 206 The searches started on the inception date of this review (January 2022) and the last update was  
12 207 performed on December 2022. All search strategies for the different databases were reviewed by and  
13 208 performed with the assistance of an information scientist (HD), who is an experienced research librarian.  
14 209 Reference lists of the eligible records were also screened to find additional studies.

15 210

### 16 211 **Study Selection**

17 212 All records were imported to EndNote X9 (Clarivate Analytics, USA) for removal of duplicates and  
18 213 screening. Two reviewers (STD and DC) independently screened their titles and abstracts and studies  
19 214 included by at least one reviewer were retrieved. Eligibility criteria were tested by piloting a random sample  
20 215 of 25 records and refinements were made until an agreement equal or greater than 75% was reached(58).  
21 216 For full text screening, two researchers (STD and AM) independently assessed the potential for inclusion  
22 217 and divergences were discussed with a third reviewer (DC). Once again, a pilot test was completed with  
23 218 a random sample of 10 studies to ensure consistency during the process.

24 219

### 25 220 **Data charting**

26 221 Several steps were taken to ensure transparency and rigour of data extraction process(54). First, the  
27 222 planned extraction approach was reported in the protocol(56). Secondly, a standardized data extraction  
28 223 form (Supplementary File 3) based on research questions and the PCC framework was developed and  
29 224 piloted. Data extraction included a summary of the studies (title, authors, year of publication, citation,  
30 225 peer-reviewed/grey literature source, study design, study objectives and sample size), the identification  
31 226 of the MoC (name, country, target population, main objectives and main context features) and respective  
32 227 key elements (levels of care and settings, health professionals involved, type of care delivered and core  
33 228 components of health interventions).

34 229 As endorsed, two researchers (STD and AM) extracted data independently from each evidence source  
35 230 and a pilot test of five records concerning different study designs was carried out(54). Uncertainties or  
36 231 disagreements regarding to the data to be extracted were discussed with the research team and, in  
37 232 accordance, adjustments to the form were made. Only data relevant to the research question were  
38 233 extracted and authors of the included studies were emailed to clarify uncertain information and/or to  
39 234 request missing data related to the MoCs. Regular meetings through videoconferencing were performed

235 by the research team, in order to check the data charting, assess the need to update the extraction form  
236 and discuss progress of the review process.

237 In line with the recommendations for conducting scoping reviews(54,55), a quality or risk of bias  
238 assessment was not performed by the reviewers.

239

## 240 ***Synthesis and presentation of results***

241 Findings were synthesized through a basic descriptive qualitative content analysis, which concerns 3  
242 distinct phases: 1) preparation; 2) organizing and 3) reporting(59). As this review is informed by A  
243 *Framework to Evaluate Musculoskeletal Models of Care*(21), a deductive approach was deemed  
244 adequate to perform data extraction and presentation in the preparation phase.

245 In the organization stage, the research team familiarized themselves with the data, understanding how  
246 the data are important to answer the research questions. During and after the extraction process,  
247 reviewers and research team discussed the relevance of the data according to the underlying framework,  
248 respectively.

249 To report the findings, data is presented in narrative, tabular and chart formats regarding each MoC  
250 implemented for the management of LBP. As aforementioned in the data charting section, descriptive  
251 results include the identification of the MoCs, their general description and core components, main context  
252 features and organisational components, such as settings and healthcare professionals involved.  
253 Additionally, quantitative data using a descriptive numerical summary are presented, such as frequency  
254 counts of the overall number of studies included, study designs, geographical distribution of the MoCs,  
255 type of care delivered, among others. As each MoC is the unit of interest in this review, multiple records  
256 of the same MoC are linked and reported together.

257

## 258 **RESULTS**

259

### 260 *Literature search*

261 The literature search yielded 4081 publications, of which 3238 were identified from databases and  
262 registers and 843 from grey literature and handsearching of relevant journals and institutions. Thirty-nine  
263 records were further retrieved after examining reference lists of published reviews and results of the  
264 automatic searches performed monthly in the selected databases. After removing duplicates, 3255  
265 records were screened through title and abstract, and of these, 255 full texts were assessed for eligibility.  
266 The PRISMA flow diagram (Figure 1) outlines the search and selection process, including the reasons for  
267 exclusion of the studies. Twenty-nine studies(24–52), published between 2011 and 2022, were included.  
268 They portray 11 models of care (MoCs) implemented in primary healthcare.

269

### 270 *Characteristics of the included studies*

271 Table 1 summarizes the designation of each MoC and their corresponding studies. Of the 29 records, 19  
272 were quantitative, five were qualitative and five used a mixed methods approach. Among the quantitative  
273 studies, randomized controlled trials (RCTs) (n=9) and observational cohorts (n=9) were the most  
274 common, followed by one non-randomized controlled trial. Through RCT designs, it was evaluated MoCs  
275 clinical effectiveness (4 MoCs)(24,29,32,50,51), cost-effectiveness (3 MoCs)(24,48,50,51), efficacy (2  
276 MoCs)(48,52), cost-utility (1 MoC)(25,46), healthcare resources utilization (4 MoCs)(24,25,29,46,48,50–  
277 52) and healthcare quality (1 MoC)(33). The clinical effectiveness of the Irish STarT Back(47) was  
278 assessed through a non-randomized controlled trial, while observational cohort studies reported findings  
279 regarding clinical efficacy (1 MoC)(36), changes in outcomes over time (4 MoCs)(34,36,38,39,41,45),  
280 healthcare resources utilization (3 MoCs)(36,42–44), costs (1 MoC)(36) and implementation outcomes (1  
281 MoC)(30). Implementation outcomes (3 MoCs)(31,35,49) and implementation strategies (2 MoCs)(26,27)  
282 were also evaluated through qualitative studies. Three mixed methods studies explored patient and  
283 organizational outcomes and experiences of different stakeholders simultaneously in three  
284 MoCs(28,37,40). Additional characteristics of the included studies, such as eligibility criteria, sample  
285 sizes, outcomes and outcome measures can be found in Supplementary File 4.

286

287 **[Please Insert Table 1 – MoCs identification and corresponding studies]**

288

289 ***Research question 1: Which MoCs have been implemented for patients with LBP attending***  
290 ***primary healthcare services?***

291

#### 292 ***General description***

293 The 11 MoCs implemented in primary healthcare for the management of LBP patients are the STarT  
294 Back(24,25,36,46–48), SCOPiC(49–51), MATCH(26,52), TARGET(27–29), BetterBack<sup>©</sup> Model of  
295 Care(30,31,33,50), Low Back and Radicular Pain Pathway(34,35,37–39), Beating Back Pain Service  
296 (BBPS)(40), North East Essex Primary Care Trust (PCT) manual therapy service(41), Interprofessional  
297 Spine Assessment and Education Clinics (ISAEC)(42), Saskatchewan Spine Pathway(SSP)(43,44) and  
298 Back Pain Assessment Clinic (BAC)(45).

299 Target population involved adults with LBP, with or without radicular pain, or radiculopathy. North East  
300 Essex PCT manual therapy service(41) and BAC(45) also included patients with neck pain. BBPS(40)  
301 and Irish STarT Back(47) were the only MoCs that established the duration of pain as an eligibility  
302 criterion, namely, the presence of LBP for more than 6 weeks and 3 months, respectively (Supplementary  
303 File 4).

304 As shown in Table 2, most MoCs were developed to promote evidence-informed practice and guideline-  
305 concordant care to improve clinical effectiveness. MoCs comprising more than one level of care, such as  
306 interface services and/or secondary care(34,35,38,39,42–45,49–51), were especially concerned in

1  
2  
3 307 reducing waiting times and optimizing referral behaviors for imaging, care delivery and specialist review.  
4 308 Goals related to equitable access to care were only identified for the Low Back Pain and Radicular Pain  
5 309 Pathway(34) and the North East Essex PCT manual therapy service(41). Detailed information on the  
6 310 goals of the different MoCs, as well as context features, settings and health professionals involved in care  
7 311 delivery is presented in Table 2.

312

313 **[Please insert Table 2 – General characteristics of the MoCs]**

314

315 ***Context features***

316 All MoCs were implemented in high-income countries from Europe (United Kingdom, Ireland, Denmark,  
317 Sweden), North America (United States of America and Canada) and Australia, as illustrated in Figure 2.  
318 United Kingdom is the country that has implemented the largest number of MoCs (n=5), followed by  
319 United States of America (EUA) (n=2) and Canada (n=2). The only MoC implemented in three countries  
320 (United Kingdom, Ireland, Denmark) was the STarT Back(24,25,36,46–48). However, adaptations of this  
321 MoC, with significant adjustments to its core characteristics, were also implemented in the United States  
322 of America (MATCH and TARGET)(26–29,52) and Sweden (BetterBack<sup>©</sup>)(30,31,33,50).

323

324 **[Please insert Figure 2 – Geographical representation of the MoCs (n=11) implemented for LBP in**  
325 **primary healthcare worldwide]**

326

327 The majority of MoCs were implemented within the National Healthcare Systems through local (n=3) and  
328 regional (n=7) pathways. Only the Low Back Pain and Radicular Pain Pathway refers to a national  
329 MoC(34,35). MATCH(26,52) and TARGET(27–29) were implemented in integrated healthcare delivery  
330 systems of the USA. Additionally, only four studies(29,42,48,50) reported that MoCs (Danish STarT Back,  
331 SCOPIC, TARGET and ISAEC) were implemented in different geographical areas, covering urban, inner  
332 city and rural settings.

333 As aforementioned, most MoCs expressed the intention to deliver evidence-based care and followed  
334 specific clinical practice guidelines to design the service delivery and health interventions for the  
335 management of LBP. Among the European MoCs that reported being informed by guidelines (n=6), five  
336 followed the National Institute for Health and Care Excellence guidance of the United Kingdom. The  
337 BetterBack<sup>©</sup>(30,31,33,50) also was informed by the Danish Health and Medicines Authority. Considering  
338 the MoCs implemented in the United States of America, MATCH(26,52) was informed by treatment  
339 guidelines of the health system where it was implemented (Group Health) and TARGET(27–29) by the  
340 American College of Physicians and the American Physical Therapy Association guidelines. Canadian  
341 MoCs (ISAEC(42) and SSP(43,44)) do not specify the guidelines they followed, although the studies  
342 mention the need to provide care in line with current recommendations.

### 343 **Settings and Healthcare Professionals**

344 Most MoCs for LBP encompass more than one healthcare setting. General practices are the leading entry  
345 point into 8 MoCs (STarT Back, SCOPiC, Low Back and Radicular Pain Pathway, ISAEC, BBPS, SSP,  
346 North East Essex PCT service and BAC), being important in the initial management of LBP patients. In  
347 these MoCs, the continuity of care is delivered in outpatient physiotherapy clinics and community care,  
348 where patients receive the main health interventions. SCOPiC(49–51), Low Back and Radicular Pain  
349 Pathway(34,35,37–39) and BAC(45) also include other settings, such as interface, secondary and tertiary  
350 care services. MATCH(26,52), TARGET(27–29) and BetterBack<sup>©</sup>(30,31,33,50) were implemented only  
351 in primary healthcare clinics with onsite physiotherapy departments.

352 The most common health professionals mentioned in MoCs are general practitioners and  
353 physiotherapists. The former contributes predominantly to the initial assessment and referral of patients  
354 to the health services where they will be treated, while the latter are responsible for the rehabilitation  
355 process. Some models also include osteopaths, chiropractors and acupuncturists(34,35,40–42),  
356 depending on the context of each country with regard to the integration of these health professionals into  
357 the health systems. MoCs that incorporate more than one level of care(34,35,43–45,49–51), comprise  
358 consultations of medical specialities with surgeons and rheumatologists. Four MoCs (Low Back and  
359 Radicular Pain Pathway(34,35,37–39), ISAEC(42), SSP(43,44) SCOPiC(49–51), also include advanced  
360 practice clinicians, usually physiotherapists, who are specialized in triage processes and identification  
361 and management of red flags and emergency conditions.

362

### 363 **Research question 2: What are the key elements of the MoCs?**

364

#### 365 **Type of care**

366 The majority of MoCs (n=7) use a stratified care approach, targeting health intervention to patients'  
367 subgroups based on their prognostic profile (STarT Back, MATCH, TARGET and SCOPiC) and/or pattern  
368 diagnosis (SCOPiC, ISAEC, SSP and BAC). Less treatment is given to those who are at low risk or whose  
369 signs and symptoms are less severe, while high-risk patients receive more specialized treatment or are  
370 referred to secondary care. The only MoC that is characterized by a stepped approach is the BAC(45),  
371 being essentially a health service dedicated to the screening and referral of LBP patients.

372 Hybrid care, combining stratified and stepped approaches, were identified in four MoCs.  
373 BetterBack<sup>©</sup>(30,31,33,50) and Low Back and Radicular Pain Pathway(34,35,37–39) stratify patients  
374 based on clinical prognosis. If there are no improvements after the main health intervention, patients are  
375 referred to additional group care in BetterBack<sup>©</sup>(30,31,33,50) and to Pain Management Services and  
376 specialist spinal surgical options in the Low Back and Radicular Pain Pathway(34,35,37–39). In BBPS(40)  
377 and North East Essex PCT service(41), the stepped care occurs first through education sessions and  
378 usual general practitioner care, respectively. Patients are stratified a posteriori based on their treatment  
379 preferences, such as care provided by physiotherapists, osteopaths or chiropractors. Figure 3 and Table  
380 2 summarize the type of care provided in each MoC.

1  
2  
3 381 **[Please insert Figure 3 – Sunburst chart representing the different approaches of care delivered**  
4 382 **by the MoCs]**

5  
6 383

7  
8 384 ***Core components of MoCs***

9  
10 385 To facilitate the reporting, core components were separated into five moments, which correspond to  
11 386 Referral, Assessment, Health Interventions, Follow-ups and Discharge. These elements are presented in  
12 387 Supplementary File 5.

13  
14  
15 388

16  
17 389 *Referral and Assessment*

18  
19 390 As aforementioned, the initial consultation with a general practitioner is an entry point on the pathway in  
20 391 all MoCs. In some cases, self-referral through direct access to services is possible (STarT Back(24,25),  
21 392 BetterBack<sup>®</sup>(30,31,33,50) and Low Back and Radicular Pain Pathway(34,35)), as well as referral by other  
22 393 health professionals (MATCH, TARGET and ISAEC). Surgeons are the main referrers in SSP(44) and  
23 394 BAC(45).

24  
25  
26 395 The assessment of LBP patients concerns mainly the exclusion of red flags, physical assessment and  
27 396 stratification. Physiotherapists (n=9) are the most common health professionals to carry out the  
28 397 assessment, followed by the GP and triage specialists. The only model that does not carry out an  
29 398 assessment before an intervention is the BBPS(40), which is only performed after a group education  
30 399 session.

31  
32  
33  
34 400

35  
36 401 *Health Interventions*

37  
38 402 Education (n=10), exercise (n=9) and manual therapy (n=7) were the key core elements of MoCs reported  
39 403 by most studies. With the exception of North East Essex PCT service(40) and BAC(45), all MoCs included  
40 404 at least a minimal education intervention, focusing on the reassurance about the benign nature of LBP  
41 405 and self-management strategies. These messages were communicated directly by the health  
42 406 professionals or through support tools, such as written information, DVDs and online contents.

43  
44  
45  
46 407 In MoCs that include a stratified approach, patients receive appropriate matched treatments, with different  
47 408 doses of education, exercise and manual therapy, according to their prognosis, pattern diagnosis or  
48 409 treatment preference. More complex interventions, such as interventions for high-risk patients(24–  
49 410 31,33,36,38,39,46–48,50,52) and community-based spinal rehabilitation programmes(34,35,37–39,45),  
50 411 combine physical and psychological therapies, adding cognitive-behavioural approaches and support for  
51 412 long-term self-management.

52  
53  
54  
55 413 The majority of MoCs include a health intervention that may vary from a single session (for low-risk  
56 414 patients in stratified approaches according to prognosis profile) to several weeks of multifaceted  
57 415 rehabilitation programmes. However, not all models establish a specific duration for these interventions.  
58 416 Individualized treatments are the chosen format for healthcare delivery in most MoCs, with the exception  
59  
60

1  
2  
3 417 of Irish STarT Back(47). Group interventions appear to be a second treatment option  
4 418 (BetterBack<sup>®</sup>(30,31,33,50)) and Low Back and Radicular Pain Pathway(34,35,37–39)), when the main  
5 419 health intervention did not result in benefits for LBP patients.

6  
7  
8 420 Other interventions, such pain medication prescription or review, were usually delivered by GP or other  
9 421 medical doctor in the initial consultation (STarT Back, TARGET, Low Back and Radicular Pain Pathway  
10 422 and SSP). None of the MoCs included occupational interventions or treatments focused on the adoption  
11 423 of healthy lifestyles.

12  
13  
14 424

#### 15 16 425 *Follow-up and Discharge*

17  
18 426 Follow-up management and criteria for discharge were not well-defined in the included studies. When  
19 427 there are no improvements in the health condition, follow-ups may combine referral to additional group  
20 428 interventions, interface or secondary/tertiary care services. Irish(47) and Danish(48) STarT Back,  
21 429 TARGET(27–29) and BBPS(40) did not reported how and when follow-ups are conducted.

22  
23  
24 430 Concerning discharges, it seems they occur at the end of health interventions, but the reporting is not  
25 431 clear. In risk-stratified models, such as STarT Back, patients attend a preset number of appointments to  
26 432 receive treatments. However, it is poorly described if patients are discharged after this period, with 6  
27 433 MoCs not mentioning any criteria or timing. In TARGET(27–29), Low Back and Radicular Pain  
28 434 Pathway(34,35,37–39) and North East Essex PCT service(41) patients can be discharged at any point  
29 435 along the pathway upon improvement of the LBP.

30  
31  
32  
33 436

## 34 35 36 437 **DISCUSSION**

37  
38 438 This study mapped the available evidence regarding the core characteristics, context features and key  
39 439 elements of MoCs implemented in primary healthcare for the management of LBP. Our findings revealed  
40 440 11 MoCs, which share some similarities, but also some differences between them. Most MoCs have been  
41 441 implemented in high-income countries with solid primary healthcare services, where general practitioners  
42 442 and physiotherapists are the main referrers. The majority of MoCs involves complex interventions  
43 443 delivered by physiotherapists, showing great variability in terms of components and duration and unclear  
44 444 follow-up and discharge criteria.

45  
46  
47  
48 445 Firstly, it seems important to underline that most MoCs are still under research and not effectively  
49 446 embedded into health systems as a form of routine practice. Excluding Low Back Pain and Radicular Pain  
50 447 Pathway(34,35), the only MoC implemented nationwide, the remaining continue to be tested locally or  
51 448 regionally. This was already expected as the relevance of implementing MoCs for LBP has been  
52 449 highlighted recently and discussed in contemporary research(60).

53  
54  
55  
56 450 In general, all MoCs sought to introduce healthcare consistent with current clinical guidelines, which is a  
57 451 central recommendation from implementation frameworks(21). Most studies reported they designed the  
58 452 service delivery and health interventions according to national or international clinical practice guidelines.

59  
60



1  
2  
3 453 This decision is supported by contemporary trends suggesting that LBP patients who underwent adherent  
4 454 guideline interventions demonstrate better clinical outcomes and decrease of healthcare utilization and  
5 455 an overall healthcare savings(61). However, it seems important to highlight that only  
6 456 BetterBack<sup>®</sup>(30,31,33,50,62) evaluated care delivery against quality standards. These researchers  
7 457 developed assessment and treatment quality indexes informed by current recommendations and  
8 458 concluded that the adoption of clinical practice guidelines could be substantially improved by introducing  
9 459 a MoC(33). Although these promising findings, it remains unknown if MoCs can overcome the evidence-  
10 460 to-practice gaps identified in LBP literature(9,63) as this outcome was not investigated in the remaining  
11 461 studies.

12 462 Our findings also show that general practices, outpatient physiotherapy clinics and community care are  
13 463 the entry points in most MoCs for LBP patients. Moreover, these are the settings where first health  
14 464 interventions are delivered, mainly provided by general practitioners and physiotherapists. These results  
15 465 are also in accordance with the guidance for MoCs implementation, which states that primary and  
16 466 community care should be prioritised over other levels of care(21).

17 467 Most MoC used stratified care approaches. UK STarT Back(24) was the first MoC using a prediction tool  
18 468 (STarT Back Screening Tool) to stratify patients according to their risk of poor clinical outcome and offer  
19 469 more comprehensive care to those with higher predicted risk. Considering its successful implementation  
20 470 in terms of clinical and cost-effectiveness(24,25,36,46), other MoCs were developed and adapted to  
21 471 specific contexts. Recently, a systematic review found that a stratified care approach provides substantial  
22 472 clinical, economic and health related cost benefits in the medium and high-risk subgroups compared with  
23 473 usual care in short- and medium-term follow-ups(64). This may explain why most MoCs tend to follow a  
24 474 stratified or hybrid approach to deliver care using the STarT Back Screening Tool. However, there is no  
25 475 evidence that stratified are more effective than stepped approaches for the management of LBP. Although  
26 476 most MoCs do not deliver stepped care, this approach has already showed its clinical efficacy for other  
27 477 musculoskeletal conditions, such as osteoarthritis(53). Both approaches, guided by the patient's response  
28 478 to previous care or the results of risk prediction tools, are recommended by several guidelines for the  
29 479 management of LBP(11,13,65,66).

30 480 Regarding health interventions, education and exercise were the front-line care provided for LBP in the  
31 481 majority of the MoCs. These findings portray an important step on the right direction for its management,  
32 482 because they are aligned with contemporary standards of care for quality and best  
33 483 practice(11,13,20,65,66). For example, older studies reported that only 20% were given advice and  
34 484 education in a primary care setting(14,67), although education is sufficient for many LBP patients.  
35 485 Nevertheless, high heterogeneity was found in the report of the care continuum of health interventions,  
36 486 including discharge criteria, which limited comparisons between studies. The improvements in reporting  
37 487 core components of MoCs may provide additional insights for their development and might inform how to  
38 488 facilitate their implementation in clinical practice.

39 489 Several studies reported objectives related to reduction of healthcare utilization, optimization of referral  
40 490 behaviours and decrease wait times for care, imaging or specialist review. To achieve these goals, it is  
41 491 essential an efficient coordination across care sectors and clinical settings, facilitating integrated and

1  
2  
3 492 interprofessional healthcare delivery that is responsive to people's needs(17,21). However, our findings  
4 493 suggest that most MoCs did not detail how care coordination was achieved, confining this information to  
5 494 the description of the clinical pathways and the use of electronic health records. Although integrated care  
6 495 is advocated, recent studies show that clinical pathways for LBP demonstrate basic levels of care  
7 496 integration across primary and secondary care(68,69). Indeed, the findings of our review indicate that  
8 497 promoting integrated care is a goal that was only reported by four of the 11 MoCs(32,33,35–37,44–46),  
9 498 perhaps uncovering that care integration is not a priority or is not being addressed in a successful way. It  
10 499 is necessary to develop innovative mechanisms that encourage communication between health  
11 500 providers, promoting close collaboration across different levels of care.

12 501 This scoping review has strengths and limitations. The major strength include adherence to JBI  
13 502 recommendations(54,55,58), ensuring a robust and systematic methodology, right from protocol design  
14 503 to the presentation of results. Critical aspects such as construction of the search strategy, screening of  
15 504 records by two independent reviewers, and regular team discussions during data extraction and analysis  
16 505 were conducted under this guidance. However, the study also faced challenges such as potential  
17 506 evidence selection bias due to search strategies and language restrictions, possibly excluding some  
18 507 pertinent studies on MoCs. Variations in MoC terminologies in literature and ambiguity between specific  
19 508 evidence-based interventions and MoCs posed additional issues. Despite a focus on LBP-related MoCs,  
20 509 other relevant studies concerning spinal disorders may have been missed. To mitigate these issues, a  
21 510 broad search strategy, an overinclusion approach during screening, and regular reviewer discussions  
22 511 were employed. Yet, the diversity in MoC reporting possibly led to the omission of certain information,  
23 512 even though specific frameworks and a continuously adapted data form were utilized to tackle this  
24 513 challenge.

25 514 The main purpose of this review was to inform research, practice and policies on the development and  
26 515 implementation of MoCs. It is our intention to continue this reflection by responding the research questions  
27 516 that remain unanswered in this article. A following paper will focus on synthesizing context-specific factors  
28 517 and outcomes used to evaluate the implementation of MoCs for LBP in primary healthcare. It is expected  
29 518 that this information may provide a comprehensive understanding of how implementation processes and  
30 519 strategies may have influenced outcomes.

31 520 Throughout this process, it became evident that most of the MoCs implemented for LBP in primary  
32 521 healthcare are still under investigation and require further testing to produce robust estimates on their  
33 522 effectiveness, as well as guidance for optimal implementation. Some studies focused on investigating  
34 523 clinical effectiveness of MoCs through RCT designs, but the majority used frailer study designs to report  
35 524 changes in clinical outcomes and health resources utilization, such as observational or registry-based  
36 525 studies. Future research should focus on effectiveness-implementation studies with pragmatic designs to  
37 526 reproduce the challenges of implementing MoCs in real-world clinical settings, such as integration across  
38 527 care sectors and differences on funding models, context features and teams of healthcare  
39 528 providers(62,70,71). Additionally, systematic reviews and meta-analysis are needed to assess the  
40 529 methodological quality of the studies and provide stronger conclusions on their findings. This knowledge  
41 530 may contribute to the development of health policies, interventions and infrastructures favouring the  
42  
43  
44  
45  
46  
47  
48  
49  
50  
51  
52  
53  
54  
55  
56  
57  
58  
59  
60

1  
2  
3 531 implementation of a MoC that promote the delivery of high-quality care for LBP patients in the most  
4 532 efficient and sustainable way for health systems.

5  
6 533

## 7 8 9 534 **CONCLUSION**

10  
11 535 Despite clear differences between MoCs implemented for LBP patients in primary healthcare, this study  
12 536 provides a broad overview of their key common elements, which is essential new knowledge to inform  
13 537 the development of health services and to underpin future research implementation studies. Most MoCs  
14 538 for LBP are aligned with current clinical practice guideline recommendations. Primary healthcare is the  
15 539 entry point for patients into the health system and they are offered stratified care approaches, based on  
16 540 education, exercise and manual therapy. More complex interventions or referral to secondary and tertiary  
17 541 care are feasible options when first approaches fail. However, most studies were very heterogeneous in  
18 542 the reporting of the care continuum of the MoCs, making comparison between them difficult.

19  
20  
21 543

22  
23  
24 544 **Funding:** This project is supported by FCT – Fundação para a Ciência e a Tecnologia, I.P., under the  
25 545 PhD grant awarded to STD (UI/BD/150882/2021) and the MyBack project (PTDC/SAU-SER/7406/2020),  
26 546 in which EBC is the principal investigator.

27  
28 547 **Competing Interests:** The authors declare no conflicts of interest.

29  
30 548 **Acknowledgements:** The authors gratefully thank the late Professor Carla Nunes for considerable help  
31 549 and inspiration in the design and development of this study.

32  
33 550 **Author contributions:** STD, EBC, PA and DC conceived the study. HD supported the formulation of  
34 551 search strategies and the literature search. Title and abstract screening were performed by STD and DC.  
35 552 Full-text screening and data extraction was carried out by STD and AM with the support of DC to solve  
36 553 disagreements. Data analysis was performed by STD and discussed with EBC, PA and BH throughout  
37 554 the process. STD drafted this manuscript. All authors revised and approved the final version of the  
38 555 manuscript.

39  
40 556 **Data sharing:** Not applicable as no datasets were generated for this study. All relevant data were included  
41 557 in the article or as supplementary file. Additional data are not available.

42  
43 558

## 44 45 46 559 **REFERENCES**

- 47  
48  
49 560 1. GBD 2021 Low Back Pain Collaborators. Global, regional, and national burden of low back pain,  
50 561 1990 – 2020, its attributable risk factors , and projections to 2050: a systematic analysis of the  
51 562 Global Burden of Disease Study 2021. *Lancet Rheumatol.* 2023;5(June).
- 52 563 2. Wasiak R, Kim JY, Pransky G. Work disability and costs caused by recurrence of low back pain:  
53 564 Longer and more costly than in first episodes. *Spine (Phila Pa 1976).* 2006;
- 54 565 3. Hartvigsen J, Hancock MJ, Kongsted A, Louw Q, Ferreira ML, Genevay S, et al. What low back

- 1  
2  
3 566 pain is and why we need to pay attention. *Lancet*. 2018;391(10137):2356–67.  
4  
5 567 4. Gouveia N, Canhão H, Branco JC. The Burden of Chronic Low Back Pain in the Adult Portuguese  
6 568 Population: an Epidemiological Population-Based Study Under the Scope of Epireumapt.  
7 569 Faculdade de Ciências Médicas da Universidade Nova de Lisboa; 2015.  
8  
9  
10 570 5. Gouveia N, Rodrigues A, Eusébio M, Ramiro S, Machado P, Canhão H, et al. Prevalence and  
11 571 social burden of active chronic low back pain in the adult Portuguese population: results from a  
12 572 national survey. *Rheumatol Int*. 2016;36(2):183–97.  
13  
14 573 6. Lemmers GPG, van Lankveld W, Westert GP, van der Wees PJ, Staal JB. Imaging versus no  
15 574 imaging for low back pain: a systematic review, measuring costs, healthcare utilization and  
16 575 absence from work. *Eur Spine J* [Internet]. 2019;28(5):937–50. Available from:  
17 576 <https://doi.org/10.1007/s00586-019-05918-1>  
18  
19 577 7. Kim LH, Vail D, Azad TD, Bentley JP, Zhang Y, Ho AL, et al. Expenditures and Health Care  
20 578 Utilization Among Adults With Newly Diagnosed Low Back and Lower Extremity Pain. *JAMA Netw*  
21 579 *open*. 2019;2(5):e193676.  
22  
23 580 8. Oliveira CB, Maher CG, Pinto RZ, Traeger AC, Lin CWC, Chenot JF, et al. Clinical practice  
24 581 guidelines for the management of non-specific low back pain in primary care: an updated overview.  
25 582 *Eur Spine J* [Internet]. 2018;27(11):2791–803. Available from: [https://doi.org/10.1007/s00586-](https://doi.org/10.1007/s00586-018-5673-2)  
26 583 [018-5673-2](https://doi.org/10.1007/s00586-018-5673-2)  
27  
28 584 9. Dzedzic KS, French S, Davis AM, Geelhoed E, Porcheret M. Implementation of musculoskeletal  
29 585 Models of Care in primary care settings: Theory, practice, evaluation and outcomes for  
30 586 musculoskeletal health in high-income economies. *Best Pract Res Clin Rheumatol* [Internet].  
31 587 2016;30(3):375–97. Available from: <http://dx.doi.org/10.1016/j.berh.2016.08.004>  
32  
33 588 10. Beyera GK, O'Brien J, Campbell S. Health-care utilisation for low back pain: a systematic review  
34 589 and meta-analysis of population-based observational studies. *Rheumatol Int* [Internet].  
35 590 2019;39(10):1663–79. Available from: <https://doi.org/10.1007/s00296-019-04430-5>  
36  
37 591 11. National Institute for Health and Care Excellence. Low back pain and sciatica in over 16s:  
38 592 assessment and management. Full guideline: Assessment and noninvasive treatments. Royal  
39 593 college of Physicians. 2016.  
40  
41 594 12. Chenot JF, Greitemann B, Kladny B, Petzke F, Pflingsten M, Schorr SG. Clinical Practice  
42 595 Guideline: Non-specific low back pain. *Dtsch Arztebl Int*. 2017;114:883–90.  
43  
44 596 13. Qaseem A, Wilt TJ, McLean RM, Forcica MA. Noninvasive treatments for acute, subacute, and  
45 597 chronic low back pain: A clinical practice guideline from the American College of Physicians. *Ann*  
46 598 *Intern Med*. 2017;166(7):514–30.  
47  
48 599 14. Lin I, Wiles L, Waller R, Goucke R, Nagree Y, Gibberd M, et al. What does best practice care for  
49 600 musculoskeletal pain look like? Eleven consistent recommendations from high-quality clinical  
50 601 practice guidelines: Systematic review. *Br J Sports Med*. 2019;1–10.  
51  
52  
53  
54  
55  
56  
57  
58  
59  
60

- 1  
2  
3 602 15. Buchbinder R, Underwood M, Hartvigsen J, Maher CG. The Lancet Series call to action to reduce  
4 603 low value care for low back pain: an update. *Pain*. 2020;161(9):S57–64.
- 6 604 16. Powell AC, Rogstad TL, Elliott SW, Price SE, Long JW, Deshmukh UU, et al. Health care utilization  
7 605 and pain outcomes following early imaging for low back pain in older adults. *J Am Board Fam Med*.  
8 606 2019;32(6):773–80.
- 11 607 17. Speerin R, Needs C, Chua J, Woodhouse LJ, Nordin M, Mcglasson R, et al. Implementing models  
12 608 of care for musculoskeletal conditions in health systems to support value-based care. *Best Pract  
13 609 Res Clin Rheumatol* [Internet]. 2020;34(5). Available from:  
14 610 <https://doi.org/10.1016/j.berh.2020.101548>
- 17 611 18. Foster NE, Anema JR, Cherkin D, Chou R, Cohen SP, Gross DP, et al. Prevention and treatment  
18 612 of low back pain: evidence, challenges, and promising directions. *Lancet*. 2018;391(10137):2368–  
19 613 83.
- 22 614 19. Hall AM, Scurry SR, Pike AE, Albury C, Richmond HL, Matthews J, et al. Physician-reported  
23 615 barriers to using evidence-based recommendations for low back pain in clinical practice: A  
24 616 systematic review and synthesis of qualitative studies using the Theoretical Domains Framework.  
25 617 *Implement Sci*. 2019;14(1):1–19.
- 28 618 20. Traeger AC, Buchbinder R, Elshaug AG, Croft PR, Maher CG. Care for low back pain: can health  
29 619 systems deliver? *Bull World Health Organ* [Internet]. 2019;97(6):423–33. Available from:  
30 620 <http://www.who.int/entity/bulletin/volumes/97/6/18-226050.pdf>
- 33 621 21. Briggs AM, Jordan JE, Jennings M, Speerin R, Chua J, Bragge P, et al. A Framework to Evaluate  
34 622 Musculoskeletal Models of Care [Internet]. Cornwall, UK; 2016. Available from:  
35 623 <http://bjdonline.org/a-framework-to-evaluate-musculoskeletal-models-of-care/>
- 38 624 22. Briggs AM, Chan M, Slater H. Models of Care for musculoskeletal health: Moving towards  
39 625 meaningful implementation and evaluation across conditions and care settings. *Best Pract Res  
40 626 Clin Rheumatol* [Internet]. 2016;30(3):359–74. Available from:  
41 627 <http://dx.doi.org/10.1016/j.berh.2016.09.009>
- 44 628 23. Chehade MJ, Yadav L, Kopansky-Giles D, Merolli M, Palmer E, Jayatilaka A, et al. Innovations to  
45 629 improve access to musculoskeletal care. *Best Pract Res Clin Rheumatol* [Internet].  
46 630 2020;(xxxx):101559. Available from: <https://doi.org/10.1016/j.berh.2020.101559>
- 49 631 24. Hill JC, Whitehurst DGT, Lewis M, Bryan S, Dunn KM, Foster NE, et al. Comparison of stratified  
50 632 primary care management for low back pain with current best practice (STarT Back): a randomised  
51 633 controlled trial. *Lancet*. 2011;378(9802):1560–71.
- 54 634 25. Whitehurst DGTT, Bryan S, Lewis M, Hill J, Hay EM. Exploring the cost-utility of stratified primary  
55 635 care management for low back pain compared with current best practice within risk-defined  
56 636 subgroups. *Ann Rheum Dis*. 2012 Nov;71(11):1796–802.
- 59 637 26. Hsu C, Evers S, Balderson BH, Sherman KJ, Foster NE, Estlin K, et al. Adaptation and  
60

- 1  
2  
3 638 implementation of the start back risk stratification strategy in a US health care organization: A  
4 639 process evaluation. *Pain Med (United States)*. 2019 Jun;20(6):1105–19.
- 6 640 27. Beneciuk JM, George SZ, Greco CM, Schneider MJ, Wegener ST, Saper RB, et al. Targeted  
7 641 interventions to prevent transitioning from acute to chronic low back pain in high-risk patients:  
8 642 development and delivery of a pragmatic training course of psychologically informed physical  
9 643 therapy for the TARGET trial. *Trials*. 2019 May;20(1):256.
- 12 644 28. Middleton A, Fitzgerald GK, Delitto A, Saper RB, Gergen Barnett K, Stevans J. Implementing  
13 645 stratified care for acute low back pain in primary care using the STarT Back instrument: a process  
14 646 evaluation within the context of a large pragmatic cluster randomized trial. *BMC Musculoskelet  
15 647 Disord*. 2020 Dec;21(1).
- 19 648 29. Delitto A, Patterson CG, Stevans JM, Freburger JK, Khoja SS, Schneider MJ, et al. Stratified care  
20 649 to prevent chronic low back pain in high-risk patients: the TARGET trial. A multi-site pragmatic  
21 650 cluster randomized trial. *Eclinicalmedicine*. 2021;34.
- 23 651 30. Schröder K, Öberg B, Enthoven P, Kongsted A, Abbott A, Schroder K, et al. Confidence, attitudes,  
24 652 beliefs and determinants of implementation behaviours among physiotherapists towards clinical  
25 653 management of low back pain before and after implementation of the BetterBack model of care.  
26 654 *BMC Health Serv Res*. 2020 May;20(1).
- 30 655 31. Enthoven P, Eddeborn F, Abbott A, Schroder K, Fors M, Oberg B. Patients' experiences of the  
31 656 BetterBack model of care for low back pain in primary care - a qualitative interview study. *Int J  
32 657 Qual Stud Health Well-being*. 2021;16(1).
- 34 658 32. Schröder K, Öberg B, Enthoven P, Hedevik H, Fors M, Abbott A. Effectiveness and Quality of  
35 659 Implementing a Best Practice Model of Care for Low Back Pain (BetterBack) Compared with  
36 660 Routine Care in Physiotherapy: A Hybrid Type 2 Trial. *J Clin Med*. 2021;10(6):1230.
- 39 661 33. Schröder K, Öberg B, Enthoven P, Hedevik H, Abbott A. Improved adherence to clinical guidelines  
40 662 for low back pain after implementation of the BetterBack model of care: A stepped cluster  
41 663 randomized controlled trial within a hybrid type 2 trial. *Physiother Theory Pract*. 2022 Mar;1–15.
- 44 664 34. Greenhough C. National Back Pain and Radicular Pain Pathway 2017 - Including Implementation  
45 665 of NICE Guidance NG59. *Trauma Program Care NHS Engl*. 2017;(June).
- 47 666 35. Ryan C, Pope CJ, Roberts L. Why managing sciatica is difficult: patients' experiences of an NHS  
48 667 sciatica pathway. A qualitative, interpretative study. *BMJ Open*. 2020;10(6):e037157.
- 51 668 36. Foster NE, Mullis R, Hill JC, Lewis M, Whitehurst DG, Doyle C, et al. Effect of stratified care for  
52 669 low back pain in family practice (IMPACT Back): a prospective population-based sequential  
53 670 comparison. *Ann Fam Med*. 2014;12(2):102–11.
- 55 671 37. Martin D, Ryan C, Wellburn S, Hamilton S, Jess MA. The North of England Regional Back Pain  
56 672 and Radicular Pain Pathway: Evaluation. 2018;(February):1–26.
- 58 673 38. Jess MA, Ryan C, Hamilton S, Wellburn S, Atkinson G, Greenough C, et al. Does duration of pain

- 1  
2  
3 674 at baseline influence clinical outcomes of low back pain patients managed on an evidence-based  
4 675 pathway? *Spine (Phila Pa 1976)*. 2018;43(17):E998–1004.
- 6 676 39. Jess MA, Ryan C, Hamilton S, Wellburn S, Atkinson G, Greenough C, et al. Does Duration of Pain  
7 677 at Baseline Influence Longer-term Clinical Outcomes of Low Back Pain Patients Managed on an  
8 678 Evidence-Based Pathway? *Spine (Phila Pa 1976)*. 2021;46(3):191–7.
- 11 679 40. Cheshire A, Polley M, Peters D, Ridge D. Patient outcomes and experiences of an acupuncture  
12 680 and self-care service for persistent low back pain in the NHS: A mixed methods approach. *BMC*  
13 681 *Complement Altern Med*. 2013;13(1):1.
- 16 682 41. Gurden M, Morelli M, Sharp G, Baker K, Betts N, Bolton J. Evaluation of a general practitioner  
17 683 referral service for manual treatment of back and neck pain. *Prim Health Care Res Dev*.  
18 684 2012;13(3):204–10.
- 21 685 42. Zarrabian M, Bidos A, Fanti C, Young B, Drew B, Puskas D, et al. Improving spine surgical access,  
22 686 appropriateness and efficiency in metropolitan, urban and rural settings. *Can J Surg*.  
23 687 2017;60(5):342–8.
- 26 688 43. Kindrachuk DR, Fourney DR. Spine surgery referrals redirected through a multidisciplinary care  
27 689 pathway: effects of nonsurgeon triage including MRI utilization. *J Neurosurg Spine*.  
28 690 2013;20(1):87–92.
- 30 691 44. Wilgenbusch CS, Wu AS, Fourney DR. Triage of spine surgery referrals through a multidisciplinary  
31 692 care pathway: A value-based comparison with conventional referral processes. *Spine (Phila Pa*  
32 693 *1976)*. 2014;39(22):S129–35.
- 35 694 45. Moi JHY, Phan U, de Gruchy A, Liew D, Yuen TI, Cunningham JE, et al. Is establishing a  
36 695 specialist back pain assessment and management service in primary care a safe and effective  
37 696 model? Twelve-month results from the Back pain Assessment Clinic (BAC) prospective cohort  
38 697 pilot study. *BMJ Open*. 2018 Oct;8(10).
- 41 698 46. Whitehurst DGT, Bryan S, Lewis M, Hay EM, Mullis R, Foster NE. Implementing stratified primary  
42 699 care management for low back pain: Cost-utility analysis alongside a prospective, population-  
43 700 based, sequential comparison study. *Spine (Phila Pa 1976)*. 2015;40(6):405–14.
- 46 701 47. Murphy SE, Blake C, Power CK, Fullen BM. Comparison of a Stratified Group Intervention (STarT  
47 702 Back) with Usual Group Care in Patients with Low Back Pain: A Nonrandomized Controlled Trial.  
48 703 *Spine (Phila Pa 1976)*. 2016;41(8):645–52.
- 51 704 48. Morsø L, Olsen Rose K, Schiøttz-Christensen B, Sowden G, Søndergaard J, Christiansen DH.  
52 705 Effectiveness of stratified treatment for back pain in Danish primary care: A randomized controlled  
53 706 trial. *Eur J Pain (United Kingdom)*. 2021;25(9):2020–38.
- 56 707 49. Saunders B, Konstantinou K, Artus M, Foster NE, Bartlam B. Patients' and clinicians' perspectives  
57 708 on a "fast-track" pathway for patients with sciatica in primary care: Qualitative findings from the  
58 709 SCOPiC stratified care trial. *BMC Musculoskelet Disord*. 2020;21(1).
- 60

- 1  
2  
3 710 50. Konstantinou K, Lewis M, Dunn KM, Ogollah R, Artus M, Hill JC, et al. Stratified care versus usual  
4 711 care for management of patients presenting with sciatica in primary care (SCOPIc): a randomised  
5 712 controlled trial. *Lancet Rheumatol*. 2020;2(7):e401–11.
- 6  
7  
8 713 51. Foster NE, Konstantinou K, Lewis M, Ogollah R, Saunders B, Kigozi J, et al. Stratified versus usual  
9 714 care for the management of primary care patients with sciatica: The scopic RCT. *Health Technol*  
10 715 *Assess (Rockv)*. 2020 Oct;24(49):1–160.
- 11  
12  
13 716 52. Cherkin D, Balderson B, Wellman R, Hsu C, Sherman KJ, Evers SC, et al. Effect of Low Back  
14 717 Pain Risk-Stratification Strategy on Patient Outcomes and Care Processes: the MATCH  
15 718 Randomized Trial in Primary Care. *J Gen Intern Med*. 2018;33(8):1324–36.
- 16  
17  
18 719 53. Kongsted A, Kent P, Quicke JG, Skou ST, Hill JC. Risk-stratified and stepped models of care for  
19 720 back pain and osteoarthritis: are we heading towards a common model? *PAIN Reports*.  
20 721 2020;5(5):e843.
- 21  
22  
23 722 54. Pollock D, Peters MDJ, Khalil H, McInerney P, Alexander L, Tricco AC, et al. Recommendations  
24 723 for the extraction, analysis, and presentation of results in scoping reviews. *JB I Evid Synth*.  
25 724 2023;21(3):520–32.
- 26  
27  
28 725 55. Peters MDJ, Godfrey C, McInerney P, Khalil H, Larsen P, Marnie C, et al. Best practice guidance  
29 726 and reporting items for the development of scoping review protocols. *JB I Evid Synth*.  
30 727 2022;20(4):953–68.
- 31  
32  
33 728 56. Duarte ST, Nunes C, Costa D, Donato H, Cruz EB. Models of care for low back pain patients in  
34 729 primary healthcare: a scoping review protocol. *BMJ Open*. 2022;12(4).
- 35  
36  
37 730 57. WHO. Operational Framework for Primary Health Care [Internet]. World Health Organization.  
38 731 2020. 1–132 p. Available from: <https://www.who.int/publications/i/item/9789240017832>
- 39  
40  
41 732 58. Peters MD, Godfrey C, McInerney P, Munn Z, Tricco AC, Khalil H. Chapter 11: Scoping Reviews.  
42 733 In: Aromataris E, Munn Z, editors. *JB I Manual for Evidence Synthesis*. 2021.
- 43  
44  
45 734 59. Elo S, Kyngäs H. The qualitative content analysis process. *J Adv Nurs*. 2008;62(1):107–15.
- 46  
47  
48 735 60. Buchbinder R, van Tulder M, Öberg B, Costa LM, Woolf A, Schoene M, et al. Low back pain: a  
49 736 call for action. *Lancet*. 2018;391(10137):2384–8.
- 50  
51  
52 737 61. Hanney WJ, Masaracchio M, Liu X, Kolber MJ. The influence of physical therapy guideline  
53 738 adherence on healthcare utilization and costs among patients with low back pain: A systematic  
54 739 review of the literature. *PLoS One*. 2016;11(6):1–18.
- 55  
56  
57 740 62. Schröder K. Implementing BetterBack – a Best Practice Physiotherapy Healthcare Model for Low  
58 741 Back Pain : Clinician and Patient Evaluation. Linköping University Medical Dissertations. 2021.
- 59  
60  
61 742 63. Lau R, Stevenson F, Ong BN, Dziedzic K, Treweek S, Eldridge S, et al. Achieving change in  
62 743 primary care-causes of the evidence to practice gap: Systematic reviews of reviews. *Implement*  
63 744 *Sci [Internet]*. 2016;11(1). Available from: <http://dx.doi.org/10.1186/s13012-016-0396-4>



- 1  
2  
3 745 64. Ogbeivor C, Elsabbagh L. Management approach combining prognostic screening and targeted  
4 746 treatment for patients with low back pain compared with standard physiotherapy: A systematic  
5 747 review & meta-analysis. *Musculoskeletal Care*. 2021;  
6  
7  
8 748 65. Agency for Clinical Innovation. Management of people with acute low back pain - Model of care.  
9 749 Vol. 58, *La Revue du praticien*. 2016.  
10  
11 750 66. Wambeke P, Desomer A, Ailliet L, Demoulin C. Low Back Pain and Radicular Pain: Assessment  
12 751 and Management 2017. 2017;  
13  
14 752 67. Williams CM, Maher CG, Hancock MJ, McAuley JH, McLachlan AJ, Britt H, et al. Low back pain  
15 753 and best practice care a survey of general practice physicians. *Arch Intern Med*. 2010;170(3):271–  
16 754 7.  
17  
18  
19 755 68. Coeckelberghs E, Verbeke H, Desomer A, Jonckheer P, Fournay D, Willems P, et al. International  
20 756 comparative study of low back pain care pathways and analysis of key interventions. *Eur Spine J*  
21 757 [Internet]. 2021;30(4):1043–52. Available from: <https://doi.org/10.1007/s00586-020-06675-2>  
22  
23  
24 758 69. Murphy C, French H, McCarthy G, Cunningham C. Clinical pathways for the management of low  
25 759 back pain from primary to specialised care: a systematic review. *Eur Spine J*. 2022;31(7):1846–  
26 760 65.  
27  
28  
29 761 70. Landes SJ, McBain SA, Curran GM. An introduction to effectiveness-implementation hybrid  
30 762 designs. *Psychiatry Res*. 2019;280(March).  
31  
32 763 71. Curran GM, Landes SJ, McBain SA, Pyne JM, Smith JD, Fernandez ME, et al. Reflections on 10  
33 764 years of effectiveness-implementation hybrid studies. *Front Heal Serv*. 2022;2(1).  
34  
35  
36 765  
37  
38  
39  
40  
41  
42  
43  
44  
45  
46  
47  
48  
49  
50  
51  
52  
53  
54  
55  
56  
57  
58  
59  
60

766 **Table 1. MoCs identification and corresponding studies**

| MoC designation                                                                             | Country | Population                               | Study                        | Objective                                                                                                                                                                                                                                                | Type of study                      |
|---------------------------------------------------------------------------------------------|---------|------------------------------------------|------------------------------|----------------------------------------------------------------------------------------------------------------------------------------------------------------------------------------------------------------------------------------------------------|------------------------------------|
| <b>START BACK Subgroups for Targeted Treatment</b>                                          | UK      | LBP, radiculopathy                       | Hill et al. (2011)(24)       | To compare the clinical effectiveness and cost-effectiveness of stratified primary care with non-stratified current best practice (STarT Back trial)                                                                                                     | RCT                                |
|                                                                                             |         |                                          | Whitehurst et al. (2012)(25) | To determine the economic implications of providing stratified care compared with non-stratified current best practice for each specific risk-defined subgroup (STarT Back trial)                                                                        | RCT (cost-utility)                 |
|                                                                                             |         |                                          | Foster et al. (2014)(36)     | To determine the effects of implementing risk-stratified in family practice on physician's clinical behaviour, patient outcomes and costs (IMPACT Back trial)                                                                                            | Observational cohort, before-after |
|                                                                                             |         |                                          | Whitehurst et al. (2015)(46) | To explore the cost-utility of implementing stratified care in general practice, compared with usual care, within risk-defined patient subgroups (IMPACT Back trial)                                                                                     | RCT (cost-utility)                 |
|                                                                                             | Ireland | LBP, radicular pain                      | Murphy et al. (2016)(47)     | To explore the effectiveness of group-based (high-risk group) stratified care in primary care                                                                                                                                                            | Nonrandomized controlled trial     |
|                                                                                             | Denmark | LBP, radicular pain                      | Morsø et al. (2021)(48)      | To evaluate the clinical efficacy and cost-effectiveness of stratified care compared with current practice in Danish primary care                                                                                                                        | RCT                                |
| <b>SCOPiC Sciatica Outcomes in Primary Care</b>                                             | UK      | LBP, radicular pain (suspected sciatica) | Saunders et al. (2020)(49)   | To explore patients' and clinicians' perspectives on the acceptability of the 'fast-track' pathway                                                                                                                                                       | Qualitative                        |
|                                                                                             |         |                                          | Konstantinou et al. (2020)   | To investigate the clinical and cost-effectiveness of stratified care versus non-stratified usual care for patients presenting with sciatica in primary care                                                                                             | RCT                                |
|                                                                                             |         |                                          | Foster et al. (2020)(51)     | To compare the clinical effectiveness and cost-effectiveness of the SCOPiC care versus non-SCOPiC care in primary care                                                                                                                                   | Mixed methods                      |
| <b>MATCH Matching Appropriate Treatment to Consumers' Healthcare needs</b>                  | USA     | LBP                                      | Cherkin et al. (2018)(52)    | To evaluate the effect of implementing an adaptation of the STarT Back strategy in a US primary care setting                                                                                                                                             | Cluster RCT                        |
|                                                                                             |         |                                          | Hsu et al. (2019)(26)        | To describe the implementation strategies and uptake of an intervention that incorporated the STarT Back stratified care model into several primary care clinics                                                                                         | Qualitative                        |
| <b>TARGET Targeted Interventions to Prevent Chronic Low Back Pain in High-Risk Patients</b> | USA     | LBP                                      | Beneciuk et al. (2019)(27)   | To describe the training developed and delivered to prepare PTs for providing treatment in the TARGET trial                                                                                                                                              | Qualitative                        |
|                                                                                             |         |                                          | Middleton et al. (2020)(28)  | To examine variation in risk stratification and referral of high-risk patients to psychologically informed physical therapy; and to identify barriers and facilitators related to the risk stratification and referral processes.                        | Mixed methods                      |
|                                                                                             |         |                                          | Delitto et al. (2021)(29)    | To test if implementation of a risk-stratified approach to care would result in lower rates of chronic LBP and improved self-reported disability; and if the stratified approach supplemented with referral to PIPT is superior to stratified care alone | Cluster RCT                        |
| <b>BETTERBACK® Model of Care</b>                                                            | Sweden  | LBP                                      | Schröder et al. (2020)(30)   | To evaluate PTs' confidence, attitudes and beliefs in managing patients before and after a multifaceted implementation of the BetterBack® and to evaluate determinants of implementation behaviours among PTs                                            | Observational cohort, before-after |
|                                                                                             |         | LBP, radiculopathy                       | Enthoven et al. (2021)(31)   | To describe patient experiences of received primary care according to the BetterBack® in primary care                                                                                                                                                    | Qualitative                        |
|                                                                                             |         | LBP, radiculopathy                       | Schröder et al. (2021)       | To evaluate the effectiveness and a sustained multifaceted implementation strategy of the BetterBack® compared to routine PT care; To compare patient outcomes based on the fidelity of clinical practice quality index adherence regarding PT care.     | Cluster RCT                        |

|                                                                          |                 |                     |                                                  |                                                                                                                                                                                                                                                                                          |                                              |
|--------------------------------------------------------------------------|-----------------|---------------------|--------------------------------------------------|------------------------------------------------------------------------------------------------------------------------------------------------------------------------------------------------------------------------------------------------------------------------------------------|----------------------------------------------|
|                                                                          |                 | LBP, radiculopathy  | Schröder et al. (2022)(33)                       | To evaluate if PT' adherence to clinical practice guideline recommendations improves after a multifaceted implementation of the BetterBack©                                                                                                                                              | Cluster RCT                                  |
| <b>Low Back and Radicular Pain Pathway</b>                               | UK (National)   | LBP, radicular pain | Greenough (2017)(34)                             | To produce and use a generic pathway for the management of LBP and radicular pain in adults, from the general practitioner's surgery to specialised care                                                                                                                                 | Report (grey literature)                     |
|                                                                          |                 | Sciatica            | Ryan et al. (2020)(35)                           | To explore how people experience being managed for sciatica within a National Health Service pathway                                                                                                                                                                                     | Qualitative                                  |
|                                                                          | UK (North)      | LBP, radicular pain | Martin et al. (2018)(37)                         | To evaluate what changes are seen in patient outcomes and experiences, and in the performance of the health service following the implementation of the pathway                                                                                                                          | Mixed methods (grey literature)              |
|                                                                          | UK (North East) | LBP, radicular pain | Jess et al. (2018)(38)<br>Jess et al. (2021)(39) | To investigate the association between the duration of pain at baseline and the clinical outcomes of patients with LBP enrolled on NERBPP<br>To evaluate the association between baseline pain duration and medium-to-long term clinical outcomes in LBP patients enrolled on the NERBPP | Observational cohort<br>Observational cohort |
| <b>Beating Back Pain Service (BBPS)</b>                                  | UK              | LBP                 | Cheshire et al. (2013)(40)                       | To report patient outcomes and experiences of the BBPS                                                                                                                                                                                                                                   | Mixed methods                                |
| <b>North East Essex Primary Care Trust manual therapy service</b>        | UK              | Back or neck pain   | Gurden et al. (2012)(41)                         | To describe and evaluate a community-based musculoskeletal service in terms of patient-reported outcomes and satisfaction                                                                                                                                                                | Observational cohort                         |
| <b>Inter-professional Spine Assessment and Education Clinics (ISAEC)</b> | Canada          | LBP                 | Zarrabian et al. (2017)(42)                      | To determine the effect of ISAEC on access for surgical assessment, referral appropriateness and efficiency for patients meeting a priori referral criteria in rural, urban and metropolitan settings                                                                                    | Observational cohort                         |
| <b>Saskatchewan Spine Pathway (SSP)</b>                                  | Canada          | LBP, radicular pain | Kindrachuk & Fourney (2014)(43)                  | To determine how the SSP pathway affects utilization of MRI and spine surgery                                                                                                                                                                                                            | Retrospective study, registry-based          |
|                                                                          |                 |                     | Wilgenbusch et al. (2014)(44)                    | To determine if outpatient referrals through a multidisciplinary spine care pathway were more likely to be candidates for surgery than conventional physician referrals; to compare clinical differences wait times for magnetic resonance imaging and surgical assessment.              | Retrospective study, registry-based          |
| <b>Back Pain Assessment Clinic (BAC)</b>                                 | Australia       | LBP and neck pain   | Moi et al. (2018)(45)                            | To report on the design, implementation and evaluation of the safety and effectiveness of the BAC model                                                                                                                                                                                  | Observational cohort pilot study             |

**Abbreviations:**

BAC – Back pain Assessment Clinic; BBPS – Beating Back Pain Service (BBPS); ISAEC – Inter-professional Spine Assessment and Education Clinics; LBP – Low Back Pain; MoC – Model of Care; MRI – Magnetic Resonance Imaging; NERBPP – North East Low Back and Radicular Pain Pathway; PTs – Physiotherapists; RCT – Randomized controlled trial; SCOPIC - Sciatica Outcomes in Primary Care; SSP – Saskatchewan Spine Pathway;

768

Table 2. General characteristics of the MoCs

| MoC        | Study                     | MoC Goals                                                                                                                                                                                                                                          | Type of care                                    | Settings                                                                                                     | Health professionals                                              | Context features                                                                                                                                                                                                                                                                                                                                                                                    |
|------------|---------------------------|----------------------------------------------------------------------------------------------------------------------------------------------------------------------------------------------------------------------------------------------------|-------------------------------------------------|--------------------------------------------------------------------------------------------------------------|-------------------------------------------------------------------|-----------------------------------------------------------------------------------------------------------------------------------------------------------------------------------------------------------------------------------------------------------------------------------------------------------------------------------------------------------------------------------------------------|
| START BACK | (24,25)<br>STarT<br>Back  | <ul style="list-style-type: none"> <li>- Implement stratified care</li> <li>- Promote EBP/guideline-concordant care</li> <li>- Improve care effectiveness</li> <li>- Reduce costs</li> <li>- Optimize referrals for care and/or imaging</li> </ul> | Stratified (by prognosis)                       | PHC (general practices and PT-led back pain clinic)                                                          | GPs, nurses and PTs                                               | <ul style="list-style-type: none"> <li>- NHS (Primary Care Trusts).</li> <li>- General practices within the Keele GP Research Partnership (network of practices).</li> <li>- Underlying guidelines: Royal College of General Practitioners (1996), Working Group on Guidelines for the Management of Acute LBP in Primary Care (2006) and Arthritis and Musculoskeletal Alliance (2004).</li> </ul> |
|            | (36,46)<br>IMPACT<br>Back |                                                                                                                                                                                                                                                    |                                                 | PHC (general practices and community-based PT practices)                                                     | GPs and PTs                                                       | <ul style="list-style-type: none"> <li>- NHS (Primary Care Trusts).</li> <li>- Underlying guidelines: NICE guidelines (2009)</li> </ul>                                                                                                                                                                                                                                                             |
|            | (47)<br>Ireland           | <ul style="list-style-type: none"> <li>- Implement stratified care</li> <li>- Improve care effectiveness</li> <li>- Promote EBP/guideline-concordant care</li> <li>- Reduce healthcare resources use</li> </ul>                                    | Stratified (by prognosis)                       | PHC (PT-led spinal triage clinic - Back Pain Clinic)                                                         | GPs and PTs                                                       | <ul style="list-style-type: none"> <li>- NHS (Waterford City Primary Care)</li> <li>- Underlying guidelines: NICE guidelines for LBP (2009)</li> </ul>                                                                                                                                                                                                                                              |
|            | (48)<br>Denmark           | <ul style="list-style-type: none"> <li>- Implement stratified care</li> <li>- Improve care effectiveness</li> <li>- Promote EBP/guideline-concordant care</li> <li>- Reduce costs</li> <li>- Optimize referrals for care and/or imaging</li> </ul> | Stratified (by prognosis)                       | PHC (general practices and PT clinics)                                                                       | GPs and PTs                                                       | <ul style="list-style-type: none"> <li>- PHC from different geographical areas of the Regions of Southern and Central Denmark.</li> </ul>                                                                                                                                                                                                                                                           |
| SCOPIC     | (49,51)                   | <ul style="list-style-type: none"> <li>- Reduce wait times</li> <li>- Promote EBP/guideline-concordant care</li> <li>- Improve care effectiveness</li> <li>- Implement stratified care</li> </ul>                                                  | Stratified (by prognosis and pattern diagnosis) | PHC (general practices, community PT services), primary/secondary care interface services and secondary care | GPs, PTs, spinal specialist PTs and spinal surgeons               | <ul style="list-style-type: none"> <li>- NHS (Trusts)</li> <li>- General practices localized in a mix of urban, inner city, semi-rural and rural areas.</li> <li>- Spinal specialist services include specialist clinics at the primary/secondary care interface, spinal orthopaedic and pain clinic teams (treatments offered are part of NHS care).</li> </ul>                                    |
| MATCH      | (26,52)                   | <ul style="list-style-type: none"> <li>- Implement stratified care</li> <li>- Improve care effectiveness</li> <li>- Reduce healthcare utilization</li> <li>- Optimize referrals for care and/or imaging</li> </ul>                                 | Stratified (by prognosis)                       | PHC (clinics with onsite PT departments)                                                                     | Medical doctors, physician assistants/nurse practitioners and PTs | <ul style="list-style-type: none"> <li>- Integrated healthcare delivery system (Group Health);</li> <li>- Adaptation of the STarT Back approach: major differences concern the delivery of care, which follows the Group Health treatment guidelines.</li> </ul>                                                                                                                                    |
| TARGET     | (27–29)                   | <ul style="list-style-type: none"> <li>- Implement stratified care</li> <li>- Improve care effectiveness</li> <li>- Reduce healthcare resources use</li> <li>- Optimize referrals for care and/or imaging</li> </ul>                               | Stratified (by prognosis)                       | PHC (clinics)                                                                                                | PHC physicians and PTs                                            | <ul style="list-style-type: none"> <li>- Five health care systems (University of Pittsburgh Medical Center, Boston Medical Center, Johns Hopkins Medicine, Intermountain Health, Medical University of South Carolina) - network of PHC clinics in both urban and rural environments.</li> <li>- Directed to manage high-risk patients (according to SBST stratification).</li> </ul>               |
| BETTERBACK | (30,31,33)                | <ul style="list-style-type: none"> <li>- Promote EBP/guideline-concordant care</li> <li>- Improve care effectiveness</li> <li>- Promote integrated care</li> </ul>                                                                                 | Hybrid - Stratified/stepped                     | PHC (PT clinics)                                                                                             | PTs                                                               | <ul style="list-style-type: none"> <li>- Underlying guidelines: Best practice clinical guidelines of the Danish Health and Medicines Authority (2016) and the English NICE (2016) (adapted to the Swedish context)</li> </ul>                                                                                                                                                                       |

|                                     |                       |                                                                                                                                                                                                                                                                                                                        |                                                     |                                                                                 |                                                                                                               |                                                                                                                                                                                                                                                                                                                                                              |
|-------------------------------------|-----------------------|------------------------------------------------------------------------------------------------------------------------------------------------------------------------------------------------------------------------------------------------------------------------------------------------------------------------|-----------------------------------------------------|---------------------------------------------------------------------------------|---------------------------------------------------------------------------------------------------------------|--------------------------------------------------------------------------------------------------------------------------------------------------------------------------------------------------------------------------------------------------------------------------------------------------------------------------------------------------------------|
| Low Back and Radicular Pain Pathway | (34,35)<br>National   | <ul style="list-style-type: none"> <li>- Improve care effectiveness</li> <li>- Promote timely/equitable access to care</li> <li>- Promote EBP/guideline-concordant care</li> </ul>                                                                                                                                     | Hybrid – Stratified/stepped                         | PHC, Community Services, Secondary Care and Specialist Pain Management Services | GPs, PTs, chiropractors, osteopaths, pharmacists, TTPs, specialist spinal surgeon, multidisciplinary staffing | <ul style="list-style-type: none"> <li>- NHS</li> <li>- The implementation of the National Pathway is a decision of the Clinical Commissioning Groups, considering services and provision within their commissioning area.</li> <li>- TTPs play a core role in the pathway.</li> </ul>                                                                       |
|                                     | (37)<br>North         | <ul style="list-style-type: none"> <li>- Promote EBP/guideline-concordant care</li> <li>- Promote integrated care</li> <li>- Reduce wait times</li> <li>- Optimize referrals for care and/or imaging</li> </ul>                                                                                                        | Not reported                                        | PHC (outpatient PT service)                                                     | GPs and TTPs (specialized nurses and PTs)                                                                     | <ul style="list-style-type: none"> <li>- NHS (Community Trust)</li> <li>- Part of the national pathway (UK Low Back and Radicular Pain Pathway)</li> <li>- Underlying guidelines: NICE guidelines for LBP (2009)</li> </ul>                                                                                                                                  |
|                                     | (38,39)<br>North East |                                                                                                                                                                                                                                                                                                                        | Hybrid – Stratified/stepped                         | PHC, primary/secondary care interface services and secondary care               |                                                                                                               | <ul style="list-style-type: none"> <li>- Underlying guidelines: NICE guidelines for LBP (2009)</li> </ul>                                                                                                                                                                                                                                                    |
| BBPS                                | (40)                  | <ul style="list-style-type: none"> <li>- Promote EBP/guideline-concordant care</li> <li>- Reduce wait times</li> </ul>                                                                                                                                                                                                 | Hybrid - Stepped/Stratified (by patient preference) | PHC and community care                                                          | GPs, occupational therapists, acupuncturists, psychotherapists                                                | <ul style="list-style-type: none"> <li>- NHS (Primary Care Trust)</li> <li>- Underlying guidelines: NICE guidelines for LBP (2009)</li> </ul>                                                                                                                                                                                                                |
| North East Essex PCT service        | (41)                  | <ul style="list-style-type: none"> <li>- Improve care effectiveness</li> <li>- Promote timely/equitable access to care</li> <li>- Reduce wait times</li> <li>- Optimize referrals for care and/or imaging</li> <li>- Reduce healthcare resources use</li> </ul>                                                        | Hybrid - Stepped/Stratified (by patient preference) | PHC and community care (chiropractic, osteopathic and PT clinics)               | GPs, chiropractors, osteopaths and PTs                                                                        | <ul style="list-style-type: none"> <li>- NHS (North East Essex Primary Care Trust)</li> <li>- Underlying guidelines: NICE guidelines for LBP (2009)</li> </ul>                                                                                                                                                                                               |
| ISAEC                               | (42)                  | <ul style="list-style-type: none"> <li>- Promote EBP/guideline-concordant care</li> <li>- Reduce wait times</li> <li>- Optimize referrals for care and/or imaging</li> <li>- Promote integrated care</li> </ul>                                                                                                        | Stratified (by pattern diagnosis)                   | PHC and ISAEC clinics                                                           | Doctors, nurse practitioners, PTs, chiropractors, surgeons, pain specialists and rheumatologists              | <ul style="list-style-type: none"> <li>- Funded by the Ontario Ministry of Health and Long-Term Care to enable shared-care management of LBP.</li> <li>- Implemented in rural, urban and metropolitan settings.</li> </ul>                                                                                                                                   |
| SSP                                 | (43,44)               | <ul style="list-style-type: none"> <li>- Promote EBP/guideline-concordant care</li> <li>- Promote integrated care</li> <li>- Improve care effectiveness and efficiency</li> <li>- Reduce variations in practice patterns</li> <li>- Reduce wait times</li> <li>- Optimize referrals for care and/or imaging</li> </ul> | Stratified (by pattern diagnosis)                   | PHC and SSP clinics                                                             | Physicians, spine surgeons and specialized PTs                                                                | <ul style="list-style-type: none"> <li>- Pathway developed by spine surgeons.</li> <li>- It uses a multidisciplinary triage process and treatment algorithms based on the SSP classification.</li> <li>- The SSP classification defines 4 clinical patterns of symptoms and signs determined by history and physical examination.</li> </ul>                 |
| BAC                                 | (45)                  | <ul style="list-style-type: none"> <li>- Promote EBP/guideline-concordant care</li> <li>- Promote integrated care</li> <li>- Optimize referrals for care and/or imaging</li> <li>- Reduce wait times</li> </ul>                                                                                                        | Stepped                                             | PHC, tertiary neurosurgery and orthopaedic referral centre                      | Practice PTs, rheumatology registrars, rheumatologists, neurosurgeons, orthopaedic spinal surgeons            | <ul style="list-style-type: none"> <li>- BAC is a community-based specialist service for assessing and managing neck and LBP.</li> <li>- Pathway developed by health professionals of the Royal Melbourne Hospital (RMH), which serves as a tertiary neurosurgery and orthopaedic referral centre.</li> <li>- Rheumatologist coordinate BAC care.</li> </ul> |

**Abbreviations:** BAC – Back pain Assessment Clinic; BBPS – Beating Back Pain Service; EBP – Evidence-Based Practice; GPs – General Practitioner; ISAEC – Inter-professional Spine Assessment and Education Clinics; LBP – Low Back Pain; MoC – Model of Care; NERBPP – North East Low Back and Radicular Pain Pathway; NICE - National Institute of Health and Care Excellence; NHS – National Health System; PHC – Primary Healthcare; PT – Physiotherapy; PTs – Physiotherapists; SSP – Saskatchewan Spine Pathway; TTPs - Triage and Treat practitioners;

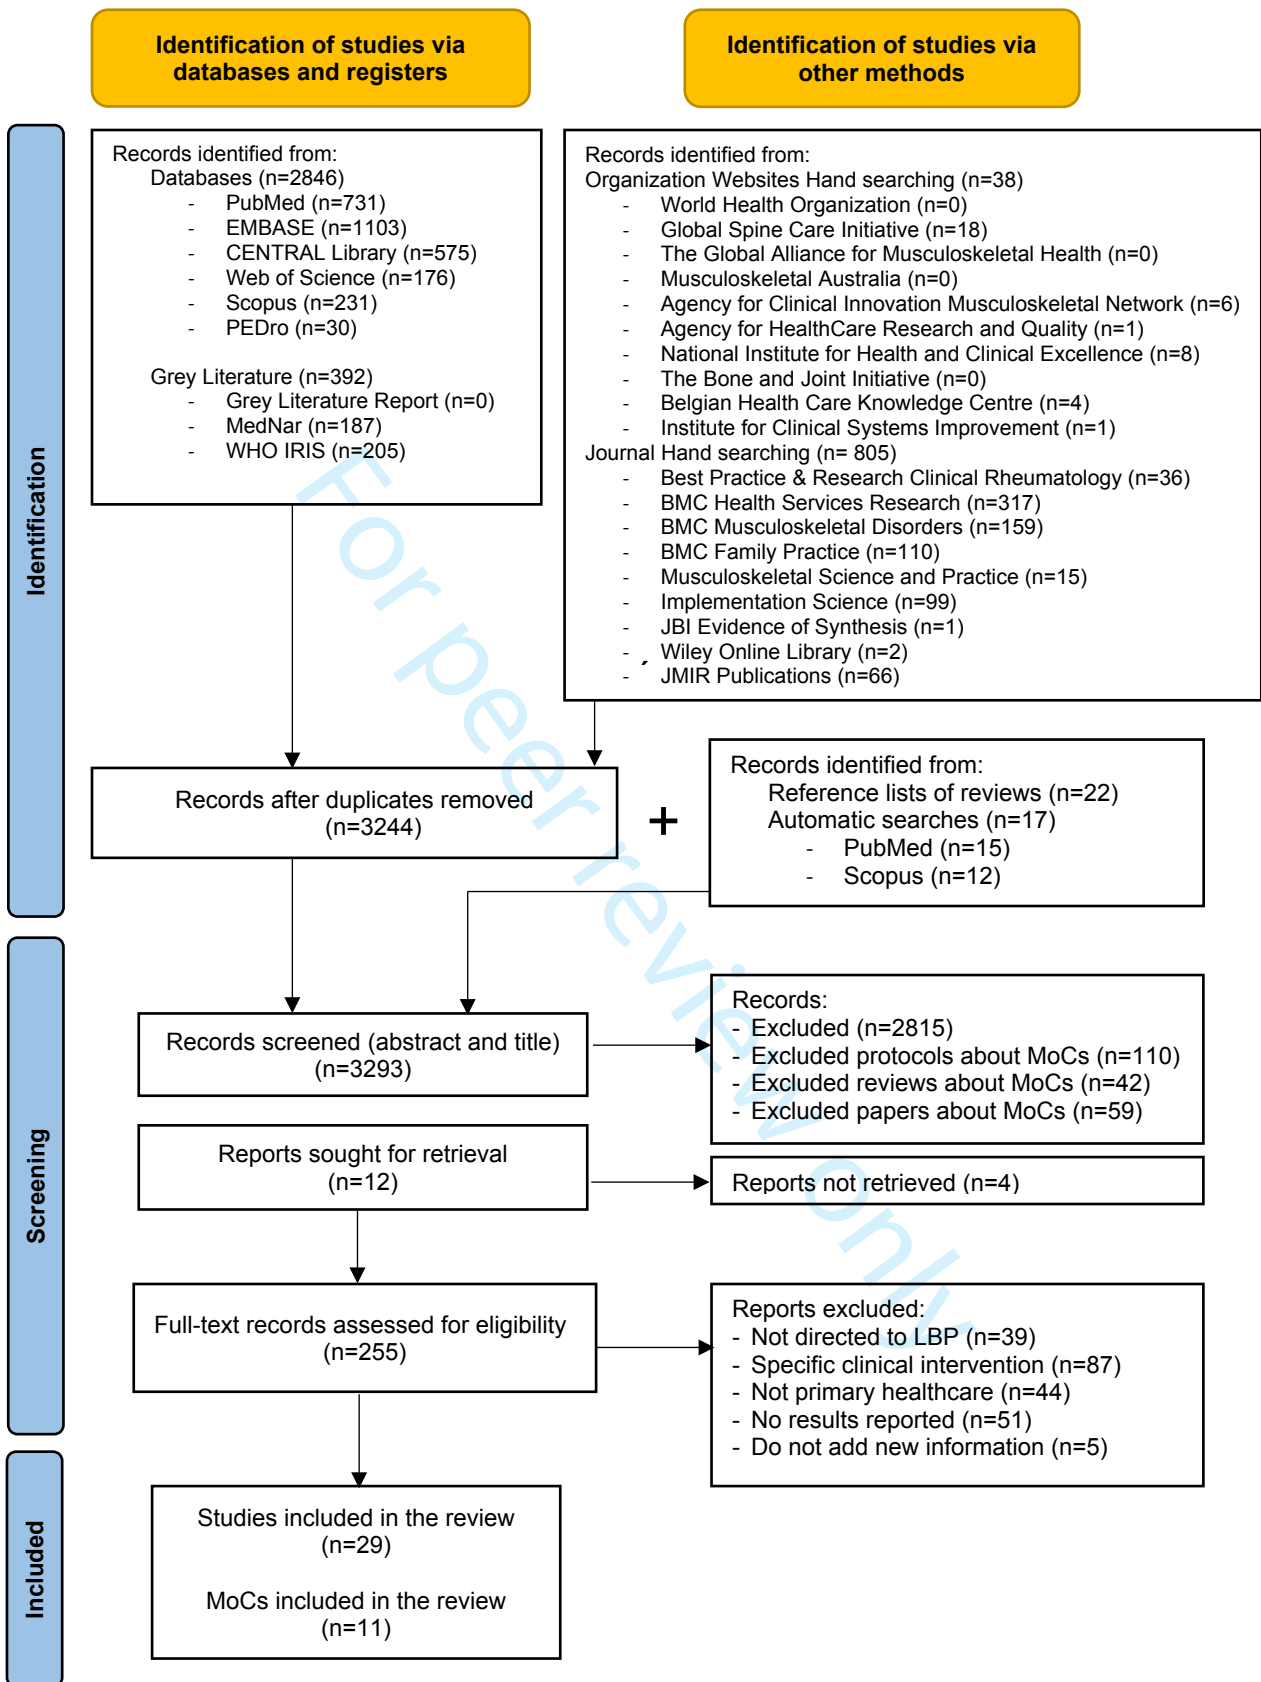

1  
2  
3  
4  
5  
6  
7  
8  
9  
10  
11  
12  
13  
14  
15  
16  
17  
18  
19  
20  
21  
22  
23  
24  
25  
26  
27  
28  
29  
30  
31  
32  
33  
34  
35  
36  
37  
38  
39  
40  
41  
42  
43  
44  
45  
46  
47  
48  
49  
50  
51  
52  
53  
54  
55  
56  
57  
58  
59  
60

### Distribution of models of care for low back pain

Australia Canada Denmark Ireland Sweden United Kingdom United States of America

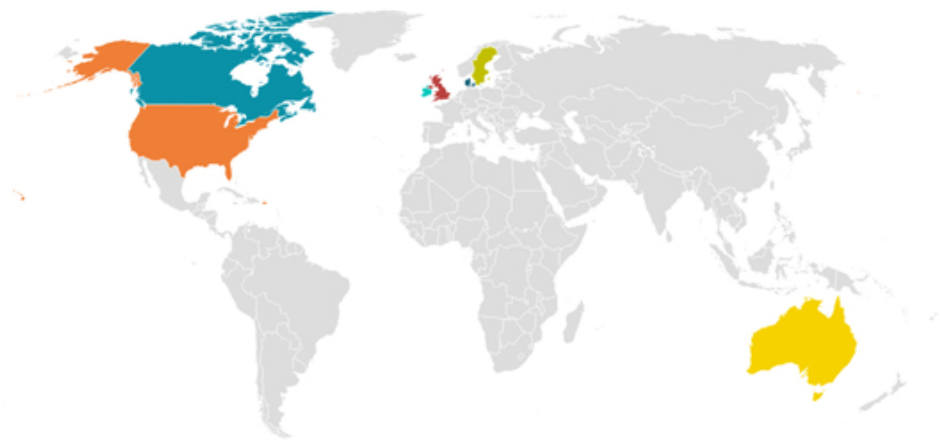

Created with Datawrapper

47x30mm (300 x 300 DPI)

**Type of care offered by the models of care**

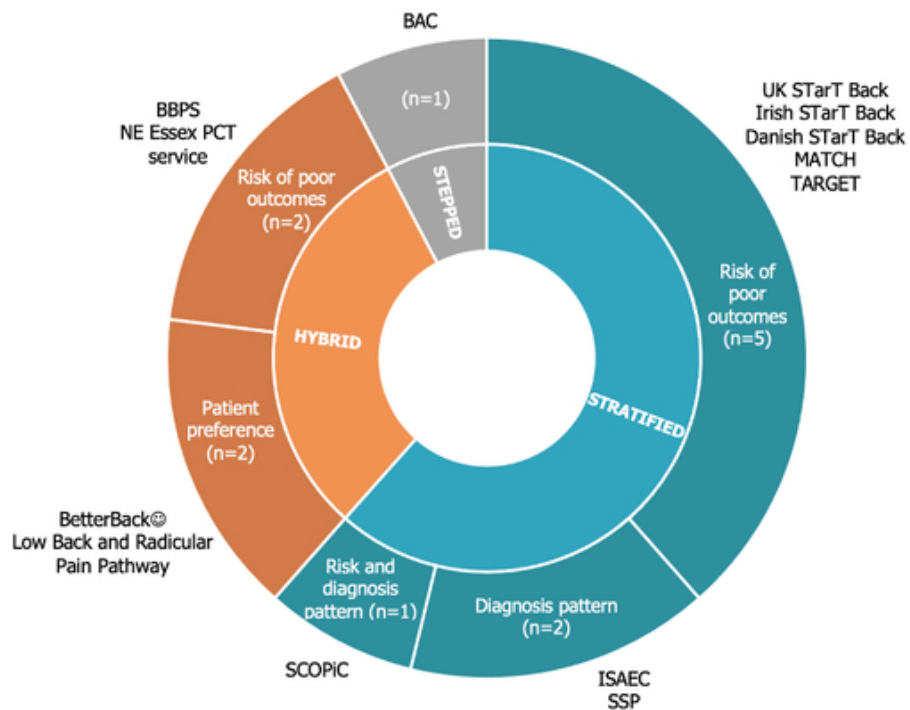

47x38mm (300 x 300 DPI)



| SECTION                           | ITEM | PRISMA-ScR CHECKLIST ITEM                                                                                                                                                                                                                                                 | REPORTED ON PAGE #                                                                                                             |
|-----------------------------------|------|---------------------------------------------------------------------------------------------------------------------------------------------------------------------------------------------------------------------------------------------------------------------------|--------------------------------------------------------------------------------------------------------------------------------|
| <b>TITLE</b>                      |      |                                                                                                                                                                                                                                                                           |                                                                                                                                |
| Title                             | 1    | Identify the report as a scoping review.                                                                                                                                                                                                                                  | Title page – page 1                                                                                                            |
| <b>ABSTRACT</b>                   |      |                                                                                                                                                                                                                                                                           |                                                                                                                                |
| Structured summary                | 2    | Provide a structured summary that includes (as applicable): background, objectives, eligibility criteria, sources of evidence, charting methods, results, and conclusions that relate to the review questions and objectives.                                             | Abstract – page 2                                                                                                              |
| <b>INTRODUCTION</b>               |      |                                                                                                                                                                                                                                                                           |                                                                                                                                |
| Rationale                         | 3    | Describe the rationale for the review in the context of what is already known. Explain why the review questions/objectives lend themselves to a scoping review approach.                                                                                                  | Pages 4 and 5                                                                                                                  |
| Objectives                        | 4    | Provide an explicit statement of the questions and objectives being addressed with reference to their key elements (e.g., population or participants, concepts, and context) or other relevant key elements used to conceptualize the review questions and/or objectives. | Introduction section – last sentence (page 5);<br>Methods section – Research question (page 5) and Inclusion criteria (page 6) |
| <b>METHODS</b>                    |      |                                                                                                                                                                                                                                                                           |                                                                                                                                |
| Protocol and registration         | 5    | Indicate whether a review protocol exists; state if and where it can be accessed (e.g., a Web address); and if available, provide registration information, including the registration number.                                                                            | Page 5                                                                                                                         |
| Eligibility criteria              | 6    | Specify characteristics of the sources of evidence used as eligibility criteria (e.g., years considered, language, and publication status), and provide a rationale.                                                                                                      | Inclusion criteria and Search Strategy (page 6 and 7)                                                                          |
| Information sources*              | 7    | Describe all information sources in the search (e.g., databases with dates of coverage and contact with authors to identify additional sources), as well as the date the most recent search was executed.                                                                 | Search strategy (pages 6 and 7)                                                                                                |
| Search                            | 8    | Present the full electronic search strategy for at least 1 database, including any limits used, such that it could be repeated.                                                                                                                                           | Supplementary File 2                                                                                                           |
| Selection of sources of evidence† | 9    | State the process for selecting sources of evidence (i.e., screening and eligibility) included in the scoping review.                                                                                                                                                     | Study selection (page 7)                                                                                                       |
| Data charting process‡            | 10   | Describe the methods of charting data from the included sources of evidence (e.g., calibrated forms or forms that have been tested by the team before their use, and whether data charting was done independently or in duplicate) and                                    | Data charting (pages 7 and 8); supplementary File 3                                                                            |

| SECTION                                              | ITEM | PRISMA-ScR CHECKLIST ITEM                                                                                                                                                                             | REPORTED ON PAGE #                                  |
|------------------------------------------------------|------|-------------------------------------------------------------------------------------------------------------------------------------------------------------------------------------------------------|-----------------------------------------------------|
|                                                      |      | any processes for obtaining and confirming data from investigators.                                                                                                                                   |                                                     |
| Data items                                           | 11   | List and define all variables for which data were sought and any assumptions and simplifications made.                                                                                                | Data charting (pages 7 and 8); Supplementary File 3 |
| Critical appraisal of individual sources of evidence | 12   | If done, provide a rationale for conducting a critical appraisal of included sources of evidence; describe the methods used and how this information was used in any data synthesis (if appropriate). | Not applicable                                      |
| Synthesis of results                                 | 13   | Describe the methods of handling and summarizing the data that were charted.                                                                                                                          | Synthesis and presentation of results (page 8)      |
| <b>RESULTS</b>                                       |      |                                                                                                                                                                                                       |                                                     |
| Selection of sources of evidence                     | 14   | Give numbers of sources of evidence screened, assessed for eligibility, and included in the review, with reasons for exclusions at each stage, ideally using a flow diagram.                          | Literature search (page 9); Figure 1                |
| Characteristics of sources of evidence               | 15   | For each source of evidence, present characteristics for which data were charted and provide the citations.                                                                                           | Page 9; Table 1                                     |
| Critical appraisal within sources of evidence        | 16   | If done, present data on critical appraisal of included sources of evidence (see item 12).                                                                                                            | Not applicable                                      |
| Results of individual sources of evidence            | 17   | For each included source of evidence, present the relevant data that were charted that relate to the review questions and objectives.                                                                 | Pages 9 to 13                                       |
| Synthesis of results                                 | 18   | Summarize and/or present the charting results as they relate to the review questions and objectives.                                                                                                  | Pages 9 to 13                                       |
| <b>DISCUSSION</b>                                    |      |                                                                                                                                                                                                       |                                                     |
| Summary of evidence                                  | 19   | Summarize the main results (including an overview of concepts, themes, and types of evidence available), link to the review questions and objectives, and consider the relevance to key groups.       | Page 13 - First paragraph                           |
| Limitations                                          | 20   | Discuss the limitations of the scoping review process.                                                                                                                                                | Page 15                                             |
| Conclusions                                          | 21   | Provide a general interpretation of the results with respect to the review questions and objectives, as well as potential implications and/or next steps.                                             | Page 16                                             |
| <b>FUNDING</b>                                       |      |                                                                                                                                                                                                       |                                                     |
| Funding                                              | 22   | Describe sources of funding for the included sources of evidence, as well as sources of funding for the scoping review. Describe the role of the funders of the scoping review.                       | Page 16                                             |

MEDLINE (Pubmed) – January 13<sup>th</sup>, 2022

| Search                                                         | Query                                                                                                                                                                                                                                                                                                                                                                                                                                                                                                                                                                                                                                                                                                                                                                                                                                                                                                                                                                                                                                                                                                                                                                                                                                                                                                                                                                                            | Records retrieved |
|----------------------------------------------------------------|--------------------------------------------------------------------------------------------------------------------------------------------------------------------------------------------------------------------------------------------------------------------------------------------------------------------------------------------------------------------------------------------------------------------------------------------------------------------------------------------------------------------------------------------------------------------------------------------------------------------------------------------------------------------------------------------------------------------------------------------------------------------------------------------------------------------------------------------------------------------------------------------------------------------------------------------------------------------------------------------------------------------------------------------------------------------------------------------------------------------------------------------------------------------------------------------------------------------------------------------------------------------------------------------------------------------------------------------------------------------------------------------------|-------------------|
| #1                                                             | ((“back pain” [MesH]) OR (“back pain” [tiab]) OR (“low-back pain” [MesH]) OR (“low back pain” [tiab]) OR (“sciatica” [MesH]) OR (“sciatica neuropathy” [MesH]) OR (“sciatica” [tiab]) OR (“backache” [tiab]) OR (“back ache” [tiab]) OR (“lumb* pain” [tiab]) OR (“lumbago” [tiab]) OR (“spinal pain” [tiab]) OR (“spondylosis” [tiab]) OR (“back disorder” [tiab]))                                                                                                                                                                                                                                                                                                                                                                                                                                                                                                                                                                                                                                                                                                                                                                                                                                                                                                                                                                                                                             | 91 347            |
| #2                                                             | ((“Models, Organizational”[MesH]) OR ((theor*[tiab] OR concept*[tiab] OR framework*[tiab] OR model*[tiab] OR program*[tiab] OR approach*[tiab])) AND ((“critical pathways”[MeSH] OR “model of care”[tiab] OR “care model”[tiab] OR “functional integration”[tiab] OR “clinical integration”[tiab] OR “case management”[MeSH] OR “delivery of health care, integrated”[MeSH] OR “disease management”[MeSH] OR “patient care management”[MeSH] OR “patient-centered care”[MeSH] OR “continuity of patient care”[MeSH] OR “comprehensive health care”[MeSH] OR “managed care program”[tiab] OR “multidisciplinary care”[tiab] OR “interdisciplinary care”[tiab] OR “inter-disciplinary care”[tiab] OR “cross disciplinary care”[tiab] OR “cross-disciplinary care”[tiab] OR “multiple interventions”[tiab] OR “care chain”[tiab] OR “care chains”[tiab] OR “care continuity”[tiab] OR “care continuation”[tiab] OR “care transition”[tiab] OR “chain of care”[tiab] OR “continuity of care”[tiab] OR “cross sectoral care”[tiab] OR “integrated health care”[tiab] OR “integrated medicine”[tiab] OR “integrated social network”[tiab] OR “integration of care”[tiab] OR “intersectoral care”[tiab] OR “linked care”[tiab] OR “management model”[tiab] OR “service network”[tiab] OR “transition of care”[tiab] OR “transitional care”[tiab] OR “transmural care”[tiab] OR “holistic care”[tiab]))) | 384 556           |
| #3                                                             | ("primary health care"[MeSH] OR (("primary"[tiab] AND "health"[tiab]) AND "care"[tiab])) OR ("primary health care"[tiab] OR ("primary"[tiab] AND "care"[tiab]) OR "primary care"[tiab])) OR ("general practice"[MeSH] OR ("general"[tiab] AND "practice"[tiab]) OR "general practice"[tiab])) OR ("general"[tiab] AND "medicine"[tiab]) OR "general medicine"[tiab]) OR ("family practice"[MeSH] OR ("family"[tiab] AND "practice"[tiab]) OR "family practice"[tiab])) OR ("family"[tiab] AND "medicine"[tiab]) OR "family medicine"[tiab]) OR ("primaries"[tiab] OR "primary"[tiab]) AND "servic*" [tiab])                                                                                                                                                                                                                                                                                                                                                                                                                                                                                                                                                                                                                                                                                                                                                                                      | 597 247           |
| #4                                                             | #1 AND #2 AND #3                                                                                                                                                                                                                                                                                                                                                                                                                                                                                                                                                                                                                                                                                                                                                                                                                                                                                                                                                                                                                                                                                                                                                                                                                                                                                                                                                                                 | 854               |
| <b>Limited to: since 2000, English, Portuguese and Spanish</b> |                                                                                                                                                                                                                                                                                                                                                                                                                                                                                                                                                                                                                                                                                                                                                                                                                                                                                                                                                                                                                                                                                                                                                                                                                                                                                                                                                                                                  | 731               |

| SUMMARY OF THE PAPER                                                                                |                                                                                                                                                                                                                |
|-----------------------------------------------------------------------------------------------------|----------------------------------------------------------------------------------------------------------------------------------------------------------------------------------------------------------------|
| <b>Title</b>                                                                                        |                                                                                                                                                                                                                |
| <b>Authors</b>                                                                                      |                                                                                                                                                                                                                |
| <b>Year of publication</b>                                                                          |                                                                                                                                                                                                                |
| <b>Source of information</b><br><i>(Peer review or grey literature)</i>                             |                                                                                                                                                                                                                |
| <b>Study design</b><br><i>(Define intervention vs control group, if applicable)</i>                 |                                                                                                                                                                                                                |
| <b>Objectives</b>                                                                                   |                                                                                                                                                                                                                |
| <b>Population</b><br><i>(Include inclusion and exclusion criteria)</i>                              |                                                                                                                                                                                                                |
| <b>Sample size</b><br><i>(Intervention vs control group, if applicable)</i>                         |                                                                                                                                                                                                                |
| IDENTIFICATION OF THE MoC                                                                           |                                                                                                                                                                                                                |
| <b>Name or Acronym</b> <i>(if applicable)</i>                                                       |                                                                                                                                                                                                                |
| <b>Country</b>                                                                                      |                                                                                                                                                                                                                |
| <b>Other references</b><br><i>(Protocol, other studies, if applicable)</i>                          |                                                                                                                                                                                                                |
| <b>Goals of the MoC</b>                                                                             |                                                                                                                                                                                                                |
| <b>Funding</b><br><i>(How the MoC is funded and how is it sustained at long-term)</i>               | E.g., research funding or funding at a system level                                                                                                                                                            |
| CORE COMPONENTS OF THE MoC <sup>(1-3)</sup>                                                         |                                                                                                                                                                                                                |
| <b>Underlying theories, models or frameworks</b> <sup>(2)</sup>                                     | <b>Process models/frameworks</b><br><i>(e.g., CIHR Model of Knowledge Translation, ACE Star Model of Knowledge Transformation, Knowledge-to-Action Model, Ottawa Model, Quality Implementation Framework).</i> |
| <b>Process models/frameworks</b><br><i>Definition: Describe or guide the process of translating</i> |                                                                                                                                                                                                                |

|                                                                                                                                                                                                                                                                                                                                                                                                                                                                                                                                                                                                                                                                                                                                                                                                                                                                                                                                                                                                                                                                                                                                                                                                                                                                                                         |                                                                                                                                                                                                                                                                                                                                                                                                                                                                                                                                                                                                                                                                                                                                                                                                                                                                                                                                    |
|---------------------------------------------------------------------------------------------------------------------------------------------------------------------------------------------------------------------------------------------------------------------------------------------------------------------------------------------------------------------------------------------------------------------------------------------------------------------------------------------------------------------------------------------------------------------------------------------------------------------------------------------------------------------------------------------------------------------------------------------------------------------------------------------------------------------------------------------------------------------------------------------------------------------------------------------------------------------------------------------------------------------------------------------------------------------------------------------------------------------------------------------------------------------------------------------------------------------------------------------------------------------------------------------------------|------------------------------------------------------------------------------------------------------------------------------------------------------------------------------------------------------------------------------------------------------------------------------------------------------------------------------------------------------------------------------------------------------------------------------------------------------------------------------------------------------------------------------------------------------------------------------------------------------------------------------------------------------------------------------------------------------------------------------------------------------------------------------------------------------------------------------------------------------------------------------------------------------------------------------------|
| <p>research into practice, including the implementation and use of research. Provide practical guidance in the planning and execution of implementation endeavors and/or implementation strategies to facilitate implementation.</p> <p><b>Determinant frameworks</b><br/> <i>Definition: Frameworks that identify determinants, which act as barriers and enablers (independent variables) that influence implementation outcomes (dependent variables), such as predicting outcomes or interpreting outcomes retrospectively. Some frameworks also specify relationships between some types of determinants.</i></p> <p><b>Classic theories</b><br/> <i>Definition: Theories that originate from fields external to implementation science, such as psychology, sociology and organizational theory, which can be applied to provide understanding and/or explanation of aspects of implementation.</i></p> <p><b>Implementation theories/frameworks</b><br/> <i>Definition: Theories/frameworks that have been developed by implementation researchers to provide understanding and/or explanation of aspects of implementation.</i></p> <p><b>Evaluation frameworks</b><br/> <i>Definition: Identify aspects of implementation that could be evaluated to determine implementation success.</i></p> | <p><b>Determinant frameworks, classic theories or implementation frameworks</b><br/> <i>Definition: Understand and explain what influences implementation outcomes.</i></p> <ul style="list-style-type: none"> <li>• <b>Determinant frameworks</b> (e.g., Theoretical Domains Framework, PARIHS, CFIR, Active Implementation Framework, Understanding-User-Context Framework).</li> <li>• <b>Classic theories</b> (e.g., Theory of Diffusion, social cognitive theories, theories concerning cognitive processes and decision making, social networks theories, communities of practice, professional theories, organizational theories).</li> <li>• <b>Implementation theories/frameworks</b> (e.g., COM-B, Implementation Climate, Absorptive Capacity, Organizational Readiness, Normalization Process Theory)</li> </ul> <p><b>Evaluation frameworks</b><br/> (e.g., RE-AIM, PRECEDE-PROCEED, framework by Proctor et al.)</p> |
| <p><b>Setting</b><br/> <i>(Describe the settings where assessment/care/other is provided)</i></p>                                                                                                                                                                                                                                                                                                                                                                                                                                                                                                                                                                                                                                                                                                                                                                                                                                                                                                                                                                                                                                                                                                                                                                                                       | <p>E.g., Assessment – Primary care; Delivery of care – private outpatient clinic</p>                                                                                                                                                                                                                                                                                                                                                                                                                                                                                                                                                                                                                                                                                                                                                                                                                                               |
| <p><b>Care pathway</b><br/> <i>(Summary description of the care pathway)</i></p>                                                                                                                                                                                                                                                                                                                                                                                                                                                                                                                                                                                                                                                                                                                                                                                                                                                                                                                                                                                                                                                                                                                                                                                                                        | <p>E.g., Community pharmacist consultation [evaluation, education and medication review] – GP referral and PT referral – PT guided exercise program (only if approved by the GP), re-assessed in 3-6 weeks</p>                                                                                                                                                                                                                                                                                                                                                                                                                                                                                                                                                                                                                                                                                                                     |
| <p><b>Characteristics of the intervention</b></p>                                                                                                                                                                                                                                                                                                                                                                                                                                                                                                                                                                                                                                                                                                                                                                                                                                                                                                                                                                                                                                                                                                                                                                                                                                                       | <p>E.g., Education + exercise: two patient education sessions and a supervised exercise program twice a week for 6 weeks in a group setting.</p>                                                                                                                                                                                                                                                                                                                                                                                                                                                                                                                                                                                                                                                                                                                                                                                   |

|                                                                                                                                                                                                                                                                                                                                                                                                                                                                                                                                                               |                                                                                                                                                                                                                                                                                                                                                                                                                                                          |
|---------------------------------------------------------------------------------------------------------------------------------------------------------------------------------------------------------------------------------------------------------------------------------------------------------------------------------------------------------------------------------------------------------------------------------------------------------------------------------------------------------------------------------------------------------------|----------------------------------------------------------------------------------------------------------------------------------------------------------------------------------------------------------------------------------------------------------------------------------------------------------------------------------------------------------------------------------------------------------------------------------------------------------|
| <p>(Describe the interventions - what care is provided, by who and for how long)</p>                                                                                                                                                                                                                                                                                                                                                                                                                                                                          | <p>Education: encourage the patients to actively engage in the management of LBP – group sessions – first about LBP, treatment options (including exercise).</p> <p>Exercise: 6 weeks, twice a week of supervised, targeted and individualized exercise in a group setting; home exercises were encouraged as individuals developed quality movement and participants were encouraged to increase their engagement in enjoyable physical activities.</p> |
| <p><b>Care Coordination<sup>(3)</sup></b><br/> <i>Definition: Care coordination is the deliberate organization of patient care activities between two or more participants (including the patient) involved in a patient's care to facilitate the appropriate delivery of health care services. Organizing care involves the marshalling of personnel and other resources needed to carry out all required patient care activities, and is often managed by the exchange of information among participants responsible for different aspects of care.</i></p> | <p><b>Health professionals involved</b></p> <p><b>Care Coordination</b><br/> <i>(Summary description of who is involved in providing care and how care is coordinated)</i></p> <p><b>Exchange of clinical information</b><br/> <i>(e.g., tools to record clinical data, meetings, case manager)</i></p>                                                                                                                                                  |
| <b>IMPLEMENTATION STRATEGY</b>                                                                                                                                                                                                                                                                                                                                                                                                                                                                                                                                |                                                                                                                                                                                                                                                                                                                                                                                                                                                          |
| <p><b>Duration</b></p>                                                                                                                                                                                                                                                                                                                                                                                                                                                                                                                                        |                                                                                                                                                                                                                                                                                                                                                                                                                                                          |
| <p><b>Implementation Strategies<sup>(4)</sup></b><br/> <i>Definition: methods or techniques used to enhance the adoption, implementation, and sustainability of a clinical program or practice</i></p>                                                                                                                                                                                                                                                                                                                                                        |                                                                                                                                                                                                                                                                                                                                                                                                                                                          |
| <p><b>Workforce capacity</b><br/> <i>(Description of the training for health professionals, staff or other team members)</i></p>                                                                                                                                                                                                                                                                                                                                                                                                                              |                                                                                                                                                                                                                                                                                                                                                                                                                                                          |
| <p><b>Barriers and Facilitators to Implementation</b></p>                                                                                                                                                                                                                                                                                                                                                                                                                                                                                                     |                                                                                                                                                                                                                                                                                                                                                                                                                                                          |
| <b>CONTEXT SPECIFIC COMPONENTS OF THE MoC(5,6)</b>                                                                                                                                                                                                                                                                                                                                                                                                                                                                                                            |                                                                                                                                                                                                                                                                                                                                                                                                                                                          |
| <p><b>Micro/Patient level factors</b><br/> <i>Patients' preferences, expectancies, attitudes, knowledge, needs and resources that can influence implementation; specific geographic areas with different access to health services, sub-populations with special socio-demographic and clinical characteristics.</i></p>                                                                                                                                                                                                                                      |                                                                                                                                                                                                                                                                                                                                                                                                                                                          |
| <p><b>Meso/Organizational level factors</b></p> <p><b>Organizational culture and climate</b></p>                                                                                                                                                                                                                                                                                                                                                                                                                                                              |                                                                                                                                                                                                                                                                                                                                                                                                                                                          |

1  
2  
3  
4  
5  
6  
7  
8  
9  
10  
11  
12  
13  
14  
15  
16  
17  
18  
19  
20  
21  
22  
23  
24  
25  
26  
27  
28  
29  
30  
31  
32  
33  
34  
35  
36  
37  
38  
39  
40  
41  
42  
43  
44  
45  
46

*Shared visions, norms, values, assumptions and expectations in an organization that can influence implementation (i.e., organizational culture) and surface perceptions and attitudes concerning the observable, surface-level aspects of culture (i.e. climate).*

**Organizational readiness to change**

*Influences on implementation related to an organization’s tension, commitment or preparation to implement change, the presence of a receptive or absorptive context for change, the organization’s prioritization of implementing change, the organization’s efficacy or ability to implement change, practicality and the organization’s flexibility and innovativeness.*

**Organizational Support**

*Various forms of support that can influence implementation, including administration, planning and organization of work, availability of staff, staff workload, staff training, material resources, information and decision-support systems, consultant support and structures for learning.*

**Organizational structures**

*Influences on implementation related to structural characteristics of the organization in which implementation occurs, including size, complexity, specialization, differentiation and decentralization of the organization.*

**Macro/External level factors**

*Exogeneous influences on implementation in health care organizations, including policies, guidelines, research findings, evidence, regulation, legislation, mandates, directives, recommendations, political stability, public reporting, benchmarking and organizational networks.*

**Multiple level factors**

**Social relations and support**

*Interpersonal processes, including communication, collaboration and learning in groups, teams and networks, visions, conformity, identity and norms in groups, opinion of colleagues, homophily (tendency of individuals to associate and bond with similar others) and alienation.*

|                                                                                                                                                                                                                                                                                                                                                                                                                                                                                                                                                                                                                                                                                                                                                                                                                                |                                                                          |                       |
|--------------------------------------------------------------------------------------------------------------------------------------------------------------------------------------------------------------------------------------------------------------------------------------------------------------------------------------------------------------------------------------------------------------------------------------------------------------------------------------------------------------------------------------------------------------------------------------------------------------------------------------------------------------------------------------------------------------------------------------------------------------------------------------------------------------------------------|--------------------------------------------------------------------------|-----------------------|
| <p><b>Financial resources</b><br/><i>Funding, reimbursement, incentives, rewards, costs and other economic factors that can influence implementation.</i></p> <p><b>Leadership</b><br/><i>Influences on implementation related to formal and informal leaders, including managers, key individuals, change agents, opinion leaders, champions, etc.</i></p> <p><b>Time availability</b><br/><i>Time restrictions that can influence implementation.</i></p> <p><b>Feedback</b><br/><i>Evaluation, assessment and various forms of mechanisms that can monitor and feedback results concerning the implementation, which can influence implementation.</i></p> <p><b>Physical environment</b><br/><i>Features of the physical environment that can influence implementation (e.g., equipment, facilities and supplies).</i></p> |                                                                          |                       |
| <b>OUTCOMES(1,7) AND RESULTS</b>                                                                                                                                                                                                                                                                                                                                                                                                                                                                                                                                                                                                                                                                                                                                                                                               |                                                                          |                       |
| <p><b>Patient level outcomes</b><br/><i>Definition: impact of the model of care on patients (e.g., pain, function or quality of life, satisfaction, collected with self-reported questionnaires or interview questionnaires or performance measures, at baseline and 3-month follow-up)</i></p>                                                                                                                                                                                                                                                                                                                                                                                                                                                                                                                                | <p><b>Outcomes</b><br/><b>Outcome measures</b><br/><b>Follow-ups</b></p> | <p><b>Results</b></p> |
| <p><b>Organizational level outcomes</b><br/><i>Definition: impact on health services, providers or on health-system (e.g., rate of referral or prescription for exercise, rate of prescribed exams, healthcare costs, waiting times – collected with administrative/clinical databases, quality indicators, questionnaires or interviews with providers)</i></p>                                                                                                                                                                                                                                                                                                                                                                                                                                                               | <p><b>Outcomes</b><br/><b>Outcome measures</b><br/><b>Follow-ups</b></p> | <p><b>Results</b></p> |
| <p><b>Implementation level outcomes</b><br/><i>Definition: Effects of deliberate and purposive actions to implement new treatments, practices, and services. Implementation outcomes serve as indicators of the implementation success and are key intermediate outcomes in relation to service system or clinical outcomes in treatment</i></p>                                                                                                                                                                                                                                                                                                                                                                                                                                                                               | <p><b>Outcomes</b><br/><b>Outcome measures</b><br/><b>Follow-ups</b></p> | <p><b>Results</b></p> |



|                                                                                                                                                         |  |  |
|---------------------------------------------------------------------------------------------------------------------------------------------------------|--|--|
| <i>effectiveness and quality of care research – Acceptability; Adoption; Appropriateness; Costs; Feasibility; Fidelity; Penetration; Sustainability</i> |  |  |
|---------------------------------------------------------------------------------------------------------------------------------------------------------|--|--|

**References**

1. Briggs AM, Jordan JE, Jennings M, Speerin R, Chua J, Bragge P, et al. A Framework to Evaluate Musculoskeletal Models of Care [Internet]. Cornwall, UK; 2016.
2. Nilsen P. Making sense of implementation theories, models and frameworks. *Implement Sci.* 2015;10(1):1–13. doi: 10.1186/s13012-015-0242-0
3. Schultz EM, McDonald KM. What is care coordination? *Int J Care Coord* [Internet]. 2014;17(1–2):5–24.
4. Powell BJ, Waltz TJ, Chinman MJ, Damschroder LJ, Smith JL, Matthieu MM, et al. A refined compilation of implementation strategies: Results from the Expert Recommendations for Implementing Change (ERIC) project. *Implement Sci* [Internet]. 2015;10(1):1–14.
5. Nilsen P, Bernhardsson S. Context matters in implementation science: A scoping review of determinant frameworks that describe contextual determinants for implementation outcomes. *BMC Health Serv Res* [Internet]. 2019;19(1):1–21.
6. Lau R, Stevenson F, Ong BN, Dziedzic K, Treweek S, Eldridge S, et al. Achieving change in primary care-causes of the evidence to practice gap: Systematic reviews of reviews. *Implement Sci.* 2016;11(1). doi: 10.1186/s13012-016-0396-4
7. Proctor E, Silmere H, Raghavan R, Hovmand P, Aarons G, Bunger A, et al. Outcomes for implementation research: Conceptual distinctions, measurement challenges, and research agenda. *Adm Policy Ment Heal Ment Heal Serv Res* [Internet]. 2011;38(2):65–76.

**Additional File 4 – Description of the included studies**

| MoC design<br>ation                           | Study                       | Population                                                                                                                                                                                                                                                              | Sample Size                                                     | Outcome<br>Domains<br>(Follow-ups) | Outcomes (outcome measures)                                                                                                                                                                                                                                                                                                                                                                                                                                                                                                                                                              |                                                                                           |                                |                                                                                                                                                                                                                                                                                                                                                                                                                                                                                                                                                 |
|-----------------------------------------------|-----------------------------|-------------------------------------------------------------------------------------------------------------------------------------------------------------------------------------------------------------------------------------------------------------------------|-----------------------------------------------------------------|------------------------------------|------------------------------------------------------------------------------------------------------------------------------------------------------------------------------------------------------------------------------------------------------------------------------------------------------------------------------------------------------------------------------------------------------------------------------------------------------------------------------------------------------------------------------------------------------------------------------------------|-------------------------------------------------------------------------------------------|--------------------------------|-------------------------------------------------------------------------------------------------------------------------------------------------------------------------------------------------------------------------------------------------------------------------------------------------------------------------------------------------------------------------------------------------------------------------------------------------------------------------------------------------------------------------------------------------|
| START BACK – Subgroups for Targeted Treatment | Hill et al. (2011)(1)       | - Inclusion: LBP of any duration, ≥18 years-old, with or without radiculopathy.<br><br>- Exclusion: serious illness or spinal pathology, serious comorbidity (including mental disorders), surgery in the last 6 months, pregnancy, currently receiving back treatment. | N=851 patients<br><br>- Intervention: n=568<br>- Control: n=283 | Patient<br>(4 and 12 mo)           | <b>4 and 12 months</b><br>- <b>Primary outcome:</b> Disability [Roland Morris Disability Questionnaire (RMDQ)] at 12 months; Back pain intensity (NRS); Catastrophizing [Pain Catastrophizing Scale (PCS)]; Fear-avoidance beliefs [Tampa Scale of Kinesiophobia (TSK)]; Anxiety and depression [Hospital Anxiety and Depression Scale (HADS)]; Health-related quality of life [EuroQol EQ-5D; Short Form 12 (SF-12)]; Risk subgroup reduction [STarT Back Screening Tool (SBST)]; Global change (single question); Adverse events<br><br><b>12 Months</b><br>- Work loss (one question) |                                                                                           |                                |                                                                                                                                                                                                                                                                                                                                                                                                                                                                                                                                                 |
|                                               |                             |                                                                                                                                                                                                                                                                         |                                                                 | Organizational<br>(4 and 12 mo)    | <b>Process of care [Case Report Forms (CRFs)]</b><br>- Referral for further PT; Number of PT sessions; Attendance at initial PT<br><br><b>4 months</b><br>- Patient satisfaction (self-reported questionnaire)<br><br><b>12 months</b><br>- Healthcare resource use (self-reported questionnaire); cost-utility (QALYs estimates using the EuroQol EQ-5D)                                                                                                                                                                                                                                |                                                                                           |                                |                                                                                                                                                                                                                                                                                                                                                                                                                                                                                                                                                 |
|                                               | Whitehurst et al. (2012)(2) |                                                                                                                                                                                                                                                                         |                                                                 | Patient<br>(4 and 12 mo)           | <b>4 and 12 months</b><br>- Health-related quality of life [EQ-5D]<br><br><b>12 months</b><br>- Work-related outcomes - Employment status (self-reported questionnaire)                                                                                                                                                                                                                                                                                                                                                                                                                  |                                                                                           |                                |                                                                                                                                                                                                                                                                                                                                                                                                                                                                                                                                                 |
|                                               |                             |                                                                                                                                                                                                                                                                         |                                                                 | Organizational<br>(4 and 12 mo)    | <b>12 months</b><br>- Number of PT sessions (CRF); Healthcare resource use (self-reported questionnaire) – PHC consultations (GPs and practice nurses), consultations with other healthcare professionals (NHS and private), hospital-based procedures (diagnostic tests, epidural injections, inpatient episodes) and prescribed medication; Healthcare costs - Out of pocket expenditures on treatments and/or aids (self-reported questionnaire) and QALYs estimates (EuroQol EQ-5D)                                                                                                  |                                                                                           |                                |                                                                                                                                                                                                                                                                                                                                                                                                                                                                                                                                                 |
|                                               | Foster et al. (2014)(3)     |                                                                                                                                                                                                                                                                         |                                                                 |                                    |                                                                                                                                                                                                                                                                                                                                                                                                                                                                                                                                                                                          | N=922 patients<br><br>- Phase 1 (usual care): n=368<br>- Phase 3 (stratified care): n=554 | Patient<br>(2 and 6 mo)        | <b>2 and 6 months</b><br>- <b>Primary outcome:</b> Disability (RMDQ) at 6 months; Back pain intensity (NRS); Catastrophizing [Coping Strategies Questionnaire – Catastrophizing subscale (CSQ-CAT)]; Pain self-efficacy [Pain Self-efficacy Questionnaire (PSEQ)]; Health-related quality of life (SF-12); Global change (single question)<br><br><b>6 months</b><br>- Fear-avoidance beliefs (TSK); Anxiety and depression (HADS); Pain self-efficacy (PSEQ); Risk group (STarT Back Screening Tool); Work loss (one question); Adverse events |
|                                               |                             |                                                                                                                                                                                                                                                                         |                                                                 |                                    |                                                                                                                                                                                                                                                                                                                                                                                                                                                                                                                                                                                          |                                                                                           | Organizational<br>(2 and 6 mo) | <b>Process of care (medical records and CRF)</b><br>- Numbers of referrals to PT or other services; Ordered diagnostic tests (radiographs, magnetic resonance Imaging and computed tomography scans, blood tests); Prescribed medications; Reconsultations with the physician; Sickness certifications; Risk-appropriate use of PT (CRF).<br><br><b>2 and 6 months</b><br>- Patient satisfaction (self-reported questionnaire)<br><br><b>6 months</b>                                                                                           |

|                                            |                               |                                                                                                                                                                                                                                                                                                                                                                            |                                                                                            |                                                  |                                                                                                                                                                                                                                                                                                                                                                                                                                                                                                                                                                                                                                                                                                                                                                                                                                    |
|--------------------------------------------|-------------------------------|----------------------------------------------------------------------------------------------------------------------------------------------------------------------------------------------------------------------------------------------------------------------------------------------------------------------------------------------------------------------------|--------------------------------------------------------------------------------------------|--------------------------------------------------|------------------------------------------------------------------------------------------------------------------------------------------------------------------------------------------------------------------------------------------------------------------------------------------------------------------------------------------------------------------------------------------------------------------------------------------------------------------------------------------------------------------------------------------------------------------------------------------------------------------------------------------------------------------------------------------------------------------------------------------------------------------------------------------------------------------------------------|
|                                            | Whitehurst et al. (2015)(4)   |                                                                                                                                                                                                                                                                                                                                                                            |                                                                                            |                                                  | - Healthcare resource use (self-reported questionnaire) – Inpatient stays, outpatient visits, other health care appointments including those in private practice and over-the-counter medications and treatments; Healthcare costs (QALYs estimates)                                                                                                                                                                                                                                                                                                                                                                                                                                                                                                                                                                               |
|                                            |                               |                                                                                                                                                                                                                                                                                                                                                                            |                                                                                            | Patient (2 and 6 mo)                             | <b>2 and 6 months</b><br>- Disability (RMDQ); Health-related quality of life (EQ-5D-3L)<br><b>6 Months</b><br>- Work-related – Employment status (self-reported questionnaire) and work loss (self-reported questionnaire)                                                                                                                                                                                                                                                                                                                                                                                                                                                                                                                                                                                                         |
|                                            |                               |                                                                                                                                                                                                                                                                                                                                                                            |                                                                                            | Organizational (2 and 6 mo)                      | <b>6 months</b><br>- Healthcare resource use (self-reported questionnaire) – PHC consultations (GPs and practice nurses), consultations with other healthcare professionals (NHS and private), hospital-based procedures (diagnostic tests, epidural injections, inpatient episodes), prescribed medication and out of pocket expenditure on treatments and/or aids; Cost-utility (QALYs estimates using the EQ-5D-3L).                                                                                                                                                                                                                                                                                                                                                                                                            |
|                                            | Murphy et al. (2016)(5)       | - Inclusion: ≥18 years old, LBP > 3 months, with or without leg symptoms.<br><br>- Exclusion: serious illness or spinal pathology, surgery, pregnancy.                                                                                                                                                                                                                     | N=583<br><br>- Intervention: n=251<br>- Control: n=332                                     | Patient (3 mo)                                   | <b>3 months</b><br>- <u>Primary outcome</u> : Disability (RMDQ); LBP intensity [Visual Analog Scale (VAS)]; Back beliefs [Back Beliefs Questionnaire (BBQ)]; Distress [Distress and Risk Assessment Method (DRAM)]; Depression (Modified Zung Depression Index); Anxiety [Modified Somatic Perception Questionnaire (MSPQ)]; Benefit (6-point self-rated scale).                                                                                                                                                                                                                                                                                                                                                                                                                                                                   |
|                                            | Morsø et al. (2021)(6)        | - Inclusion: ≥18 years, non-specific LBP of any duration, with or without leg pain, referred to PT by the GP.<br><br>- Exclusion: serious illness or spinal pathology, psychiatric illness, spinal surgery in the last 6 months, pregnancy, currently receiving PT.                                                                                                        | N=333<br><br>- Intervention: n=169<br>- Control: n=164                                     | Patient (3 and 12 mo)                            | <b>3 and 12 months</b><br>- <u>Primary outcome</u> : Disability (RMDQ); <u>Primary outcome</u> : Time off work (days/weeks) [patient self-report and Danish National Register of Public Transfer Payments (DREAM)]; <u>Primary outcome</u> : Patient reported global change (7-point Likert scale); Pain intensity (NRS); Well-being [World Health Organization Well-Being Index (WHO5)]                                                                                                                                                                                                                                                                                                                                                                                                                                           |
|                                            |                               |                                                                                                                                                                                                                                                                                                                                                                            |                                                                                            | Organizational (3 and 12 mo)                     | <b>3 and 12 months</b><br>- Satisfaction with improvement (single-item rating)<br><b>12 months</b><br>- Healthcare resource use (Danish Nationwide Patient Registry - DNPR) – Number of PT sessions, PHC consultations, secondary care (imaging and other contacts) and medication; Healthcare costs use (Danish Nationwide Patient Registry - DNPR) – PHC consultations, secondary care (imaging and other contacts), medication and total costs; QALYs estimates (EQ-5D-5L).                                                                                                                                                                                                                                                                                                                                                     |
| SCOPIC – Sciatica Outcomes in Primary Care | Konstantinou et al. (2020)(7) | - Inclusion: ≥18 years, with mobile phone or landline, consulted in GP with back and/or leg symptoms, with diagnosis of sciatica confirmed with at least 70% diagnostic confidence by a PT.<br><br>- Exclusion: serious spinal pathology or red flags, previous lumbar spine surgery, receiving ongoing care from or had been in consultation with a secondary care doctor | RCT: N=476<br><br>- Intervention: n=238<br>- Control: n=238<br><br>Qualitative study: N=40 | Patient (Weekly for the first 4 mo, 4 and 12 mo) | <b>Weekly for the first 4 months, 4 weeks between 4 and 12 months, or until “stable resolution” of symptoms</b><br>- <u>Primary outcome</u> : time to first resolution of sciatica symptoms (6-point ordinal scale)<br><b>4 and 12 months</b><br>- Global Perceived Change (6-point ordinal scale); Physical Function (Modified RMDQ); Impact of sciatica symptoms [Sciatica Bothersomeness Index (SBI)]; Back and leg pain intensity (NRS); Sleep disturbance [Jenkins Sleep Questionnaire (JSQ)]; Fear of movement (TSK); Anxiety and depression (HADS); Health-related quality of life (EQ-5D-5L); General health [Short-form 1 (SF1)]; Neuropathic pain symptoms [Self-report Leeds Assessment of Neuropathic Symptoms and Signs (S-LANSS)]; Work and productivity loss (self-reported questionnaire); Serious adverse events. |

|                                           |                           |                                                                                                                                                                                                                                                                                                                     |                                                                                                                                       |                                                                                    |                                                                                                                                                                                                                                                                                                                                                                                                                                                                                                                                                                                                                                                                                                                                                                                                                                                                                                                                                     |
|-------------------------------------------|---------------------------|---------------------------------------------------------------------------------------------------------------------------------------------------------------------------------------------------------------------------------------------------------------------------------------------------------------------|---------------------------------------------------------------------------------------------------------------------------------------|------------------------------------------------------------------------------------|-----------------------------------------------------------------------------------------------------------------------------------------------------------------------------------------------------------------------------------------------------------------------------------------------------------------------------------------------------------------------------------------------------------------------------------------------------------------------------------------------------------------------------------------------------------------------------------------------------------------------------------------------------------------------------------------------------------------------------------------------------------------------------------------------------------------------------------------------------------------------------------------------------------------------------------------------------|
|                                           |                           | or PT for the same problem in the previous 3 months, serious physical or mental comorbidities, pregnancy, taking part simultaneously in another study related to sciatica.                                                                                                                                          | <ul style="list-style-type: none"> <li>- 20 patients</li> <li>- 7 spinal PTs</li> <li>- 9 GPs</li> <li>- 4 spinal surgeons</li> </ul> | Organizational (4 and 12 mo)                                                       | <p><b>12 months</b></p> <ul style="list-style-type: none"> <li>- Healthcare resource use (self-reported questionnaire and medical records) – Number of PT sessions, duration of PT treatments, timing of referral and treatment, spinal injections and spinal surgery; Healthcare costs (self-reported questionnaire and medical records) – Total costs and QALYs estimates (EQ-5D-5L)</li> </ul>                                                                                                                                                                                                                                                                                                                                                                                                                                                                                                                                                   |
|                                           | Foster et al. (2020)(8)   |                                                                                                                                                                                                                                                                                                                     |                                                                                                                                       | Patient (Weekly for the first 4 mo, 4 and 12 mo)                                   | <p><b>Weekly for the first 4 months, 4 weeks between 4 and 12 months, or until “stable resolution” of symptoms</b></p> <ul style="list-style-type: none"> <li>- <u>Primary outcome</u>: time to first resolution of sciatica symptoms (6-point ordinal scale)</li> </ul> <p><b>4 and 12 months</b></p> <ul style="list-style-type: none"> <li>- Global Perceived Change (6-point ordinal scale); Physical Function (Modified RMDQ); Impact of sciatica symptoms (SBI); Back and leg pain intensity (NRS); Sleep disturbance (JSQ); Fear of movement (TSK); Anxiety and depression (HADS); Risk of poor outcome (SBST); Health-related quality of life (EQ-5D-5L); General health (SF1); Neuropathic pain symptoms (S-LANSS); Employment status (self-reported questionnaire); Work loss (self-reported questionnaire); Presenteeism/productivity [single question with NRS response (0–10 scale); Work Production Index]; Adverse events</li> </ul> |
|                                           |                           |                                                                                                                                                                                                                                                                                                                     |                                                                                                                                       | Organizational (4 and 12 mo)                                                       | <p><b>Process of care (CRFs)</b></p> <ul style="list-style-type: none"> <li>- Number of referrals to PT services; Number of PT sessions; Number of referrals to specialist spinal services and/or secondary care; Treatments provided; Timing of referral and treatment</li> </ul> <p><b>4 and 12 months</b></p> <ul style="list-style-type: none"> <li>- Patient satisfaction (5-point scale)</li> </ul> <p><b>12 months</b></p> <ul style="list-style-type: none"> <li>- Healthcare resource use (self-reported questionnaire and medical records) – PHC consultations (GPs, nurses and PTs), secondary care consultations, prescriptions, hospital-based tests and procedures, spinal injections and spinal surgery, nature and length of inpatient stays; Healthcare costs (self-reported questionnaire and medical records) – Over-the-counter purchases, out-of-pocket expenses, total costs and QALYs estimates (EQ-5D-5L).</li> </ul>       |
|                                           | Saunders et al. (2020)(9) | - Inclusion: Patients on the ‘fast-track’ pathway in the stratified care arm of the SCOPiC trial and clinicians                                                                                                                                                                                                     |                                                                                                                                       | Implementation (4 mo after the follow-up of the RCT and at the end of recruitment) | <p><b>4 months after the follow up of the RCT (patients, PTs and surgeons) and at the end of RCT recruitment (GPs)</b></p> <ul style="list-style-type: none"> <li>- Acceptability of the ‘fast-track’ pathway for patients with severe sciatica symptoms (interviews)</li> </ul>                                                                                                                                                                                                                                                                                                                                                                                                                                                                                                                                                                                                                                                                    |
| MATCH – Matching Appropriate Treatment to | Cherkin et al. (2018)(10) | <ul style="list-style-type: none"> <li>- Inclusion: Adults receiving primary care, ≥ 18 years, identified in the EHR with a primary diagnosis of non-specific LBP</li> <li>- Exclusion: Specific causes of pain (e.g., pregnancy, disc herniation, vertebral fracture, spinal stenosis) or job injuries.</li> </ul> | <p>N=1901</p> <ul style="list-style-type: none"> <li>- Intervention: n=756</li> <li>- Control: n=945</li> </ul>                       | Patient (2 and 6 mo)                                                               | <p><b>2 and 6 months</b></p> <ul style="list-style-type: none"> <li>- <u>Primary outcome</u>: Physical function (modified RMDQ); <u>Primary outcome</u>: LBP severity in previous week (NRS); Anxiety [Generalized Anxiety Disorder (GAD-7)]; Depression [Patient Health Questionnaire (PHQ-9)]; Self-efficacy (PSEQ); Fear of movement (TSK); Work loss and productivity [2 items of the Work Productivity and Activity Impairment (WPAI)]; Global improvement [Patient Global Impression of Change (PGIC)]</li> </ul>                                                                                                                                                                                                                                                                                                                                                                                                                             |
|                                           |                           |                                                                                                                                                                                                                                                                                                                     |                                                                                                                                       | Organizational (2 and 6 mo)                                                        | <p><b>2 and 6 months</b></p> <ul style="list-style-type: none"> <li>- Patient satisfaction (10-item instrument)</li> </ul> <p><b>6 months</b></p>                                                                                                                                                                                                                                                                                                                                                                                                                                                                                                                                                                                                                                                                                                                                                                                                   |

|                                                                                               |                             |                                                                                                                                                                                                         |                                                                                                        |                                         |                                                                                                                                                                                                                                                                                                                                                                                                                                                                                                   |
|-----------------------------------------------------------------------------------------------|-----------------------------|---------------------------------------------------------------------------------------------------------------------------------------------------------------------------------------------------------|--------------------------------------------------------------------------------------------------------|-----------------------------------------|---------------------------------------------------------------------------------------------------------------------------------------------------------------------------------------------------------------------------------------------------------------------------------------------------------------------------------------------------------------------------------------------------------------------------------------------------------------------------------------------------|
|                                                                                               |                             |                                                                                                                                                                                                         |                                                                                                        |                                         | - Healthcare resource use (EHR) – Lumbar spine imaging, additional PHC visits, emergency department visits, narcotic analgesics, PT visits, CAM visits, behavioural health visits, spine surgeon visits, injections of lumbar spine and back-related hospitalizations.                                                                                                                                                                                                                            |
|                                                                                               | Hsu et al. (2019)(11)       | - Inclusion: PTs and PCPs (medical doctors, osteopathic doctors, nurses, physician assistants)                                                                                                          | - Questionnaire: N=402<br>- Interviews: N=22 (PTs and PCPs)                                            | Implementation (post-training)          | <b>Post-training</b><br>- Attendance at training sessions (not reported); Perspectives and experiences regarding implementation strategies and experiences using the stratified care model (Ethnography and interviews with PHC team members and PTs)                                                                                                                                                                                                                                             |
| <b>TARGET – Targeted Interventions to Prevent Chronic Low Back Pain in High-Risk Patients</b> | Beneciuk et al. (2019)(12)  | - Inclusion: Outpatient PTs                                                                                                                                                                             | N=471                                                                                                  | Implementation (post-training and 4 mo) | <b>Post-training and 4 months</b><br>- PTs’ attitudes and beliefs about biomedical and biopsychosocial treatment orientations [Pain Attitudes and Beliefs Scale for Physical Therapists (PABS-PT)]<br><b>Post-training</b><br>- PTs’ confidence in implementing PIPT (11-point Likert scale)                                                                                                                                                                                                      |
|                                                                                               | Middleton et al. (2020)(13) | - Inclusion: Adult primary care patients with evidence of acute LBP management in the EHR.                                                                                                              | - Quantitative study: N=23,913 (9030 patients stratified by risk)<br>- Qualitative study: N=13 clinics | Organizational (24 mo)                  | <b>24 months</b> (EHR)<br>- Risk stratification rates; Rates of referral of acute high-risk patients; Relationship between risk stratification and referral rates within clinics                                                                                                                                                                                                                                                                                                                  |
|                                                                                               | Delitto et al. (2021)(14)   | - Inclusion: ≥18 years with a primary complaint of LBP.<br><br>- Exclusion: Chronic symptoms based on a 2-item LBP Questionnaire derived from the NIH Chronic LBP task force; serious spinal pathology. | N=2300                                                                                                 | Patient (6 mo)                          | <b>6 months</b><br>- <u>Primary outcome</u> : transition to chronic LBP [2-item questionnaire adapted from the NIH Task Force];<br><u>Primary outcome</u> : back-related disability [Oswestry Disability Index (ODI)]                                                                                                                                                                                                                                                                             |
|                                                                                               |                             |                                                                                                                                                                                                         |                                                                                                        | Organizational (12 mo)                  | <b>12 months</b><br>- Process of care (EHR) – Referral to PT or PIPT, referral to medical specialists, diagnostic imaging and orders for opioid prescriptions and other LBP-related pain medications; Healthcare resource use (EHR) – Outpatient visits (PHC and specialists), receipt of diagnostic imaging, interventional pain procedures (e.g., epidural injections), electrodiagnostic tests (e.g., nerve conduction velocity), surgeries, hospitalizations and emergency department visits. |
| <b>BETTERBACK®</b>                                                                            | Schröder et al. (2020)(15)  | - Inclusion: PTs working with LBP patients who attended the BetterBack® workshop                                                                                                                        | N=116                                                                                                  | Implementation (after, 3 and 12 mo)     | <b>After, 3 and 12 months</b><br>- <u>Primary outcome</u> : Self-confidence in managing LBP patients [Practitioner Self-Confidence Scale (PCS)]; Determinants of PT’s behaviour [Determinants of Implementation Behaviour Questionnaire (DIBQ)].<br><b>3 and 12 months</b><br>- PTs’ attitudes and beliefs about biomedical and biopsychosocial treatment orientations (PABS-PT).                                                                                                                 |
|                                                                                               | Enthoven et al. (2021)(16)  | - Inclusion: Participants previously treated according to the BetterBack MoC for a first-time or recurrent episode of benign LBP with or without radiculopathy.                                         | N=15                                                                                                   | Implementation (4-14 mo)                | <b>4-14 months</b><br>- Patients’ experiences of receiving care according to the MoC (interviews)                                                                                                                                                                                                                                                                                                                                                                                                 |
|                                                                                               | Schröder et al. (2021)(17)  | Patients:<br>- Inclusion: 18–65 years, accessing public primary care due to a first-time or recurrent episode of acute, subacute, or chronic-phase benign LBP, with or without                          | N=467<br><br>- Intervention: n=264                                                                     | Patient (3, 6 and 12 mo)                | <b>3, 6 and 12 months</b><br>- <u>Primary outcome</u> : Pain intensity (NRS-LBP); <u>Primary outcome</u> : Function and activity limitations (ODI); Risk stratification (SBST); Health-related quality of life (EQ-5D); Cognitive and emotional representations of illness [Brief Illness Perception Questionnaire (BIPQ)]; Ability to understand and cope with LBP [Pain Enablement Instrument (PEI)]; Perceived change (PGIC)                                                                   |

|                                     |                            |                                                                                                                                                                                                                                                                                                                                                                                          |                                                                                                                                                                                                                                         |                                    |                                                                                                                                                                                                                                                                                                                                                                                                                                                                                                                                                                                                                                                                                                               |
|-------------------------------------|----------------------------|------------------------------------------------------------------------------------------------------------------------------------------------------------------------------------------------------------------------------------------------------------------------------------------------------------------------------------------------------------------------------------------|-----------------------------------------------------------------------------------------------------------------------------------------------------------------------------------------------------------------------------------------|------------------------------------|---------------------------------------------------------------------------------------------------------------------------------------------------------------------------------------------------------------------------------------------------------------------------------------------------------------------------------------------------------------------------------------------------------------------------------------------------------------------------------------------------------------------------------------------------------------------------------------------------------------------------------------------------------------------------------------------------------------|
|                                     |                            | radiculopathy.<br><br>- Exclusion: current or previous malignancy in the last 5 years, serious spinal pathology, spinal surgery the last 2 years, current or previous pregnancy in the last 3 months, participants who fulfil the criteria for multimodal/multiprofessional rehabilitation for complex long-standing pain and severe psychiatric diagnosis.                              | - Control: n=203<br><br>PTs: N=104                                                                                                                                                                                                      | Organizational<br>(3, 6 and 12 mo) | <b>Process of care</b><br>- Clinical Practice Quality Index – Guideline adherence [(Clinical Reasoning and Process Evaluation tool - CRPE)], number of PT treatments [(Public Healthcare Regional Registry - PHRR)], referral to specialist consultation (PHRR) and medical imaging (PHRR)<br><b>3, 6 and 12 months</b><br>- Patient satisfaction [Patient Satisfaction (PS)]                                                                                                                                                                                                                                                                                                                                 |
|                                     | Schröder et al. (2022)(18) | PTs:<br><br>- Inclusion: PTs who worked regularly with patients with LBP.                                                                                                                                                                                                                                                                                                                | Register cohort<br>- PTs: N=105<br>- LBP patients: N=500 (intervention n=278; control n=222)<br><br>CRPE- smaller cohort:<br>- PTs: N=98 (intervention n=44; control n=54)<br>- LBP patients: N=388 (intervention n=223; control n=165) | Organizational                     | <b>Process of care</b><br>- Adherence to clinical practice guidelines recommendations - Clinical Practice Quality Index (PHRR and CRPE):<br>• <b>Primary outcome:</b> Proportion of patients receiving referral to specialist consultation (PHRR), Proportion of patients receiving medical imaging (PHRR), Proportion of patients receiving stratified number of PT visits (PHRR), Proportion of patients receiving educational interventions (CRPE), Proportion of patients receiving exercise interventions (CRPE), Proportion of patients receiving manual therapy (CRPE), Proportion of patients receiving acupuncture (CRPE) and Proportion of patients receiving non-evidence-based treatments (CRPE). |
| Low Back and Radicular Pain Pathway | Greenough (2017)(19)       | - Inclusion: Patients with LBP with or without leg pain.                                                                                                                                                                                                                                                                                                                                 | Not reported                                                                                                                                                                                                                            | Patient (discharge)                | <b>Discharge</b><br>- Pain intensity (NRS); Disability (ODI); Health-related quality of life (EQ-5D); Anxiety (GAD-7); Depression (PHQ-9); Readiness to self-manage (0–10-point scale).                                                                                                                                                                                                                                                                                                                                                                                                                                                                                                                       |
|                                     |                            |                                                                                                                                                                                                                                                                                                                                                                                          |                                                                                                                                                                                                                                         | Organizational (discharge)         | <b>Process of care</b><br>- Percentage of discharges from treatments (pathway database)<br><b>Discharge</b><br>- Patient satisfaction [Friends and Family Test (FFT)]                                                                                                                                                                                                                                                                                                                                                                                                                                                                                                                                         |
|                                     | Ryan et al. (2020)(20)     | - Inclusion: ≥18 years, with sciatica, who were under the care of a specialist PT, undergone investigations and received the results within the previous 6 weeks.<br><br>- Exclusion criteria: previous spinal surgery, cauda equina syndrome or sinister pathology, patients unable to communicate or provide consent; or the researcher had treated them in a previous episode of LBP. | N=14                                                                                                                                                                                                                                    | Implementation (6 weeks)           | <b>6 weeks</b><br>- Patients’ experiences within the NHS pathway (interviews)                                                                                                                                                                                                                                                                                                                                                                                                                                                                                                                                                                                                                                 |
|                                     | Martin et al. (2018)(21)   | - Quantitative study: All patients attending during the evaluation period. No exclusion criteria.<br><br>- Qualitative study: People engaged in the development, implementation, delivery, or patient of the NERBPP (key decision makers, triage and treat practitioners, healthcare professionals, GPs, patients)                                                                       | - Quantitative study: N=3834<br><br>- Qualitative study: N=35                                                                                                                                                                           | Patient (Discharge, 6 and 12 mo)   | <b>Discharge, 6 and 12 months</b><br>- Pain intensity (NRS); Function (ODI); Health status/quality of life (EQ-5D-5L); Anxiety (GAD-7); Depression (PHQ-9)<br><b>Discharge</b><br>- Global Subjective Outcome Scale (GSOS); Readiness to self-manage (0–10-point scale)                                                                                                                                                                                                                                                                                                                                                                                                                                       |
|                                     |                            |                                                                                                                                                                                                                                                                                                                                                                                          |                                                                                                                                                                                                                                         | Organizational (6 weeks)           | <b>Discharge</b><br>- Patient satisfaction (FFT)                                                                                                                                                                                                                                                                                                                                                                                                                                                                                                                                                                                                                                                              |
|                                     |                            |                                                                                                                                                                                                                                                                                                                                                                                          |                                                                                                                                                                                                                                         | Implementation                     | <b>Before, during and after implementation</b>                                                                                                                                                                                                                                                                                                                                                                                                                                                                                                                                                                                                                                                                |

|                                   |                                 |                                                                                                                                                                                                                                                                   |                                                                                                 |                                   |                                                                                                                                                                                                                                                                                                                               |
|-----------------------------------|---------------------------------|-------------------------------------------------------------------------------------------------------------------------------------------------------------------------------------------------------------------------------------------------------------------|-------------------------------------------------------------------------------------------------|-----------------------------------|-------------------------------------------------------------------------------------------------------------------------------------------------------------------------------------------------------------------------------------------------------------------------------------------------------------------------------|
|                                   |                                 |                                                                                                                                                                                                                                                                   |                                                                                                 |                                   | - Opinions of clinicians, commissioners and patients regarding the implementation of the pathway (interviews and focus groups)                                                                                                                                                                                                |
|                                   | Jess et al. (2018)(22)          | - Inclusion: ≥18 years, patients referred onto the NERBPP by their GP due to acute, new onset, LBP episode or a flare-up of LBP with at least 6 months since their last attack.                                                                                   | N=3834<br>- Standard discharge: n=2071<br>- Same-day discharge: n=1147<br>- Non-Attender: n=616 | Patient (discharge)               | <b>Discharge</b><br>- Pain intensity (NRS); Functional disability (ODI); Health-related quality of life (EQ-5D-5L); Anxiety (GAD-7); Depression (Patient Health Questionnaire -PHQ-9); Perception of improvement (GSOS); Readiness to self-manage (0–10-point scale).                                                         |
|                                   | Jess et al. (2021)(23)          |                                                                                                                                                                                                                                                                   | - 6-month follow-up: N=786<br>- 6-month follow-up: N=552                                        | Organizational (discharge)        | <b>Discharge</b><br>- Patient satisfaction (FFT)                                                                                                                                                                                                                                                                              |
|                                   |                                 |                                                                                                                                                                                                                                                                   |                                                                                                 | Patient (6 and 12 mo)             | <b>6 and 12 months</b><br>- Pain intensity (NRS); Functional disability (ODI); Health-related quality of life (EQ-5D-5L); Anxiety (GAD-7); Depression (Patient Health Questionnaire -PHQ-9); Perception of improvement (GSOS)                                                                                                 |
|                                   |                                 |                                                                                                                                                                                                                                                                   |                                                                                                 | Organizational (6 and 12 mo)      | <b>6 and 12 months</b><br>- Patient satisfaction (FFT)                                                                                                                                                                                                                                                                        |
| <b>Beating Back Pain Service</b>  | Cheshire et al. (2013)(24)      | - Inclusion criteria: non-specific LBP, >6 weeks duration, ≥18 years.<br><br>- Exclusion: presence of red flags, inability to communicate in English, mental health problems and substance abuse.                                                                 | N=80                                                                                            | Patient (discharge and 3 mo)      | <b>Discharge and 3 months</b><br>- Musculoskeletal pain [Bournemouth Questionnaire (BQ)]; Health-related quality of life (EQ-5D); Self-efficacy (PSEQ); Positive well-being [5 questions on a 0–10-point scale]; Physical activity levels (0–10-point scale); Analgesic use (single question); Work status (single question). |
|                                   |                                 |                                                                                                                                                                                                                                                                   |                                                                                                 | Implementation (post-treatment)   | <b>Post-treatment</b><br>- Benefits, improvements, comments or suggestions regarding the service [open-ended questions at the end of the self-reported questionnaire]                                                                                                                                                         |
| <b>NE Essex PCT service</b>       | Gurden et al. (2012)(25)        | - Inclusion: Adults, consulting GP for at least 4 weeks for back or neck pain, suitable for manual therapy.<br><br>- Exclusion: serious pathology or red flags and serious comorbidity.                                                                           | N=696                                                                                           | Patient (discharge)               | <b>Discharge</b><br>- Back and neck pain (BQ); Impact of symptoms (Bothersomeness Questionnaire); Global improvement scale (7-point scale); Work status (self-reported questionnaire); Medication use (self-reported questionnaire)                                                                                           |
|                                   |                                 |                                                                                                                                                                                                                                                                   |                                                                                                 | Organizational (discharge)        | <b>Discharge</b><br>- Patient satisfaction (5-point scale); Healthcare resource use (self-reported questionnaire) – Number of treatments, referrals to secondary care, referrals to GP/other health professionals and discharges.                                                                                             |
| <b>ISAEC</b>                      | Zarrabian et al. (2017)(26)     | - Inclusion: Potential surgical candidates with unmanageable, persistent LBP for more than 6 weeks but less than 52 weeks or recurrent LBP.<br><br>- Exclusion criteria: pain disorder, narcotic dependency, pregnancy or postpartum less than a year, red flags. | N=422                                                                                           | Patient (after assessment)        | <b>At the initial assessment and after the surgeons' assessment</b><br>- Presenting pain pattern (medical records)                                                                                                                                                                                                            |
|                                   |                                 |                                                                                                                                                                                                                                                                   |                                                                                                 | Organizational (after assessment) | <b>At the initial assessment and after the surgeons' assessment</b><br>- Number and type of imaging (medical records); Referral appropriateness for surgery (medical records); Wait time from PCP referral to assessment at ISAEC (medical records).                                                                          |
| <b>Saskatchewan Spine Pathway</b> | Kindrachuk & Fournay (2014)(27) | - Inclusion: Nonemergency referrals of LBP and leg pain.<br><br>- Exclusion: option of refusing the SSP visit.                                                                                                                                                    | N=87<br><br>- Group A: n=62<br>- Group B: n=25                                                  | Patient (7 mo)                    | <b>7 months (May 2011 – November 2011)</b><br>- Disability (ODI); Back and leg pain (VAS); Health-related quality of life (EQ-5D); Presence of clinical “red flags” (not reported); SSP clinical classification (not reported).                                                                                               |
|                                   |                                 |                                                                                                                                                                                                                                                                   |                                                                                                 | Organizational (7 mo)             | <b>7 months (May 2011 – November 2011)</b><br>- Surgery rate (not reported); MRI utilization (not reported).                                                                                                                                                                                                                  |
|                                   |                                 |                                                                                                                                                                                                                                                                   |                                                                                                 | Patient                           | <b>1 year (June 2011 – May 2012)</b>                                                                                                                                                                                                                                                                                          |
|                                   |                                 |                                                                                                                                                                                                                                                                   | N= 215                                                                                          |                                   |                                                                                                                                                                                                                                                                                                                               |

|                             |                       |                                                                                                                                                                                                                                                                                                                                                                                                                                                                                                                                                                                                                                                                                    |                                                                                                                                                                      |                                              |                                                                                                                                                                                                                                                                                                                                                                                                                                                                                                                                                                                                                   |
|-----------------------------|-----------------------|------------------------------------------------------------------------------------------------------------------------------------------------------------------------------------------------------------------------------------------------------------------------------------------------------------------------------------------------------------------------------------------------------------------------------------------------------------------------------------------------------------------------------------------------------------------------------------------------------------------------------------------------------------------------------------|----------------------------------------------------------------------------------------------------------------------------------------------------------------------|----------------------------------------------|-------------------------------------------------------------------------------------------------------------------------------------------------------------------------------------------------------------------------------------------------------------------------------------------------------------------------------------------------------------------------------------------------------------------------------------------------------------------------------------------------------------------------------------------------------------------------------------------------------------------|
|                             | gen bus ch            | <ul style="list-style-type: none"> <li>- Inclusion; New elective outpatient surgeon referrals for LBP and leg pain seen by 2 neurosurgeons.</li> <li>- Exclusion: red flags.</li> </ul>                                                                                                                                                                                                                                                                                                                                                                                                                                                                                            | <ul style="list-style-type: none"> <li>- Group A: n=66</li> <li>- Group B: n=149</li> </ul>                                                                          | <p>(12 mo)</p> <p>Organizational (12 mo)</p> | <ul style="list-style-type: none"> <li>- Disability (ODI); Back and leg pain (VAS); Number of patients with SSPc patterns; Health-related quality of life (EQ-5D-5L).</li> </ul> <p><b>1 year (June 2011 – May 2012)</b></p> <ul style="list-style-type: none"> <li>- Number of referrals to surgery; Wait time for surgeon assessment; Wait time for MRI.</li> </ul>                                                                                                                                                                                                                                             |
| Back pain Assessment Clinic | Moi et al. (2018)(29) | <ul style="list-style-type: none"> <li>- <b>Inclusion:</b> ≥18 years, referrals for neck or LBP, with or without limb symptoms, already on outpatient spinal surgical waiting lists, triaged as ‘non-urgent’ or assigned a ‘next available’ appointment by neurosurgery and orthopaedic spinal units. Low likelihood of surgical intervention.</li> <li>- <b>Exclusion:</b> red flags, spinal surgery within the last 2 years, radiculopathy accompanied by limb weakness, moderate-to-severe scoliosis, peripheral entrapment neuropathies, high likelihood of need for surgical intervention, comorbidities, referred for medicolegal opinions or compensable claims.</li> </ul> | <p>N=522</p> <ul style="list-style-type: none"> <li>- Qualitative study: N=94 (Patients n=54; Health professionals and managers n=14; and referrers n=26)</li> </ul> | Patient (12 weeks)                           | <p><b>After a 12-week rehabilitation programme</b></p> <ul style="list-style-type: none"> <li>- Pain [Brief Pain Inventory (BPI) short form]; Disability [(ODI) or Neck Disability Index (NDI)]; Overall well-being [Global Improvement Scale].</li> </ul>                                                                                                                                                                                                                                                                                                                                                        |
|                             |                       |                                                                                                                                                                                                                                                                                                                                                                                                                                                                                                                                                                                                                                                                                    |                                                                                                                                                                      | Organizational (12 weeks)                    | <p><b>After a 12-week rehabilitation programme</b></p> <ul style="list-style-type: none"> <li>- Patient satisfaction (survey); Waiting times (survey) - time from referral to initial consultation, patients redirected from neurosurgery waiting lists, patients redirected from orthopaedic waiting lists; Appropriate and safe care (survey) – medication adjustments, spinal injections, MRI utilization, referrals to community-based spinal rehabilitation, referrals to specialist services, discharges, GP satisfaction; Efficiency and sustainability (survey) – Costs/patient, cost-savings.</li> </ul> |
|                             |                       |                                                                                                                                                                                                                                                                                                                                                                                                                                                                                                                                                                                                                                                                                    |                                                                                                                                                                      | Implementation (12 mo)                       | <p><b>1 year (July 2014 – June 2015)</b></p> <ul style="list-style-type: none"> <li>- Victorian Innovation Reform Impact Assessment Framework domains (BAC activity audit, patient surveys and stakeholders’ interviews) – Access to care, Appropriate and safe care, Workforce optimization and integration and Efficiency and sustainability.</li> </ul>                                                                                                                                                                                                                                                        |

**Abbreviations:**

BAC – Back pain Assessment Clinic; CAM - Complementary and Alternative Medicine; CRPE - Clinical Reasoning and Process Evaluation; EHR – Electronic Health Record; GP – General Practitioner; ISAEC – Inter-professional Spine Assessment and Education Clinics; LBP – Low Back Pain; MoC – Model of Care; MRI – Magnetic Resonance Imaging; NERBPP – North East Low Back and Radicular Pain Pathway; NHS – National Health System; PCP – Primary Care Provider; PHC – Primary Healthcare; PHRR - Public Healthcare Regional Registry; PIPT - Psychologically Informed Physical Therapy; PT – Physiotherapy; PTs – Physiotherapists; QALYs – quality-adjusted life years; RCT – Randomized controlled trial; SBST – Start Back Screening Tool; SSP – Saskatchewan Spine Pathway;



## Additional File 5 – Core components of the MoCs

| MoC        | Study                   | Referral                                                                                           | Assessment                                                                     | Health Interventions                                                                                                                                                                                                                                                                                                                                                                                                       | Follow-up                                                                                                  | Discharge                                                                                                                                         |
|------------|-------------------------|----------------------------------------------------------------------------------------------------|--------------------------------------------------------------------------------|----------------------------------------------------------------------------------------------------------------------------------------------------------------------------------------------------------------------------------------------------------------------------------------------------------------------------------------------------------------------------------------------------------------------------|------------------------------------------------------------------------------------------------------------|---------------------------------------------------------------------------------------------------------------------------------------------------|
| START BACK | (1,2)<br>STarT<br>Back  | GP, practice nurse or the local Physiotherapy Direct Access service (Physio Direct) referral to PT | PT assessment and risk stratification (SBST)                                   | PTs deliver risk-matched group care:<br>- All risk groups: Education + booklet <i>The Back Book</i> + video "Get Back Active";<br>- Low risk: Single session (30 minutes) of minimal intervention (education + advice + reassurance);<br>- Medium risk: 30-minute session of education + standardized PT (exercise + manual therapy);<br>- High risk: Education + PIPT (CBT with traditional PT)                           | - Patients are advised to access their GP for ongoing care in the usual way or if their condition worsens. | - Low risk: after the initial education session;<br>- Medium risk: after a maximum of 6 sessions;<br>- High risk: after a maximum of 12 sessions. |
|            | (3,4)<br>IMPACT<br>Back | GPs referral to PT                                                                                 | GP risk stratification (SBST) + PT assessment of medium and high-risk patients | GPs deliver care to:<br>- Low risk: Single session of minimal intervention (education + reassurance + information on self-management). Pain medication if appropriate;<br>PTs deliver risk-matched group care:<br>- Medium risk: education + standardized PT (exercise + manual therapy);<br>- High risk: education + PIPT (CBT with traditional PT)                                                                       | - If needed, medium and high-risk patients referred for further investigations or secondary care.          | - Low risk: after the initial education session;<br>- Medium risk: after a maximum of 6 sessions;<br>- High risk: after a maximum of 12 sessions. |
|            | (5)<br>Ireland          | GP or PT team refer to the Back Pain Clinic                                                        | PT assessment and risk stratification (SBST)                                   | PTs deliver risk-matched group care:<br>- Low risk: 1.5-hour small group session of education + exercise to promote active self-management;<br>- Medium risk: Four 90-minute group sessions (8-10 patients) of education + generic exercise over 4 weeks;<br>- High risk: Four 120-minute group sessions (4-6 patients) of exercise (as medium risk group) + problem solving approach + CBT to promote self-management     | Not reported                                                                                               | - Low risk: after the initial education session;<br>- Medium risk: after 12 weeks;<br>- High risk: after 12 weeks.                                |
|            | (6)<br>Denmark          | GPs referral to PT                                                                                 | GPs assessment + PT assessment and risk stratification (SBST)                  | PTs deliver risk-matched group care:<br>- All risk groups: Education (education + advice + reassurance + booklet similar to <i>The Back Book</i> )<br>- Low-risk: minimal intervention (education + advice + reassurance)<br>- Medium risk: individualized PT treatment + intervention focusing prevention of new LBP episodes<br>- High risk: individualized PIPT (CBT and/or behavioural techniques with traditional PT) | Not reported                                                                                               | Not reported                                                                                                                                      |

|                    |                  |                                                                                                                                                                  |                                                                                                                        |                                                                                                                                                                                                                                                                                                                                                                                                                                                                                                                                                                                                                                                                                           |                                                                                                                                                                                                                                                                                                                                                                     |                                                                                                                                                                                                                |
|--------------------|------------------|------------------------------------------------------------------------------------------------------------------------------------------------------------------|------------------------------------------------------------------------------------------------------------------------|-------------------------------------------------------------------------------------------------------------------------------------------------------------------------------------------------------------------------------------------------------------------------------------------------------------------------------------------------------------------------------------------------------------------------------------------------------------------------------------------------------------------------------------------------------------------------------------------------------------------------------------------------------------------------------------------|---------------------------------------------------------------------------------------------------------------------------------------------------------------------------------------------------------------------------------------------------------------------------------------------------------------------------------------------------------------------|----------------------------------------------------------------------------------------------------------------------------------------------------------------------------------------------------------------|
| SCOPIC             | (7-9)            | GP or other HCP refer to the SCOPiC sciatica clinic                                                                                                              | PT assessment and risk stratification (SBST)                                                                           | <p>PTs deliver risk-matched group care:</p> <ul style="list-style-type: none"> <li>- Subgroup 1 (low risk): 30-minute sessions (advice + education + self-management support + sciatica booklet)</li> <li>- Subgroup 2 (medium risk with score <math>\leq 3</math> or high risk with score <math>\leq 2</math>): one 45-minute session + 30-minute sessions of individualised treatment (advice + reassurance + education + exercise + manual therapy + acupuncture + sciatica booklet)</li> <li>- Subgroup 3 (medium risk with score =4 or high risk with score <math>\geq 3</math>): Referral to a fast-track care pathway at the primary/secondary care interface services.</li> </ul> | <ul style="list-style-type: none"> <li>- Subgroups 1 and 2: Patients are able to access other care via their GP.</li> <li>- Subgroup 3: specialist spinal PT assessment + referral to imaging (MRI or alternative) + referral to specialist clinics services (orthopaedics, neurosurgery or pain clinic).</li> </ul>                                                | <ul style="list-style-type: none"> <li>- Subgroup 1: after up to 2 sessions within 4 weeks;</li> <li>- Medium risk: after up to 6 sessions within 6 to 12 weeks;</li> <li>- High risk: not reported</li> </ul> |
| MATCH              | (10,11)          | <p>PCPs referral:</p> <ul style="list-style-type: none"> <li>- Medium risk patients to PT or CAM</li> <li>- High-risk patients to psychologist and PT</li> </ul> | PCP assessment and risk stratification (SBST)                                                                          | <p>PCPs deliver care to:</p> <ul style="list-style-type: none"> <li>- Low risk: Reassurance + self-management recommendations + online DVDs</li> </ul> <p>PTs or CAM professionals deliver care to:</p> <ul style="list-style-type: none"> <li>- Moderate risk: Self-management recommendations + PT-led exercise and yoga. For patients not interested these treatments, refer to passive options (acupuncture, chiropractic or massage)</li> </ul> <p>PTs and psychologists:</p> <ul style="list-style-type: none"> <li>- High risk: PIPT and CBT (access to CBT is very limited)</li> </ul>                                                                                            | <p>Low and medium risk patients: Not reported</p> <p>High-risk patients: Proactive follow-up within 2 weeks by PCPs</p>                                                                                                                                                                                                                                             | Not reported                                                                                                                                                                                                   |
| TARGET             | (12-14)          | PCPs referral to PIPT                                                                                                                                            | PCP assessment and risk stratification (2-item Chronic Low Back Pain Questionnaire + SBST for patients in acute stage) | <ul style="list-style-type: none"> <li>- PCPs deliver education and pain medication to high-risk patients</li> <li>- PTs deliver PIPT (cognitive behavioural training, motivational interviewing, pain-coping skills and activity-based treatments that include graded activity and graded exposure)</li> </ul>                                                                                                                                                                                                                                                                                                                                                                           | Not reported.                                                                                                                                                                                                                                                                                                                                                       | <p>Not reported.</p> <p>There are no limits placed on the duration of any therapies or treatments.</p>                                                                                                         |
| BETTERBACK®        | (15-18)          | <ul style="list-style-type: none"> <li>- Self-referral to the PHC PT rehabilitation clinics</li> <li>- Referral from the PHC general practices</li> </ul>        | PT assessment and risk stratification (SBST)                                                                           | <p>PTs deliver treatment matched to functional impairments based on SBST results (BetterBack part 1):</p> <ul style="list-style-type: none"> <li>- Individualised information + neuromusculoskeletal mobilisation techniques if indicated + exercise + patient education (brochure): <ul style="list-style-type: none"> <li>- Low-risk: 1-3 sessions</li> <li>- Medium-risk: <math>\geq 4</math> sessions</li> <li>- High-risk: <math>\geq 4</math> sessions with additional training + education with a behavioural approach.</li> </ul> </li> </ul>                                                                                                                                     | <p>PT assessment and evaluation of treatment outcomes – if needed PT group based-care (BetterBack part 2):</p> <ul style="list-style-type: none"> <li>- Group-based education: One 90-minute session (2-10 patients)</li> <li>- Group training (6 weeks, 2x/week): graded training of posture, motor control and, if needed, range of movement exercises</li> </ul> | Not reported                                                                                                                                                                                                   |
| Low Back and Radic | (19,20) National | GP, self-referral to a chiropractor, osteopath or PT and 111 telephone service                                                                                   | GP, chiropractor, osteopath or PT assessment and risk stratification (SBST)                                            | <p>GP, chiropractor, osteopath or PT initial management:</p> <ul style="list-style-type: none"> <li>- Advice + information + pain medication + PT core therapies (education + manual therapy + exercise) with a 2-week review.</li> </ul>                                                                                                                                                                                                                                                                                                                                                                                                                                                 | - If imaging concordant with structural cause of sciatica, referral to epidural injection or surgery (after 8-12 weeks)                                                                                                                                                                                                                                             | Patients can be discharged at any point along the pathway upon improvement of the LBP.                                                                                                                         |

|                              |                          |                                                 |                                                                                  |                                                                                                                                                                                                                                                                                                                                                                                                                                                                                                                                                                                                                                                                                                 |                                                                                                                                                                                                                                                                                                      |                                                                                                                                                                                    |
|------------------------------|--------------------------|-------------------------------------------------|----------------------------------------------------------------------------------|-------------------------------------------------------------------------------------------------------------------------------------------------------------------------------------------------------------------------------------------------------------------------------------------------------------------------------------------------------------------------------------------------------------------------------------------------------------------------------------------------------------------------------------------------------------------------------------------------------------------------------------------------------------------------------------------------|------------------------------------------------------------------------------------------------------------------------------------------------------------------------------------------------------------------------------------------------------------------------------------------------------|------------------------------------------------------------------------------------------------------------------------------------------------------------------------------------|
| ular<br>Pain<br>Path<br>way  |                          |                                                 |                                                                                  | <ul style="list-style-type: none"> <li>- If no improvement, referral to TTP assessment + referral to imaging (if indicated) within 6 weeks.</li> </ul>                                                                                                                                                                                                                                                                                                                                                                                                                                                                                                                                          | <ul style="list-style-type: none"> <li>- If non-concordant structural cause, referral to CPPP (12-18 weeks)</li> <li>- If no improvement, referral to Specialist Pain Management Services (18 weeks) - Pain management programmes (physical, psychological and behavioural interventions)</li> </ul> |                                                                                                                                                                                    |
|                              | (21)<br>North            | GP referral or other first contact professional | GP or other first contact professional assessment and risk stratification (SBST) | <p>GP or other first contact professional initial management:</p> <ul style="list-style-type: none"> <li>- Advice on self-management or referral to secondary care or referral to TTP</li> <li>- If referral to TTP: assessment + referral to a combination of core therapies (education + manual therapy + exercise) or intensive CPPP (residential programme of intensive exercise + education + support with long-term self-management)</li> </ul>                                                                                                                                                                                                                                           | <ul style="list-style-type: none"> <li>- If not improved, referral for Pain Management Services and specialist spinal surgical options</li> </ul>                                                                                                                                                    | <ul style="list-style-type: none"> <li>- After initial management</li> <li>- After treatments: not reported</li> </ul>                                                             |
|                              | (22,23)<br>North<br>East | GP referral                                     | GP risk stratification (SBST) + referral to TTP                                  | <p>GP deliver care to low-risk patients:</p> <ul style="list-style-type: none"> <li>- Low risk: advice + education</li> </ul> <p>TTP assessment and delivery of risk-matched group care:</p> <ul style="list-style-type: none"> <li>- Referral to further investigations if necessary;</li> <li>- Moderate to high risk: Core therapies (PT incorporating exercise, manual therapy or acupuncture) or CPPP (100-hour residential, combined physical and psychological therapies program for a small number of patients)</li> </ul>                                                                                                                                                              | Not reported                                                                                                                                                                                                                                                                                         | <ul style="list-style-type: none"> <li>- Low-risk patients: after initial consultation</li> </ul>                                                                                  |
| Beating Back Pain Service    | (24)                     | GP, PT or osteopath referral to BBPS            | No assessment before group session                                               | <p>GP and occupational therapist deliver care to all patients</p> <ul style="list-style-type: none"> <li>- 2h group session of education on pain and self-management + BBPS pack (booklet + CD with information and mobility and strength exercises) + SBST assessment + referral to combination of care according to patient preference (individualized combination of acupuncture, self-management groups and/or BBPS packs):</li> <li>- Acupuncture: Up to 6 weekly sessions (30 minutes) of individualized TCM acupuncture treatment;</li> <li>- Self-management groups: group sessions of education on self-management + goal setting + mindfulness + CBT.</li> <li>- BBPS pack</li> </ul> | Not reported                                                                                                                                                                                                                                                                                         | Not reported                                                                                                                                                                       |
| North East Essex PCT service | (25)                     | GP referral to the manual therapy service       | GP assessment                                                                    | <ul style="list-style-type: none"> <li>- GP deliver usual care (advice + reassurance + analgesia) to all patients for 4-6 weeks + referral to chiropractor/osteopath/PT according to patient preference.</li> <li>- Chiropractor/Osteopath/PT care: Up to 6 sessions of manual therapy or additional treatments with GP approval</li> </ul>                                                                                                                                                                                                                                                                                                                                                     | <p>If no improvements, referral to psychotherapy/CBT or referral to secondary care via GP recommendation (surgical/ radiological/ pain consultant)</p>                                                                                                                                               | <ul style="list-style-type: none"> <li>- Discharge and referral back to GP after chiropractor/Osteopath/PT care with a report of recommendations for further management</li> </ul> |

|                             |      |                                                                                                                                                                     |                                                                                                                                                                |                                                                                                                                                                                                                                                                                                                                                                                                                                                                                                                                                                                                                                                                  |                                                                                                                                                                                                                                                                                                                                                                                                                                                                                                                 |                                                                                                                                                                                                                       |
|-----------------------------|------|---------------------------------------------------------------------------------------------------------------------------------------------------------------------|----------------------------------------------------------------------------------------------------------------------------------------------------------------|------------------------------------------------------------------------------------------------------------------------------------------------------------------------------------------------------------------------------------------------------------------------------------------------------------------------------------------------------------------------------------------------------------------------------------------------------------------------------------------------------------------------------------------------------------------------------------------------------------------------------------------------------------------|-----------------------------------------------------------------------------------------------------------------------------------------------------------------------------------------------------------------------------------------------------------------------------------------------------------------------------------------------------------------------------------------------------------------------------------------------------------------------------------------------------------------|-----------------------------------------------------------------------------------------------------------------------------------------------------------------------------------------------------------------------|
| ISAEC                       | (26) | PCP referral to ISAEC (could order MRI)                                                                                                                             | APC evaluation and stratification by pattern diagnosis                                                                                                         | <p>APC deliver care according to clinical presentation patterns:</p> <ul style="list-style-type: none"> <li>- Back dominant pattern (surgery unlikely): APC education and management (Physiatry/pain clinic, counselling, rheumatology, self-management, allied health management)</li> <li>- Leg dominant (surgery likely): referral to spine surgeon (imaging, blocks, surgery, nonoperative)</li> </ul>                                                                                                                                                                                                                                                       | <ul style="list-style-type: none"> <li>- Back dominant pattern (surgery unlikely): recommendations communicated to referring PCP.</li> <li>- Leg dominant (surgery likely): APC education and management (Physiatry/pain clinic, counselling, rheumatology, self-management, allied health management) + recommendations communicated to referring PCP.</li> </ul>                                                                                                                                              | Not reported                                                                                                                                                                                                          |
| Saskatchewan Spine Pathway  | (27) | Physician referral to SSP clinic                                                                                                                                    | Patients triage into Group A (non-surgical management) or Group B (spine surgeon assessment)                                                                   | <ul style="list-style-type: none"> <li>- Group A: education including self-care instruction, medication advice and/or mechanical therapies</li> <li>- Group B – surgical consultation (imaging and surgery)</li> </ul>                                                                                                                                                                                                                                                                                                                                                                                                                                           | <ul style="list-style-type: none"> <li>- Group A: follow-up by the SSP clinic when required</li> </ul>                                                                                                                                                                                                                                                                                                                                                                                                          | <ul style="list-style-type: none"> <li>- Group A: Discharge after care delivery</li> <li>- Group B: Not reported</li> </ul>                                                                                           |
|                             | (28) | <ul style="list-style-type: none"> <li>- Group A: Referred by neurosurgeons at the SSP clinic</li> <li>- Group B: Referred by physicians at primary care</li> </ul> | <p>Physicians (at PHC) or specialized PTs (at SSP clinics) assessment</p> <p>If red flags present, referral for emergency (imaging + surgery consultation)</p> | <ul style="list-style-type: none"> <li>- Group A (SSP clinic): assessment (directly) or reassessment (from PHC referral) of pattern diagnosis + treatment according to SSP classification (pattern diagnosis). If patient improves, continue treatment in PHC.</li> <li>- Group B (PHC referral): treatment according to SSP classification in PHC.</li> </ul> <p>Treatment according to SSP classification:</p> <ul style="list-style-type: none"> <li>- Pattern 1, 2 and 4: Reassurance + Advice and Information + Treatment schedule (position, movement, pharmacology and adjunct therapies)</li> <li>- Pattern 3: Similar, but exclude exercise.</li> </ul> | <p>Group A: If no improvement:</p> <ul style="list-style-type: none"> <li>- Pattern 1 e 2 – Refer back to PHC with recommendations for additional mechanical treatment and referral to surgery if symptoms persist after 6 months;</li> <li>- Pattern 3 – Urgent referral for imaging + surgery consultation if pain persist after 6 weeks;</li> <li>- Pattern 4 – Non-urgent referral for imaging + surgery consultation.</li> </ul> <p>Group B (PHC referral): If no improvement, referral to SSP clinic.</p> | Not reported                                                                                                                                                                                                          |
| Back pain Assessment Clinic | (29) | GP referral to Royal Melbourne Hospital + Surgeon’s referral to BAC                                                                                                 | Rheumatologist, neurosurgeon, orthopaedic spinal surgeon or APP (PTs) assessment                                                                               | <p>If BAC consultation:</p> <ul style="list-style-type: none"> <li>- Referral to community treatment services (12-week community-based spinal rehabilitation programme seen within 2–4 weeks)</li> <li>- Referral to rheumatology, orthopaedics, neurosurgery or pain services</li> </ul>                                                                                                                                                                                                                                                                                                                                                                        | <ul style="list-style-type: none"> <li>- Outpatient specialist clinics (Rheumatology, Orthopaedics, Neurosurgery, Pain services)</li> </ul>                                                                                                                                                                                                                                                                                                                                                                     | <ul style="list-style-type: none"> <li>- To initial referrer after BAC assessment;</li> <li>- After orthopaedics or neurosurgery consultations</li> <li>- After community treatment services: Not reported</li> </ul> |

**Abbreviations:**

APC - Advanced Practice Clinician; APP - Advanced Practice Physiotherapist; BAC – Back pain Assessment Clinic; BBPS – Beating Back Pain Service; CAM - Complementary and Alternative Medicine; CBT – Cognitive Behavioural Techniques; CCCP - Combined Physical and Psychological Therapies program; EBP – Evidence-Based Practice; GPs – General Practitioner; HCP – Health Care Provider; ISAEC – Inter-professional Spine Assessment and Education Clinics; LBP – Low Back Pain; MoC – Model of Care; NERBPP – North East Low Back and Radicular Pain Pathway; PCP – Primary Care Provider; PHC – Primary Healthcare; PIPT - Psychologically Informed Physical Therapy; PT – Physiotherapy; PTs – Physiotherapists; SBST – Start Back Screening Tool; SSP – Saskatchewan Spine Pathway; TCM – Traditional Chinese Medicine; TTPs - Triage and Treat practitioners;

# BMJ Open

## Low Back Pain Management in Primary Healthcare: Findings from a Scoping Review on Models of Care

|                                 |                                                                                                                                                                                                                                                                                                                                                                                                                                                                                                                                                                                                                                                                                                                                                                                                                                                                                                                                                                                                                                                                                                                                                                                                                                               |
|---------------------------------|-----------------------------------------------------------------------------------------------------------------------------------------------------------------------------------------------------------------------------------------------------------------------------------------------------------------------------------------------------------------------------------------------------------------------------------------------------------------------------------------------------------------------------------------------------------------------------------------------------------------------------------------------------------------------------------------------------------------------------------------------------------------------------------------------------------------------------------------------------------------------------------------------------------------------------------------------------------------------------------------------------------------------------------------------------------------------------------------------------------------------------------------------------------------------------------------------------------------------------------------------|
| Journal:                        | <i>BMJ Open</i>                                                                                                                                                                                                                                                                                                                                                                                                                                                                                                                                                                                                                                                                                                                                                                                                                                                                                                                                                                                                                                                                                                                                                                                                                               |
| Manuscript ID                   | bmjopen-2023-079276.R1                                                                                                                                                                                                                                                                                                                                                                                                                                                                                                                                                                                                                                                                                                                                                                                                                                                                                                                                                                                                                                                                                                                                                                                                                        |
| Article Type:                   | Original research                                                                                                                                                                                                                                                                                                                                                                                                                                                                                                                                                                                                                                                                                                                                                                                                                                                                                                                                                                                                                                                                                                                                                                                                                             |
| Date Submitted by the Author:   | 25-Mar-2024                                                                                                                                                                                                                                                                                                                                                                                                                                                                                                                                                                                                                                                                                                                                                                                                                                                                                                                                                                                                                                                                                                                                                                                                                                   |
| Complete List of Authors:       | Duarte, Susana; NOVA University Lisbon Comprehensive Health Research Centre, National School of Public Health; Polytechnic Institute of Setúbal School of Health Care, Department of Physiotherapy<br>Moniz, Alexandre; NOVA University Lisbon Comprehensive Health Research Centre, NOVA Medical School   Faculdade de Ciências Médicas, NMS   FCM; Polytechnic Institute of Setúbal School of Health Care, Department of Physiotherapy<br>Costa, Daniela; Escola Superior de Saúde do Alcoitão, Department of Physiotherapy; Polytechnic Institute of Setúbal School of Health Care, Department of Physiotherapy<br>Donato, Helena; Centro Hospitalar e Universitário de Coimbra EPE, Documentation and Scientific Information Service; University of Coimbra Faculty of Medicine,<br>Heleno, B; NOVA University Lisbon Comprehensive Health Research Centre, NOVA Medical School   Faculdade de Ciências Médicas, NMS   FCM<br>Aguiar, Pedro; NOVA University Lisbon NOVA National School of Public Health; NOVA University Lisbon Comprehensive Health Research Centre<br>Cruz, Eduardo; Polytechnic Institute of Setúbal School of Health Care, Department of Physiotherapy; NOVA University Lisbon Comprehensive Health Research Centre |
| <b>Primary Subject Heading</b>: | Health services research                                                                                                                                                                                                                                                                                                                                                                                                                                                                                                                                                                                                                                                                                                                                                                                                                                                                                                                                                                                                                                                                                                                                                                                                                      |
| Secondary Subject Heading:      | Evidence based practice, General practice / Family practice, Patient-centred medicine, Rehabilitation medicine                                                                                                                                                                                                                                                                                                                                                                                                                                                                                                                                                                                                                                                                                                                                                                                                                                                                                                                                                                                                                                                                                                                                |
| Keywords:                       | Back pain < ORTHOPAEDIC & TRAUMA SURGERY, Musculoskeletal disorders < ORTHOPAEDIC & TRAUMA SURGERY, PAIN MANAGEMENT, Primary Health Care, Health Services, Organisation of health services < HEALTH SERVICES ADMINISTRATION & MANAGEMENT                                                                                                                                                                                                                                                                                                                                                                                                                                                                                                                                                                                                                                                                                                                                                                                                                                                                                                                                                                                                      |
|                                 |                                                                                                                                                                                                                                                                                                                                                                                                                                                                                                                                                                                                                                                                                                                                                                                                                                                                                                                                                                                                                                                                                                                                                                                                                                               |

SCHOLARONE™  
Manuscripts



I, the Submitting Author has the right to grant and does grant on behalf of all authors of the Work (as defined in the below author licence), an exclusive licence and/or a non-exclusive licence for contributions from authors who are: i) UK Crown employees; ii) where BMJ has agreed a CC-BY licence shall apply, and/or iii) in accordance with the terms applicable for US Federal Government officers or employees acting as part of their official duties; on a worldwide, perpetual, irrevocable, royalty-free basis to BMJ Publishing Group Ltd ("BMJ") its licensees and where the relevant Journal is co-owned by BMJ to the co-owners of the Journal, to publish the Work in this journal and any other BMJ products and to exploit all rights, as set out in our [licence](#).

The Submitting Author accepts and understands that any supply made under these terms is made by BMJ to the Submitting Author unless you are acting as an employee on behalf of your employer or a postgraduate student of an affiliated institution which is paying any applicable article publishing charge ("APC") for Open Access articles. Where the Submitting Author wishes to make the Work available on an Open Access basis (and intends to pay the relevant APC), the terms of reuse of such Open Access shall be governed by a Creative Commons licence – details of these licences and which [Creative Commons](#) licence will apply to this Work are set out in our licence referred to above.

Other than as permitted in any relevant BMJ Author's Self Archiving Policies, I confirm this Work has not been accepted for publication elsewhere, is not being considered for publication elsewhere and does not duplicate material already published. I confirm all authors consent to publication of this Work and authorise the granting of this licence.

## Title Page

**Low Back Pain Management in Primary Healthcare: Findings from a Scoping Review on Models of Care**Susana Tinoco Duarte<sup>1,2\*</sup>,Alexandre Moniz<sup>3,4</sup>,Daniela Costa<sup>2,5</sup>,Helena Donato<sup>6,7</sup>,Bruno Heleno<sup>3</sup>,Pedro Aguiar<sup>1,8</sup>,Eduardo B Cruz<sup>1,2</sup>

<sup>1</sup>Comprehensive Health Research Center (CHRC), National School of Public Health, Universidade NOVA de Lisboa, Lisbon, Portugal;

<sup>2</sup>Physiotherapy Department, School of Health Care, Polytechnic Institute of Setúbal, Setúbal, Portugal;

<sup>3</sup>Comprehensive Health Research Center (CHRC), NOVA Medical School | Faculdade de Ciências Médicas, NMS | FCM, Universidade NOVA de Lisboa, Lisbon, Portugal;

<sup>4</sup>EpiDoc Unit, NOVA Medical School | Faculdade de Ciências Médicas, NMS | FCM, Universidade Nova de Lisboa, Lisbon, Portugal;

<sup>5</sup>Physiotherapy Department, Escola Superior de Saúde de Alcoitão, Santa Casa da Misericórdia de Lisboa, Portugal;

<sup>6</sup>Documentation and Scientific Information Service, Centro Hospitalar e Universitário de Coimbra EPE, Coimbra, Portugal;

<sup>7</sup>Faculty of Medicine, University of Coimbra, Coimbra, Portugal;

<sup>8</sup>National School of Public Health, Universidade NOVA de Lisboa, Lisbon, Portugal;

**\*Corresponding author**

Susana Patrícia Tinoco da Silva Duarte

[sp.duarte@ensp.unl.pt](mailto:sp.duarte@ensp.unl.pt)

Comprehensive Health Research Center (CHRC)

NOVA National School of Public Health

Avenida Padre Cruz

Lisboa, 1600-560

Portugal

**Total manuscript word count: 4291 words**

## Manuscript

**Low Back Pain Management in Primary Healthcare: Findings from a Scoping Review on Models of Care****ABSTRACT**

**Introduction:** Models of care (MoCs) describe evidence-informed healthcare that should be delivered to patients. Several MoCs have been implemented for low back pain (LBP) to reduce evidence-to-practice gaps and increase the effectiveness and sustainability of healthcare services.

**Objective:** To synthesize research evidence regarding core characteristics and key common elements of MoCs implemented in primary healthcare for the management of LBP.

**Design:** Scoping review.

**Data sources:** Searches on MEDLINE(Pubmed), EMBASE, Cochrane Central Register of Controlled Trials, PEDro, Scopus, Web of Science and grey literature databases were conducted.

**Eligibility criteria:** Eligible records included MoCs implemented for adult LBP patients in primary healthcare settings.

**Data extraction and synthesis:** Data extraction was carried out independently by two researchers and included a summary of the studies, the identification of the MoCs and respective key elements, concerning levels of care, settings, health professionals involved, type of care delivered and core components of the interventions. Findings were investigated through a descriptive qualitative content analysis using a deductive approach.

**Results:** Twenty-nine studies reporting 11 MoCs were included. All MoCs were implemented in high-income countries and had clear objectives. Ten MoCs included a stratified care approach. Assessment of LBP patients typically occurred in primary healthcare, while care delivery usually took place in community-based settings or outpatient clinics. Care provided by general practitioners and physiotherapists was reported in all MoCs. Education (n=10) and exercise (n=9) were the most common health interventions. However, intervention content, follow-ups and discharge criteria were not fully reported.

**Conclusions:** This study examines the features of MoCs for LBP, highlighting that research is in its early stages and stressing the need for better reporting to fill gaps in care delivery and implementation. This knowledge is crucial for researchers, clinicians and decision-makers in assessing the applicability and transferability of MoCs to primary healthcare settings.

**Keywords:** Low back pain; models of care; primary healthcare; implementation science

**Registration:** Open Science Framework Registries (<https://osf.io/rsd8x>)



1  
2  
3 71 **ARTICLE SUMMARY**  
4

5 72 **Strengths and limitations of this study**  
6

- 7 73 - To the best of our knowledge, this is the first study aiming to map the available evidence regarding  
8 74 the core characteristics and key elements of MoCs implemented in primary healthcare for the  
9 75 management of LBP.  
10  
11 76 - To aid the transparency and methodological rigour of this study, it followed the Joanna Briggs  
12 77 Institute Methodological Guidelines and Preferred Reporting Items for Systematic Reviews and  
13 78 Meta-Analysis extension for Scoping Reviews.  
14  
15 79 - One limitation of this review is potential selection bias due to search strategies and language  
16 80 restrictions, as well as heterogeneity in MoC terminologies.  
17  
18 81 - Strategies to overcome potential limitations included the use of a broad search strategy across  
19 82 databases, an overinclusion approach during article screening and regular team discussions  
20 83 during data extraction and analysis.  
21  
22 84 - This study offers a comprehensive understanding of key characteristics of the MoCs implemented  
23 85 for LBP patients in primary healthcare, which may help clinicians and decision-makers to plan  
24 86 implementation of MoCs in real-world settings, as well as researchers defining avenues to  
25 87 overcome the current evidence-to-practice gaps.  
26  
27  
28  
29  
30  
31  
32  
33  
34  
35  
36  
37  
38  
39  
40  
41  
42  
43  
44  
45  
46  
47  
48  
49  
50  
51  
52  
53  
54  
55  
56  
57  
58  
59  
60

## 88 INTRODUCTION

89 Low back pain (LBP) is a significant global public health concern, acknowledged as the leading contributor  
90 to disability worldwide. In 2020, 619 million (95% UI 554–694) people reported having this health condition  
91 and prevalence projections suggest it will escalate to 843 million (95% UI 759–933) by 2050, an increase  
92 in total cases of 36.4%(1). It is recognised that the burdensomeness of LBP is related to long-term  
93 disability and poor health-related quality of life(2–4), associated with more medical costs and utilisation of  
94 healthcare resources, such as medication, medical appointments, imaging and physiotherapy(2,5–7).  
95 Thus, LBP represents a growing burden for individuals, society and healthcare systems.

96 Although care delivery may vary between health systems, primary healthcare is recognised as the  
97 appropriate setting to manage LBP(8,9), which is already one of the most common reasons for general  
98 practice consultations worldwide(8,10). Accompanying the estimates of the rising prevalence of LBP, it is  
99 also expected a significant increase in primary healthcare workload in the upcoming years(9), so there is  
100 an urgent need to develop efficient and sustainable solutions to face these healthcare challenges.

101 Additionally, evidence shows there is a present gap between the recommended practice for LBP and the  
102 care provided in real-world contexts(9). Current patterns of care may vary between settings and lack  
103 alignment with clinical practice guideline recommendations, which succinctly endorses the delivery of  
104 nonpharmacological interventions, such as education and exercise, and manual therapy as an adjuvant  
105 treatment(8,11–14). However, many LBP patients receive unnecessary low-value care, which does not  
106 align with quality standards(14,15), leads to poor clinical outcomes(4,16) and waste healthcare  
107 resources(17–19). Therefore, system-level reform strategies are necessary to overcome these evidence-  
108 to-practice gaps and to promote the delivery of high-quality care to LBP patients(9,17,20).

109 The implementation of models of care (MoCs) is one of the most promising strategies suggested to  
110 increase the responsiveness of health systems to the impact of LBP. A Model of Care (MoC) is a person-  
111 centred approach that outlines evidence-informed best practices for managing specific health  
112 conditions(21–23). It details the optimal care that should be provided and the methods for its  
113 implementation. MoCs are built upon clinical guidelines - drawing from up-to-date recommendations –  
114 and they primarily serve to translate these recommendations into actionable strategies(23). While clinical  
115 pathways focus on the integrated delivery of care to patients with a specific condition, MoCs go beyond  
116 this aspect, focusing much of their attention on the factors that determine a successful  
117 implementation(22,23).

118 The principles of MoCs are in line with the quadruple aim of value-based care, targeting better health  
119 outcomes, better patient and health professional experiences and improved use of healthcare  
120 resources(17,21). MoCs usually reflect regional or national health policies that are implemented as health  
121 services in local settings(22,24). When implemented locally, a MoC include the key core components  
122 from the system-level framework, but other elements should be adapted to meet the specific context and  
123 needs(17). The operationalisation of a MoC for local service delivery is usually designated as *model of*  
124 *service delivery*(17).

1  
2  
3 125 Several MoCs have been implemented for LBP patients over the last few years in different countries.  
4 126 Commonly, these MoCs deliver care through stepped or stratified approaches, supporting the decision-  
5 127 making process. In stepped care, all patients are initially offered the same treatment options and more  
6 128 complex care is only proposed if they have not recovered sufficiently, while, in risk-stratified MoCs,  
7 129 patients are stratified according to their prognosis at initial assessment and treatment is targeted to patient  
8 130 subgroups, with more comprehensive care offered to those at risk of poor outcomes(25).

9 131 Although some MoCs reveal promising results regarding their effectiveness and cost-effectiveness(9,23),  
10 132 they are very heterogeneous in terms of their characteristics, making it difficult to assess the suitability of  
11 133 a MoC to a given context over another. These characteristics include, but are not limited to, the target  
12 134 population, clinical pathways, levels of care and health professionals involved, type of care  
13 135 (stepped/stratified approaches), health interventions and context features.

14 136 Two recent reviews(26,27) have analysed the evidence on initiatives for implementing LBP management.  
15 137 One review focuses specifically on MoCs implemented in Australia(26). The other, a systematic  
16 138 review(27), aims to describe clinical pathways and care integration across different levels of care, without  
17 139 focusing on the details of care delivery and implementation. Therefore, our work seeks to expand on these  
18 140 contributions by providing a broader overview of the diversity, content and resource requirements of MoCs  
19 141 for LBP patients. This is important information to support policy makers, managers, clinicians in the  
20 142 development and implementation planning of MoCs, as well as pinpoint evidence gaps related to  
21 143 implementation in real-world settings.

22 144

## 23 145 **METHODS**

24 146 A scoping review was deemed the most appropriate study design to answer the research questions as it  
25 147 aims to map the available evidence and identify characteristics or factors related to an emerging and  
26 148 complex concept(28,29). The uncertainty regarding the evidence sources, methodologies and amount  
27 149 and quality of available data determined the choice of this approach.

28 150 This study was conducted in accordance with the Joanna Briggs Institute (JBI) scoping review guidance  
29 151 and the Preferred Reporting Items for Systematic Reviews and Meta-Analyses extension for scoping  
30 152 reviews (PRISMA-ScR) (Supplementary File 1). The protocol was registered within the Open Science  
31 153 Framework Registries (<https://osf.io/rsd8x>) and it was published elsewhere(30).

32 154

### 33 155 ***Patient and Public Involvement***

34 156 Patients and public were not included in the design, conduct, or reporting of this research as it is targeted  
35 157 for researchers, clinicians, managers and policy makers.

36 158

37 159

38 160

### 161 **Research Question and Aims**

162 The research question of this review is 'What are the key characteristics of MoCs implemented in primary  
163 healthcare for patients with LBP?' Our objectives are to identify which MoCs have been implemented for  
164 LBP management, describe their main characteristics and commonalities in care delivery, and highlight  
165 any gaps in knowledge regarding their real-world implementation.

### 167 **Inclusion Criteria**

168 Eligibility criteria were defined through the Population, Concept, Context (PCC) framework(28,29). Target  
169 population are LBP patients, with or without radicular pain, of any duration, excluding specific causes or  
170 serious pathologies. Records including broader populations, such as "musculoskeletal pain" or "spinal  
171 pain", were also excluded. MoC was defined as the provision and delivery of care in a local setting,  
172 including service planning, care coordination and management of services(21,22,31). Operational criteria  
173 were defined to differentiate a MoC from intervention programmes(22,30). Regarding the context, MoCs  
174 were included if they were developed in primary healthcare or other levels of healthcare delivery, as long  
175 as they included primary care interventions in the clinical pathway(31).

### 177 **Search Strategy**

178 A comprehensive search was conducted on MEDLINE(PubMed), EMBASE, Cochrane Central Register  
179 of Controlled Trials, PEDro, Scopus, and Web of Science, as well as grey literature sources (Figure 1).  
180 Hand searching was performed in peer-reviewed journals and relevant organisation websites(32).  
181 Additional studies were identified through reference list screening. Initial searches conducted in May 2021  
182 used key terms like "low back pain," "model of care" and "primary care". Subsequent tailored searches  
183 across all databases were performed (Supplementary File 2). Only records published since 2000 were  
184 considered as we aim to examine evidence-based and coordinated healthcare delivery for LBP, reflecting  
185 the current concept of MoC. Language restrictions for English, Portuguese, or Spanish were established  
186 due to practical constraints related to the availability of translation resources. The search commenced in  
187 January 2022 and was last updated in December 2022, with search strategies reviewed and conducted  
188 by an experienced information scientist (HD).

190 **[Please insert Figure 1 – PRISMA flow diagram showing the identification, screening, eligibility  
191 and inclusion process of the articles]**

### 193 **Study Selection**

194 Records were imported to EndNote X9 (Clarivate Analytics, USA) for screening and duplicate removal.  
195 Two reviewers independently screened titles and abstracts (STD and DC). Eligibility criteria were tested  
196 with a random sample of 25 records. Afterwards, full-text screening was performed by two researchers

1  
2  
3 197 (STD and AM), with a pilot test on 10 studies for consistency. Disagreements were discussed with a third  
4 198 reviewer (DC).

5  
6 199

### 7 8 200 **Data Charting**

9  
10 201 To ensure data extraction transparency(28), a standardised form (Supplementary File 3) was developed  
11 202 and piloted, covering a summary of the studies, the identification and description of the MoC (name,  
12 203 country, target population, main objectives) and respective key elements (levels of care and settings,  
13 204 health professionals involved, type of care delivered and core components of health interventions). Two  
14 205 researchers (STD and AM) extracted data independently and resolved uncertainties with the research  
15 206 team. Only relevant data to the research question were extracted, and when necessary, the authors were  
16 207 contacted for clarifications. Regular video meetings were held for data review and process updates.

17  
18 208

### 19 209 **Synthesis and Presentation of Results**

20  
21 210 Findings were synthesised through deductive content analysis in 3 phases: preparation, organisation, and  
22 211 reporting(33). Data is presented in narrative, tabular, and chart formats for each MoC for LBP  
23 212 management. Descriptive results include the identification of the MoCs, their general description, and key  
24 213 elements, while quantitative results refer to frequency counts of the data.

25  
26 214

### 27 215 **Protocol Deviations**

28  
29 216 Four research questions were framed in the protocol of this study(30). However, during the processes of  
30 217 data extraction and analysis, it became clear that the complexity of the topic and richness of the available  
31 218 data justified a rigorous description and interpretation of the findings. Therefore, findings on patient-,  
32 219 system- and implementation-related outcomes of MoCs and context-specific factors (macro, meso, micro  
33 220 and multiple levels) contemplated in their implementation will be reported in a subsequent paper.  
34 221 Additionally, one criterion was added to those published in the protocol, which is the MoC is not digital  
35 222 (e.g. telemedicine, telerehabilitation, web-based programs and/or mobile apps).

36  
37 223

## 38 224 **RESULTS**

39  
40 225

### 41 226 **Search Results**

42 227 The PRISMA flow diagram (Figure 1) outlines the search and selection process. From the 4081 records  
43 228 yielded in first instance, 29 studies(34–62), published between 2011 and 2022, were included. They  
44 229 portray 11 MoCs implemented in primary healthcare.

45  
46 230

### 231 *Characteristics of the Included Studies*

232 Table 1 identifies each MoC and their corresponding studies. Quantitative studies (n=19) mainly consisted  
233 of randomised controlled trials (n=9) and observational cohorts (n=9). These studies assessed the clinical  
234 effectiveness and efficacy of 9 MoCs(34,39,42,44,46,48,49,51,55,57,58,60–62) and healthcare resources  
235 utilisation of 7 MoCs(34,39,46,52–54,56–58,60–62). Only BetterBack<sup>©</sup> was evaluated for healthcare  
236 quality(43) and economic evaluations were solely performed for 3 MoCs(34,35,46,58,60,61). Qualitative  
237 studies (n=5; 5 MoCs) focused on implementation outcomes and strategies(36,37,41,45,59), while mixed  
238 methods studies (n=5; 3 MoCs) investigated patient and organisational outcomes, as well as the  
239 experiences of different stakeholders(38,47,50). Detailed characteristics of the studies, including eligibility  
240 criteria, sample sizes, outcomes and outcome measures, can be found in Supplementary File 4.

241

242 **[Please Insert Table 1 – MoCs identification and corresponding studies]**

243

### 244 **General Description**

245 The 11 MoCs implemented in primary healthcare for the management of LBP patients are the STarT Back  
246 (34,35,46,56–58), SCOPiC(59–61), MATCH(36,62), TARGET(37–39), BetterBack<sup>©</sup> Model of Care(40–  
247 43), Low Back and Radicular Pain Pathway(44,45,47–49), Beating Back Pain Service (BBPS)(50), North  
248 East Essex Primary Care Trust (PCT) manual therapy service(51), Interprofessional Spine Assessment  
249 and Education Clinics (ISAEC)(52), Saskatchewan Spine Pathway(SSP)(53,54) and Back Pain  
250 Assessment Clinic (BAC)(55).

251 All MoCs were implemented in high-income countries from Europe, North America and Australia (Figure  
252 2). Most implementations (n=5) were set in the United Kingdom (UK), followed by the United States of  
253 America (USA) (n=2) and Canada (n=2). STarT Back(34,35,46,56–58) was the only MoC implemented in  
254 three countries (UK, Ireland and Denmark). However, adaptations of this MoC, with significant  
255 adjustments to its core characteristics, were also implemented in the USA (MATCH and TARGET)(36–  
256 39,62) and Sweden (BetterBack<sup>©</sup>)(40–43).

257

258 **[Please insert Figure 2 – Geographical representation of the MoCs (n=11) implemented for LBP in**  
259 **primary healthcare worldwide]**

260

261 The target population of the MoCs involved adults with LBP, with or without radicular pain, or  
262 radiculopathy. North East Essex PCT manual therapy service(51) and BAC(55) also included patients  
263 with neck pain. BBPS(50) and Irish STarT Back(57) were the only MoCs that established the duration of  
264 pain as an eligibility criterion, namely, the presence of LBP for more than 6 weeks and 3 months,  
265 respectively (Supplementary File 4).

1  
2  
3 266 Most MoCs (n=8) aimed to promote evidence-informed practice to improve clinical effectiveness. They  
4 267 were informed by national or international clinical practice guidelines to design the service delivery and  
5 268 health interventions for the management of LBP. Only Canadian MoCs, ISAEC(52) and SSP(53,54), did  
6 269 not specify the guidelines they followed, although the studies mentioned the need to provide care in line  
7 270 with current recommendations.

8  
9  
10 271 MoCs comprising more than one level of care, such as interface services and/or secondary care  
11 272 (44,45,48,49,52–55,59–61), were especially concerned with reducing waiting times and optimising  
12 273 referral behaviours for imaging, care delivery and specialist review. Goals related to equitable access to  
13 274 care were only identified for the Low Back Pain and Radicular Pain Pathway(44) and the North East Essex  
14 275 PCT manual therapy service(51).

15  
16  
17  
18 276 The majority of MoCs were implemented within the National Healthcare Systems through local (n=3) and  
19 277 regional (n=7) pathways. Only the Low Back Pain and Radicular Pain Pathway refers to a national  
20 278 MoC(44,45), MATCH(36,62) and TARGET(37–39) were implemented in integrated healthcare delivery  
21 279 systems of the USA. Additionally, only four MoCs (Danish STarT Back, SCOPiC, TARGET and  
22 280 ISAEC)(39,52,58,60) were implemented in different geographical areas, covering urban, inner city and  
23 281 rural settings.

24  
25  
26  
27 282 Table 2 presents detailed information on the general characteristics of the different MoCs, including target  
28 283 population, goals, type of care, settings and health professionals involved in care delivery.

29  
30  
31 284

32  
33 285 **[Please insert Table 2 – General characteristics of the MoCs]**

34  
35 286

### 36 37 287 ***Settings and Healthcare Professionals***

38  
39 288 Most MoCs (n=10) for LBP encompass multiple healthcare setting. General practices serve as the entry  
40 289 point for 8 MoCs, being important in the initial management of LBP patients. These MoCs ensure  
41 290 continuity of care in outpatient physiotherapy clinics and community care settings, where patients receive  
42 291 the main health interventions. SCOPiC(59–61), Low Back and Radicular Pain Pathway(44,45,47–49) and  
43 292 BAC(55) also include other settings, such as interface, secondary and tertiary care services.  
44 293 MATCH(36,62), TARGET(37–39) and BetterBack<sup>®</sup>(40–43) were exclusively implemented in primary  
45 294 healthcare clinics featuring onsite physiotherapy departments.

46  
47  
48  
49 295 The health professionals who most commonly deliver care in MoCs are general practitioners and  
50 296 physiotherapists. General practitioners are primarily involved in the initial assessment and referral of  
51 297 patients receiving health services, whereas physiotherapists oversee the rehabilitation process. Four  
52 298 models also include osteopaths, chiropractors, and acupuncturists(44,45,50–52), depending on the  
53 299 integration of these professionals within the specific healthcare system of each country. MoCs that  
54 300 incorporate more than one level of care(44,45,53–55,59–61) comprise consultations of medical  
55 301 specialties with surgeons and rheumatologists. Four MoCs(44,45,47–49,52–54,59–61) also include

302 advanced practice clinicians, usually physiotherapists specialised in triage processes and identification  
303 and management of red flags and emergency conditions.

304

### 305 ***Type of Care***

306 The majority of MoCs (n=7) use a stratified care approach, targeting health intervention to patients'  
307 subgroups based on their prognostic profile and/or pattern diagnosis. Less treatment is given to those  
308 who are at low risk or whose signs and symptoms are less severe, while high-risk patients receive more  
309 specialised treatment or are referred to secondary care. The only MoC that is characterised by a stepped  
310 approach is the BAC(55), being essentially a health service dedicated to the screening and referral of  
311 LBP patients.

312 Hybrid care, combining stratified and stepped approaches, was identified in four MoCs. BetterBack<sup>®</sup>(40–  
313 43) and Low Back and Radicular Pain Pathway(44,45,47–49) stratify patients based on clinical prognosis.  
314 If there are no improvements after the main health intervention, patients are referred to additional group  
315 care in BetterBack<sup>®</sup>(40–43) and to Pain Management Services and specialist spinal surgical options in  
316 the Low Back and Radicular Pain Pathway(44,45,47–49). In BBPS(50) and North East Essex PCT  
317 service(51), the stepped care occurs first through education sessions and usual general practitioner care,  
318 respectively. Patients are stratified a posteriori based on their treatment preferences, such as care  
319 provided by physiotherapists, osteopaths or chiropractors. Figure 3 and Table 2 summarise the type of  
320 care provided in each MoC.

321

322 **[Please insert Figure 3 – Sunburst chart representing the different approaches of care delivered  
323 by the MoCs]**

324

### 325 ***Core Components of MoCs***

326 To facilitate the reporting, core components were separated into five moments, which correspond to  
327 Referral, Assessment, Health Interventions, Follow-ups and Discharge. These elements are presented in  
328 Supplementary File 5.

329

### 330 ***Referral and Assessment***

331 As aforementioned, the initial consultation with a general practitioner is an entry point on the pathway in  
332 all MoCs. In 3 MoCs(34,35,40–45), self-referral through direct access to services is possible, as well as  
333 referral by other health professionals (MATCH, TARGET and ISAEC). Surgeons are the main referrers in  
334 SSP(53,54) and BAC(55).

335 The assessment of LBP patients concerns mainly the exclusion of red flags, physical assessment and  
336 stratification. Physiotherapists are the most common health professionals (n=9) to carry out the  
337 assessment, followed by the GP and triage specialists. The only model that does not carry out an



1  
2  
3 338 assessment before an intervention is the BBPS(50), which is only performed after a group education  
4 339 session.

5  
6 340

7  
8 341 *Health Interventions*

9  
10 342 Education (n=10), exercise (n=9) and manual therapy (n=7) were the key core elements of MoCs reported  
11 343 by most studies. With the exception of North East Essex PCT service(51) and BAC(55), all MoCs included  
12 344 at least a minimal education intervention, focusing on the reassurance about the benign nature of LBP  
13 345 and self-management strategies. These messages were communicated directly by the health  
14 346 professionals or through support tools, such as written information, DVDs and online content.

15  
16 347 In MoCs that include a stratified approach, patients receive appropriate matched treatments, with different  
17 348 doses of education, exercise and manual therapy, according to their prognosis, pattern diagnosis or  
18 349 treatment preference. More complex interventions, such as interventions for high-risk patients(34–  
19 350 41,43,45,46,48,56–58,60,62) and community-based spinal rehabilitation programmes(44,45,47–49,55),  
20 351 combine physical and psychological therapies, adding cognitive-behavioural approaches and support for  
21 352 long-term self-management. However, these are poorly described in the included studies.

22  
23 353 The majority of MoCs include a health intervention that may vary from a single session (for low-risk  
24 354 patients in stratified approaches according to prognosis profile) to several weeks of multifaceted  
25 355 rehabilitation programmes. However, not all models establish a specific duration for these interventions.  
26 356 Individualised treatments are the chosen format for healthcare delivery in most MoCs, except for Irish  
27 357 STarT Back(57). Group interventions appear to be a second treatment option in BetterBack©(40–43) and  
28 358 Low Back and Radicular Pain Pathway(44,45,47–49), when the main health intervention did not result in  
29 359 benefits for LBP patients.

30  
31 360 Other interventions, such pain medication prescription or review, were usually delivered by GP or other  
32 361 medical doctor in the initial consultation (STarT Back, TARGET, Low Back and Radicular Pain Pathway  
33 362 and SSP). None of the MoCs included occupational interventions or treatments focused on the adoption  
34 363 of healthy lifestyles.

35  
36 364

37  
38 365 *Follow-up and Discharge*

39  
40 366 Follow-up management and criteria for discharge were not well-defined in the included studies. When  
41 367 there are no improvements in the health condition, follow-ups may combine referral to additional group  
42 368 interventions, interface or secondary/tertiary care services. Irish(57) and Danish(58) STarT Back,  
43 369 TARGET(37–39) and BBPS(55) did not report how and when follow-ups are conducted.

44  
45 370 Concerning discharges, it seems they occur at the end of health interventions, but the reporting is not  
46 371 clear. In risk-stratified models, such as STarT Back, patients attend a pre-set number of appointments to  
47 372 receive treatments. However, it is poorly described if patients are discharged after this period, with 6  
48 373 MoCs not mentioning any criteria or timing. In TARGET(37–39), Low Back and Radicular Pain

1  
2  
3 374 Pathway(44,45,47–49) and North East Essex PCT service(51) patients can be discharged at any point  
4 375 along the pathway upon improvement of the LBP.

5  
6 376

## 7 8 9 377 **DISCUSSION**

10  
11 378 This study mapped the available evidence regarding the core characteristics and key elements of MoCs  
12 379 implemented in primary healthcare for the management of LBP. Eleven MoCs were found, all of them  
13 380 implemented in high-income countries with strong primary healthcare services, where general  
14 381 practitioners and physiotherapists serve as the main referrers. The majority of MoCs involve complex  
15 382 interventions delivered by physiotherapists, showing great variability in the reporting of core components,  
16 383 including unclear duration, follow-up and discharge criteria.

17  
18  
19  
20 384 Firstly, MoCs for LBP are in various stages of research and integration into health systems. While the  
21 385 Low Back Pain and Radicular Pain Pathway(44,45) is implemented nationwide, other MoCs are in trial  
22 386 phases regionally or locally. This reflects a growing emphasis on adopting MoCs for LBP, recognised for  
23 387 their potential to enhance care quality through evidence-based practices(63). However, given the  
24 388 inconsistent outcomes observed with these MoCs, they are not yet suitable for implementation beyond  
25 389 research environments.

26  
27  
28  
29 390 Recent studies show that LBP patients receiving treatments aligned with guidelines see better clinical  
30 391 outcomes and less healthcare usage(64). Although the reviewed MoCs align with these guidelines, only  
31 392 BetterBack©(40–43,65) has been assessed for its adherence to quality standards in care delivery. The  
32 393 reports suggest guideline-compliant designs, yet often lack detail on ensuring intended delivery of  
33 394 interventions. The gap between research findings and practical application in clinical settings  
34 395 remains(9,66), as the current evidence does not fully explore this transition. Future research should more  
35 396 thoroughly document care delivery assessment and monitoring processes.

36  
37  
38  
39  
40 397 Ten MoCs included stratified care approaches. Considering the successful implementation of the STarT  
41 398 Back(34) in UK on clinical and cost-effectiveness(34,35,46,56), adaptations of this MoC were developed  
42 399 to other countries. Recently, a systematic review found that a stratified care approach provides substantial  
43 400 clinical, economic and health related cost benefits in the medium and high-risk subgroups compared with  
44 401 usual care in short- and medium-term follow-ups(67). This may explain why MoCs tend to follow a  
45 402 stratified or hybrid approach to deliver care using the STarT Back Screening Tool. However, evidence  
46 403 shows that some adaptations of the MoC in other countries, such as in the USA, failed to show its clinical  
47 404 effectiveness. Moreover, despite there is no current evidence favouring stratified over stepped  
48 405 approaches for LBP management, the stepped care has demonstrated efficacy for other musculoskeletal  
49 406 conditions, such as osteoarthritis(25). The development of future MoCs may involve research on stepped  
50 407 care solutions as both strategies are endorsed by guidelines for treating LBP(11,13,68,69).

51  
52  
53  
54  
55  
56 408 This review found that many MoCs for managing LBP align with recommended practices, emphasising  
57 409 primary and community care as initial contact points(22) involving specialised health professionals, and  
58 410 focusing on education and exercise interventions(8,11–14). However, there was significant variability in  
59  
60

1  
2  
3 411 how health interventions were reported over time, with many studies lacking detailed documentation on  
4 412 follow-up procedures, discharge criteria, and specialised interventions across care levels. Accurate and  
5 413 detailed reporting of these interventions is essential for their replication and adaptation, critical for  
6 414 successful implementation in clinical settings.

7  
8  
9 415 MoCs aim to streamline and enhance healthcare efficiency through effective coordination across care  
10 416 sectors. Such coordination is key to delivering integrated, patient-centred care(17,22). Despite this  
11 417 emphasis, our review found that only a four(36–38,45,47,48,60,61) of the 11 MoCs provided clear details  
12 418 on achieving this coordination, often only mentioning clinical pathways and electronic health records. This  
13 419 gap suggests a potential underprioritisation of or challenges in implementing effective care integration,  
14 420 echoing broader findings of limited care integration for LBP patients between primary and secondary  
15 421 settings(27,70). Future research should focus on detailing strategies to improve healthcare provider  
16 422 collaboration, shared decision-making, and treatment plan adjustments to foster better care  
17 423 integration(71).

18 424 This review intended to inform clinicians and decision-makers on the current stage of MoCs  
19 425 implementation worldwide. We intend to continue this reflection through the synthesis of context-specific  
20 426 factors and outcomes used to evaluate the implementation of MoCs for LBP in primary healthcare. A  
21 427 subsequent paper will provide a comprehensive understanding of how implementation processes and  
22 428 strategies may have influenced outcomes.

23 429

### 24 430 **Strengths and Limitations**

25 431 The major strength include adherence to JBI recommendations(28,29,32), ensuring a robust and  
26 432 systematic methodology, right from protocol design to the presentation of results. Critical aspects such  
27 433 as the development of the search strategy, screening of records by two independent reviewers, and  
28 434 regular team discussions during data extraction and analysis were conducted under this guidance.  
29 435 However, the study also faced challenges such as potential evidence selection bias due to search  
30 436 strategies and language restrictions, possibly excluding some pertinent studies on MoCs. Variations in  
31 437 MoC terminologies in literature, the inclusive definition of MoC, and the ambiguity between specific  
32 438 evidence-based interventions and MoCs posed additional issues. Despite a focus on LBP-related MoCs,  
33 439 other relevant studies concerning spinal disorders may have been missed. To mitigate these issues, a  
34 440 broad and sensitive search strategy, an overinclusion approach during screening, several adjustments to  
35 441 the extraction form and regular reviewer discussions were employed. Yet, the diversity in MoC reporting  
36 442 possibly led to the omission of certain information, even though specific frameworks and a continuously  
37 443 adapted data form were utilised to tackle this challenge.

38 444

### 39 445 **Implications**

40 446 Throughout this process, it became evident that most of the MoCs implemented for LBP in primary  
41 447 healthcare are still under investigation and require further testing to produce robust estimates on their  
42 448 effectiveness, as well as guidance for optimal implementation. Future research should focus on

effectiveness-implementation studies with pragmatic designs to reproduce the challenges of implementing MoCs in real-world clinical settings, such as integration across care sectors and differences in funding models, context features and teams of healthcare providers(70).

Additionally, in line with the recommendations for conducting scoping reviews(28,29), a quality or risk of bias assessment was not performed in this study. Systematic reviews and meta-analyses are needed to assess the methodological quality of the studies and provide stronger conclusions on their findings. This knowledge may contribute to inform health policies, interventions and infrastructures favouring the implementation of a MoC that promote the delivery of high-quality care for LBP patients in the most efficient and sustainable way for health systems.

Finally, this scoping review sheds light on features shared by MoCs for LBP, offering a detailed insight into their foundations, content and resource requirements. However, the heterogeneity in reporting reveals the need for guidelines on the development and implementation of MoCs. This guidance will facilitate their transferability and adaptation to primary healthcare settings.

462

## 463 **CONCLUSION**

This study provides a broad overview of the key common elements of eleven MoCs implemented for LBP patients in primary healthcare worldwide. These MoCs are aligned with clinical practice guideline recommendations. Primary healthcare is the entry point for patients into the health system and they are offered stratified care approaches, based on education, exercise and manual therapy. More complex interventions or referral to secondary and tertiary care are feasible options when first approaches fail. However, most studies were very heterogeneous in reporting care coordination and its delivery over time. Additionally, most MoCs are not integrated into health systems and are still in the early stages of research. These findings highlight the need for guidelines to support the research, development and implementation of MoCs in real-world settings.

473

**Funding:** This project is supported by FCT – Fundação para a Ciência e a Tecnologia, I.P., under the PhD grant awarded to STD (UI/BD/150882/2021) and the MyBack project (PTDC/SAU-SER/7406/2020), in which EBC is the principal investigator.

**Competing Interests:** The authors declare no conflicts of interest.

**Acknowledgements:** The authors gratefully thank the late Professor Carla Nunes for considerable help and inspiration in the design and development of this study.

**Ethics Approval:** As this study involve a secondary analysis of previously published data, ethical approval is not required.

**Author contributions:** STD, EBC, PA and DC conceived the study. HD supported the formulation of search strategies and the literature search. Title and abstract screening were performed by STD and DC. Full-text screening and data extraction was carried out by STD and AM with the support of DC to solve

485 disagreements. Data analysis was performed by STD and discussed with EBC, PA and BH throughout  
 486 the process. STD drafted this manuscript. All authors revised and approved the final version of the  
 487 manuscript.

488 **Data sharing:** Not applicable as no datasets were generated for this study. All relevant data were included  
 489 in the article or as supplementary file. Additional data are not available.

490 **Figure 1.** PRISMA flow diagram showing the identification, screening, eligibility and inclusion process of  
 491 the articles.

492 **Figure 2.** Geographical representation of the MoCs (n=11) implemented for LBP in primary healthcare  
 493 worldwide.

494 **Figure 3.** Sunburst chart representing the different approaches of care delivered by the MoCs.

495

## 496 REFERENCES

- 497 1. GBD 2021 Low Back Pain Collaborators. Global, regional, and national burden of low back pain,  
 498 1990 – 2020, its attributable risk factors , and projections to 2050: a systematic analysis of the  
 499 Global Burden of Disease Study 2021. *Lancet Rheumatol.* 2023;5(June).
- 500 2. Wasiak R, Kim JY, Pransky G. Work disability and costs caused by recurrence of low back pain:  
 501 Longer and more costly than in first episodes. *Spine (Phila Pa 1976).* 2006;
- 502 3. Hartvigsen J, Hancock MJ, Kongsted A, Louw Q, Ferreira ML, Genevay S, et al. What low back  
 503 pain is and why we need to pay attention. *Lancet.* 2018;391(10137):2356–67.
- 504 4. Gouveia N, Canhão H, Branco JC. The Burden of Chronic Low Back Pain in the Adult  
 505 Portuguese Population: an Epidemiological Population-Based Study Under the Scope of  
 506 Epireumapt. Faculdade de Ciências Médicas da Universidade Nova de Lisboa; 2015.
- 507 5. Gouveia N, Rodrigues A, Eusébio M, Ramiro S, Machado P, Canhão H, et al. Prevalence and  
 508 social burden of active chronic low back pain in the adult Portuguese population: results from a  
 509 national survey. *Rheumatol Int.* 2016;36(2):183–97.
- 510 6. Lemmers GPG, van Lankveld W, Westert GP, van der Wees PJ, Staal JB. Imaging versus no  
 511 imaging for low back pain: a systematic review, measuring costs, healthcare utilization and  
 512 absence from work. *Eur Spine J [Internet].* 2019;28(5):937–50. Available from:  
 513 <https://doi.org/10.1007/s00586-019-05918-1>
- 514 7. Kim LH, Vail D, Azad TD, Bentley JP, Zhang Y, Ho AL, et al. Expenditures and Health Care  
 515 Utilization Among Adults With Newly Diagnosed Low Back and Lower Extremity Pain. *JAMA*  
 516 *Netw open.* 2019;2(5):e193676.
- 517 8. Oliveira CB, Maher CG, Pinto RZ, Traeger AC, Lin CWC, Chenot JF, et al. Clinical practice  
 518 guidelines for the management of non-specific low back pain in primary care: an updated  
 519 overview. *Eur Spine J [Internet].* 2018;27(11):2791–803. Available from:

- 1  
2  
3 520 <https://doi.org/10.1007/s00586-018-5673-2>  
4
- 5 521 9. Dzedzic KS, French S, Davis AM, Geelhoed E, Porcheret M. Implementation of musculoskeletal  
6 522 Models of Care in primary care settings: Theory, practice, evaluation and outcomes for  
7 523 musculoskeletal health in high-income economies. *Best Pract Res Clin Rheumatol* [Internet].  
8 524 2016;30(3):375–97. Available from: <http://dx.doi.org/10.1016/j.berh.2016.08.004>  
9  
10  
11 525 10. Beyera GK, O'Brien J, Campbell S. Health-care utilisation for low back pain: a systematic review  
12 526 and meta-analysis of population-based observational studies. *Rheumatol Int* [Internet].  
13 527 2019;39(10):1663–79. Available from: <https://doi.org/10.1007/s00296-019-04430-5>  
14  
15  
16 528 11. National Institute for Health and Care Excellence. Low back pain and sciatica in over 16s:  
17 529 assessment and management. Full guideline: Assessment and noninvasive treatments. Royal  
18 530 college of Physicians. 2016.  
19  
20  
21 531 12. Chenot JF, Greitemann B, Kladny B, Petzke F, Pflingsten M, Schorr SG. Clinical Practice  
22 532 Guideline: Non-specific low back pain. *Dtsch Arztebl Int*. 2017;114:883–90.  
23  
24 533 13. Qaseem A, Wilt TJ, McLean RM, Forcica MA. Noninvasive treatments for acute, subacute, and  
25 534 chronic low back pain: A clinical practice guideline from the American College of Physicians. *Ann*  
26 535 *Intern Med*. 2017;166(7):514–30.  
27  
28  
29 536 14. Lin I, Wiles L, Waller R, Goucke R, Nagree Y, Gibberd M, et al. What does best practice care for  
30 537 musculoskeletal pain look like? Eleven consistent recommendations from high-quality clinical  
31 538 practice guidelines: Systematic review. *Br J Sports Med*. 2019;1–10.  
32  
33  
34 539 15. Buchbinder R, Underwood M, Hartvigsen J, Maher CG. The Lancet Series call to action to  
35 540 reduce low value care for low back pain: an update. *Pain*. 2020;161(9):S57–64.  
36  
37 541 16. Powell AC, Rogstad TL, Elliott SW, Price SE, Long JW, Deshmukh UU, et al. Health care  
38 542 utilization and pain outcomes following early imaging for low back pain in older adults. *J Am*  
39 543 *Board Fam Med*. 2019;32(6):773–80.  
40  
41  
42 544 17. Speerin R, Needs C, Chua J, Woodhouse LJ, Nordin M, Mcglasson R, et al. Implementing  
43 545 models of care for musculoskeletal conditions in health systems to support value-based care.  
44 546 *Best Pract Res Clin Rheumatol* [Internet]. 2020;34(5). Available from:  
45 547 <https://doi.org/10.1016/j.berh.2020.101548>  
46  
47  
48 548 18. Foster NE, Anema JR, Cherkin D, Chou R, Cohen SP, Gross DP, et al. Prevention and  
49 549 treatment of low back pain: evidence, challenges, and promising directions. *Lancet*.  
50 550 2018;391(10137):2368–83.  
51  
52  
53 551 19. Hall AM, Scurry SR, Pike AE, Albury C, Richmond HL, Matthews J, et al. Physician-reported  
54 552 barriers to using evidence-based recommendations for low back pain in clinical practice: A  
55 553 systematic review and synthesis of qualitative studies using the Theoretical Domains  
56 554 Framework. *Implement Sci*. 2019;14(1):1–19.  
57  
58  
59 555 20. Traeger AC, Buchbinder R, Elshaug AG, Croft PR, Maher CG. Care for low back pain: can  
60

- 1  
2  
3 556 health systems deliver? *Bull World Health Organ* [Internet]. 2019;97(6):423–33. Available from:  
4 557 <http://www.who.int/entity/bulletin/volumes/97/6/18-226050.pdf>
- 6 558 21. Briggs AM, Chan M, Slater H. Models of Care for musculoskeletal health: Moving towards  
7 559 meaningful implementation and evaluation across conditions and care settings. *Best Pract Res*  
8 560 *Clin Rheumatol* [Internet]. 2016;30(3):359–74. Available from:  
9 561 <http://dx.doi.org/10.1016/j.berh.2016.09.009>
- 12 562 22. Briggs AM, Jordan JE, Jennings M, Speerin R, Chua J, Bragge P, et al. A Framework to  
13 563 Evaluate Musculoskeletal Models of Care [Internet]. Cornwall, UK; 2016. Available from:  
14 564 <http://bjdonline.org/a-framework-to-evaluate-musculoskeletal-models-of-care/>
- 17 565 23. Speerin R, Slater H, Li L, Moore K, Chan M, Dreinhofer K, et al. Moving from evidence to  
18 566 practice: Models of care for the prevention and management of musculoskeletal conditions. *Best*  
19 567 *Pr Res Clin Rheumatol*. 2014;28(3):479–515.
- 22 568 24. Chehade MJ, Yadav L, Kopansky-Giles D, Merolli M, Palmer E, Jayatilaka A, et al. Innovations  
23 569 to improve access to musculoskeletal care. *Best Pract Res Clin Rheumatol* [Internet].  
24 570 2020;(xxxx):101559. Available from: <https://doi.org/10.1016/j.berh.2020.101559>
- 27 571 25. Kongsted A, Kent P, Quicke JG, Skou ST, Hill JC. Risk-stratified and stepped models of care for  
28 572 back pain and osteoarthritis: are we heading towards a common model? *PAIN Reports*.  
29 573 2020;5(5):e843.
- 32 574 26. Costa N, Blyth FM, Amorim AB, Parambath S, Shanmuganathan S, Huckel Schneider C.  
33 575 Implementation Initiatives to Improve Low Back Pain Care in Australia: A Scoping Review. *Pain*  
34 576 *Med (United States)*. 2022;23(12):1979–2009.
- 37 577 27. Murphy C, French H, McCarthy G, Cunningham C. Clinical pathways for the management of low  
38 578 back pain from primary to specialised care: a systematic review. *Eur Spine J*. 2022;31(7):1846–  
39 579 65.
- 41 580 28. Pollock D, Peters MDJ, Khalil H, McInerney P, Alexander L, Tricco AC, et al. Recommendations  
42 581 for the extraction, analysis, and presentation of results in scoping reviews. *JB Evid Synth*.  
43 582 2023;21(3):520–32.
- 46 583 29. Peters MDJ, Godfrey C, McInerney P, Khalil H, Larsen P, Marnie C, et al. Best practice guidance  
47 584 and reporting items for the development of scoping review protocols. *JB Evid Synth*.  
48 585 2022;20(4):953–68.
- 51 586 30. Duarte ST, Nunes C, Costa D, Donato H, Cruz EB. Models of care for low back pain patients in  
52 587 primary healthcare: a scoping review protocol. *BMJ Open*. 2022;12(4).
- 54 588 31. WHO. Operational Framework for Primary Health Care [Internet]. World Health Organization.  
55 589 2020. 1–132 p. Available from: <https://www.who.int/publications/i/item/9789240017832>
- 58 590 32. Peters MD, Godfrey C, McInerney P, Munn Z, Tricco AC, Khalil H. Chapter 11: Scoping  
59 591 Reviews. In: Aromataris E, Munn Z, editors. *JB Manual for Evidence Synthesis*. 2021.

- 1  
2  
3 592 33. Elo S, Kyngäs H. The qualitative content analysis process. *J Adv Nurs*. 2008;62(1):107–15.  
4  
5 593 34. Hill JC, Whitehurst DGT, Lewis M, Bryan S, Dunn KM, Foster NE, et al. Comparison of stratified  
6 594 primary care management for low back pain with current best practice (STarT Back): A  
7 595 randomised controlled trial. *Lancet [Internet]*. 2011;378(9802):1560–71. Available from:  
8 596 [http://dx.doi.org/10.1016/S0140-6736\(11\)60937-9](http://dx.doi.org/10.1016/S0140-6736(11)60937-9)  
9  
10  
11 597 35. Whitehurst DGTT, Bryan S, Lewis M, Hill J, Hay EM. Exploring the cost-utility of stratified  
12 598 primary care management for low back pain compared with current best practice within risk-  
13 599 defined subgroups. *Ann Rheum Dis*. 2012 Nov;71(11):1796–802.  
14  
15  
16 600 36. Hsu C, Evers S, Balderson BH, Sherman KJ, Foster NE, Estlin K, et al. Adaptation and  
17 601 implementation of the start back risk stratification strategy in a US health care organization: A  
18 602 process evaluation. *Pain Med (United States)*. 2019 Jun;20(6):1105–19.  
19  
20  
21 603 37. Beneciuk JM, George SZ, Greco CM, Schneider MJ, Wegener ST, Saper RB, et al. Targeted  
22 604 interventions to prevent transitioning from acute to chronic low back pain in high-risk patients:  
23 605 development and delivery of a pragmatic training course of psychologically informed physical  
24 606 therapy for the TARGET trial. *Trials*. 2019 May;20(1):256.  
25  
26  
27 607 38. Middleton A, Fitzgerald GK, Delitto A, Saper RB, Gergen Barnett K, Stevans J. Implementing  
28 608 stratified care for acute low back pain in primary care using the STarT Back instrument: a  
29 609 process evaluation within the context of a large pragmatic cluster randomized trial. *BMC*  
30 610 *Musculoskelet Disord*. 2020 Dec;21(1).  
31  
32  
33 611 39. Delitto A, Patterson CG, Stevans JM, Freburger JK, Khoja SS, Schneider MJ, et al. Stratified  
34 612 care to prevent chronic low back pain in high-risk patients: the TARGET trial. A multi-site  
35 613 pragmatic cluster randomized trial. *Eclinicalmedicine*. 2021;34.  
36  
37  
38 614 40. Schröder K, Öberg B, Enthoven P, Kongsted A, Abbott A. Confidence, attitudes, beliefs and  
39 615 determinants of implementation behaviours among physiotherapists towards clinical  
40 616 management of low back pain before and after implementation of the BetterBack model of care.  
41 617 *BMC Health Serv Res*. 2020;20(1):1–14.  
42  
43  
44 618 41. Enthoven P, Eddeborn F, Abbott A, Schroder K, Fors M, Oberg B. Patients' experiences of the  
45 619 BetterBack model of care for low back pain in primary care - a qualitative interview study. *Int J*  
46 620 *Qual Stud Health Well-being*. 2021;16(1).  
47  
48  
49 621 42. Schröder K, Öberg B, Enthoven P, Hedevid H, Fors M, Abbott A. Effectiveness and Quality of  
50 622 Implementing a Best Practice Model of Care for Low Back Pain (BetterBack) Compared with  
51 623 Routine Care in Physiotherapy: A Hybrid Type 2 Trial. *J Clin Med*. 2021;10(6):1230.  
52  
53  
54 624 43. Schröder K, Öberg B, Enthoven P, Hedevid H, Abbott A. Improved adherence to clinical  
55 625 guidelines for low back pain after implementation of the BetterBack model of care: A stepped  
56 626 cluster randomized controlled trial within a hybrid type 2 trial. *Physiother Theory Pract*. 2022  
57 627 Mar;1–15.  
58  
59  
60



- 1  
2  
3 628 44. Greenhough C. National Back Pain and Radicular Pain Pathway 2017 - Including  
4 629 Implementation of NICE Guidance NG59. Trauma Program Care NHS Engl. 2017;(June).  
5  
6 630 45. Ryan C, Pope CJ, Roberts L. Why managing sciatica is difficult: patients' experiences of an NHS  
7 631 sciatica pathway. A qualitative, interpretative study. *BMJ Open*. 2020;10(6):e037157.  
8  
9 632 46. Foster NE, Mullis R, Hill JC, Lewis M, Whitehurst DG, Doyle C, et al. Effect of stratified care for  
10 633 low back pain in family practice (IMPACT Back): a prospective population-based sequential  
11 634 comparison. *Ann Fam Med*. 2014;12(2):102–11.  
12  
13 635 47. Martin D, Ryan C, Wellburn S, Hamilton S, Jess MA. The North of England Regional Back Pain  
14 636 and Radicular Pain Pathway: Evaluation. 2018;(February):1–26.  
15  
16 637 48. Jess MA, Ryan C, Hamilton S, Wellburn S, Atkinson G, Greenough C, et al. Does duration of  
17 638 pain at baseline influence clinical outcomes of low back pain patients managed on an evidence-  
18 639 based pathway? *Spine (Phila Pa 1976)*. 2018;43(17):E998–1004.  
19  
20 640 49. Jess MA, Ryan C, Hamilton S, Wellburn S, Atkinson G, Greenough C, et al. Does Duration of  
21 641 Pain at Baseline Influence Longer-term Clinical Outcomes of Low Back Pain Patients Managed  
22 642 on an Evidence-Based Pathway? *Spine (Phila Pa 1976)*. 2021;46(3):191–7.  
23  
24 643 50. Cheshire A, Polley M, Peters D, Ridge D. Patient outcomes and experiences of an acupuncture  
25 644 and self-care service for persistent low back pain in the NHS: A mixed methods approach. *BMC*  
26 645 *Complement Altern Med*. 2013;13(1):1.  
27  
28 646 51. Gurden M, Morelli M, Sharp G, Baker K, Betts N, Bolton J. Evaluation of a general practitioner  
29 647 referral service for manual treatment of back and neck pain. *Prim Health Care Res Dev*.  
30 648 2012;13(3):204–10.  
31  
32 649 52. Zarrabian M, Bidos A, Fanti C, Young B, Drew B, Puskas D, et al. Improving spine surgical  
33 650 access, appropriateness and efficiency in metropolitan, urban and rural settings. *Can J Surg*.  
34 651 2017;60(5):342–8.  
35  
36 652 53. Kindrachuk DR, Fourney DR. Spine surgery referrals redirected through a multidisciplinary care  
37 653 pathway: effects of nonsurgeon triage including MRI utilization. *J Neurosurg Spine*.  
38 654 2013;20(1):87–92.  
39  
40 655 54. Wilgenbusch CS, Wu AS, Fourney DR. Triage of spine surgery referrals through a  
41 656 multidisciplinary care pathway: A value-based comparison with conventional referral processes.  
42 657 *Spine (Phila Pa 1976)*. 2014;39(22):S129–35.  
43  
44 658 55. Moi JHY, Phan U, de Gruchy A, Liew D, Yuen TI, Cunningham JE, et al. Is establishing a  
45 659 specialist back pain assessment and management service in primary care a safe and effective  
46 660 model? Twelve-month results from the Back pain Assessment Clinic (BAC) prospective cohort  
47 661 pilot study. *BMJ Open*. 2018 Oct;8(10).  
48  
49 662 56. Whitehurst DGT, Bryan S, Lewis M, Hay EM, Mullis R, Foster NE. Implementing stratified  
50 663 primary care management for low back pain: Cost-utility analysis alongside a prospective,

- 1  
2  
3 664 population-based, sequential comparison study. *Spine (Phila Pa 1976)*. 2015;40(6):405–14.  
4  
5 665 57. Murphy SE, Blake C, Power CK, Fullen BM. Comparison of a Stratified Group Intervention  
6 666 (STarT Back) with Usual Group Care in Patients with Low Back Pain: A Nonrandomized  
7 667 Controlled Trial. *Spine (Phila Pa 1976)*. 2016;41(8):645–52.  
8  
9  
10 668 58. Morsø L, Olsen Rose K, Schiøttz-Christensen B, Sowden G, Søndergaard J, Christiansen DH.  
11 669 Effectiveness of stratified treatment for back pain in Danish primary care: A randomized  
12 670 controlled trial. *Eur J Pain (United Kingdom)*. 2021;25(9):2020–38.  
13  
14 671 59. Saunders B, Konstantinou K, Artus M, Foster NE, Bartlam B. Patients' and clinicians'  
15 672 perspectives on a "fast-track" pathway for patients with sciatica in primary care: Qualitative  
16 673 findings from the SCOPiC stratified care trial. *BMC Musculoskelet Disord*. 2020;21(1).  
17  
18  
19 674 60. Konstantinou K, Lewis M, Dunn K, Ogollah R, Artus M, Hill J, et al. Stratified care versus usual  
20 675 care for management of patients presenting with sciatica in primary care (SCOPiC): a  
21 676 randomised controlled trial [with consumer summary]. *Lancet Rheumatol* 2020 Jul;2(7)e401-  
22 677 e411. 2020;  
23  
24  
25 678 61. Foster NE, Konstantinou K, Lewis M, Ogollah R, Saunders B, Kigozi J, et al. Stratified versus  
26 679 usual care for the management of primary care patients with sciatica: The scopic RCT. *Health*  
27 680 *Technol Assess (Rockv)*. 2020 Oct;24(49):1–160.  
28  
29  
30 681 62. Cherkin D, Balderson B, Wellman R, Hsu C, Sherman KJ, Evers SC, et al. Effect of Low Back  
31 682 Pain Risk-Stratification Strategy on Patient Outcomes and Care Processes: the MATCH  
32 683 Randomized Trial in Primary Care. *J Gen Intern Med*. 2018;33(8):1324–36.  
33  
34  
35 684 63. Buchbinder R, van Tulder M, Öberg B, Costa LM, Woolf A, Schoene M, et al. Low back pain: a  
36 685 call for action. *Lancet*. 2018;391(10137):2384–8.  
37  
38  
39 686 64. Hanney WJ, Masaracchio M, Liu X, Kolber MJ. The influence of physical therapy guideline  
40 687 adherence on healthcare utilization and costs among patients with low back pain: A systematic  
41 688 review of the literature. *PLoS One*. 2016;11(6):1–18.  
42  
43  
44 689 65. Schröder K. Implementing BetterBack – a Best Practice Physiotherapy Healthcare Model for  
45 690 Low Back Pain Clinician and Patient Evaluation. Linköping University Medical Dissertations.  
46 691 2021.  
47  
48  
49 692 66. Lau R, Stevenson F, Ong BN, Dziedzic K, Treweek S, Eldridge S, et al. Achieving change in  
50 693 primary care-causes of the evidence to practice gap: Systematic reviews of reviews. *Implement*  
51 694 *Sci [Internet]*. 2016;11(1). Available from: <http://dx.doi.org/10.1186/s13012-016-0396-4>  
52  
53 695 67. Ogbeivor C, Elsabbagh L. Management approach combining prognostic screening and targeted  
54 696 treatment for patients with low back pain compared with standard physiotherapy: A systematic  
55 697 review & meta-analysis. *Musculoskeletal Care*. 2021;(January).  
56  
57  
58 698 68. Agency for Clinical Innovation. Management of people with acute low back pain - Model of care.  
59 699 Vol. 58, *La Revue du praticien*. 2016.  
60

- 1  
2  
3 700 69. Wambeke P, Desomer A, Ailliet L, Demoulin C. Low Back Pain and Radicular Pain: Assessment  
4 701 and Management 2017. 2017;  
5  
6 702 70. Coeckelberghs E, Verbeke H, Desomer A, Jonckheer P, Fournay D, Willems P, et al.  
7 703 International comparative study of low back pain care pathways and analysis of key  
8 704 interventions. Eur Spine J [Internet]. 2021;30(4):1043–52. Available from:  
9 705 <https://doi.org/10.1007/s00586-020-06675-2>  
10  
11  
12 706 71. Schultz EM, McDonald KM. What is care coordination? Int J Care Coord. 2014;17(1–2):5–24.  
13  
14  
15  
16  
17  
18  
19  
20  
21  
22  
23  
24  
25  
26  
27  
28  
29  
30  
31  
32  
33  
34  
35  
36  
37  
38  
39  
40  
41  
42  
43  
44  
45  
46  
47  
48  
49  
50  
51  
52  
53  
54  
55  
56  
57  
58  
59  
60

For peer review only

708 **Table 1. MoCs identification and corresponding studies**

| MoC designation                                                                                             | Country          | Study                          | Objective                                                                                                                                                                                                                                                | Type of study                      |
|-------------------------------------------------------------------------------------------------------------|------------------|--------------------------------|----------------------------------------------------------------------------------------------------------------------------------------------------------------------------------------------------------------------------------------------------------|------------------------------------|
| <b>START BACK<br/>Subgroups for<br/>Targeted Treatment</b>                                                  | UK               | Hill et al. (2011)(34)         | To compare the clinical effectiveness and cost-effectiveness of stratified primary care with non-stratified current best practice (STarT Back trial)                                                                                                     | RCT                                |
|                                                                                                             |                  | Whitehurst et al. (2012)(35)   | To determine the economic implications of providing stratified care compared with non-stratified current best practice for each specific risk-defined subgroup (STarT Back trial)                                                                        | RCT (cost-utility)                 |
|                                                                                                             |                  | Foster et al. (2014)(46)       | To determine the effects of implementing risk-stratified in family practice on physician's clinical behaviour, patient outcomes and costs (IMPACT Back trial)                                                                                            | Observational cohort, before-after |
|                                                                                                             |                  | Whitehurst et al. (2015)(56)   | To explore the cost-utility of implementing stratified care in general practice, compared with usual care, within risk-defined patient subgroups (IMPACT Back trial)                                                                                     | RCT (cost-utility)                 |
|                                                                                                             | Ireland          | Murphy et al. (2016)(57)       | To explore the effectiveness of group-based (high-risk group) stratified care in primary care                                                                                                                                                            | Nonrandomised controlled trial     |
| <b>SCOPIC<br/>SCiatica Outcomes in<br/>Primary Care</b>                                                     | UK               | Morsø et al. (2021)(58)        | To evaluate the clinical efficacy and cost-effectiveness of stratified care compared with current practice in Danish primary care                                                                                                                        | RCT                                |
|                                                                                                             |                  | Saunders et al. (2020)(59)     | To explore patients' and clinicians' perspectives on the acceptability of the 'fast-track' pathway                                                                                                                                                       | Qualitative                        |
|                                                                                                             |                  | Konstantinou et al. (2020)(60) | To investigate the clinical and cost-effectiveness of stratified care versus non-stratified usual care for patients presenting with sciatica in primary care                                                                                             | RCT                                |
| <b>MATCH<br/>Matching Appropriate<br/>Treatment to<br/>Consumers'<br/>Healthcare needs</b>                  | USA              | Foster et al. (2020)(61)       | To compare the clinical effectiveness and cost-effectiveness of the SCOPIC care versus non-SCOPIC care in primary care                                                                                                                                   | Mixed methods                      |
|                                                                                                             |                  | Cherkin et al. (2018)(62)      | To evaluate the effect of implementing an adaptation of the STarT Back strategy in a US primary care setting                                                                                                                                             | Cluster RCT                        |
| <b>TARGET<br/>Targeted Interventions<br/>to Prevent Chronic<br/>Low Back Pain in<br/>High-Risk Patients</b> | USA              | Hsu et al. (2019)(36)          | To describe the implementation strategies and uptake of an intervention that incorporated the STarT Back stratified care model into several primary care clinics                                                                                         | Qualitative                        |
|                                                                                                             |                  | Beneciuk et al. (2019)(37)     | To describe the training developed and delivered to prepare PTs for providing treatment in the TARGET trial                                                                                                                                              | Qualitative                        |
|                                                                                                             |                  | Middleton et al. (2020)(38)    | To examine variation in risk stratification and referral of high-risk patients to psychologically informed physical therapy; and to identify barriers and facilitators related to the risk stratification and referral processes.                        | Mixed methods                      |
| <b>BETTERBACK® Model<br/>of Care</b>                                                                        | Sweden           | Delitto et al. (2021)(39)      | To test if implementation of a risk-stratified approach to care would result in lower rates of chronic LBP and improved self-reported disability; and if the stratified approach supplemented with referral to PIPT is superior to stratified care alone | Cluster RCT                        |
|                                                                                                             |                  | Schröder et al. (2020)(40)     | To evaluate PTs' confidence, attitudes and beliefs in managing patients before and after a multifaceted implementation of the BetterBack® and to evaluate determinants of implementation behaviours among PTs                                            | Observational cohort, before-after |
|                                                                                                             |                  | Enthoven et al. (2021)(41)     | To describe patient experiences of received primary care according to the BetterBack® in primary care                                                                                                                                                    | Qualitative                        |
|                                                                                                             |                  | Schröder et al. (2021)(42)     | To evaluate the effectiveness and a sustained multifaceted implementation strategy of the BetterBack® compared to routine PT care; To compare patient outcomes based on the fidelity of clinical practice quality index adherence regarding PT care.     | Cluster RCT                        |
| <b>Low Back and<br/>Radicular Pain</b>                                                                      | UK<br>(National) | Schröder et al. (2022)(43)     | To evaluate if PT' adherence to clinical practice guideline recommendations improves after a multifaceted implementation of the BetterBack®                                                                                                              | Cluster RCT                        |
|                                                                                                             |                  | Greenough (2017)(44)           | To produce and use a generic pathway for the management of LBP and radicular pain in adults, from the general practitioner's surgery to specialised care                                                                                                 | Report (grey literature)           |

|    |                                                                          |                          |                                                                                                                                                                 |                                                                                                                                                                                                       |                                     |
|----|--------------------------------------------------------------------------|--------------------------|-----------------------------------------------------------------------------------------------------------------------------------------------------------------|-------------------------------------------------------------------------------------------------------------------------------------------------------------------------------------------------------|-------------------------------------|
| 1  |                                                                          |                          |                                                                                                                                                                 |                                                                                                                                                                                                       |                                     |
| 2  |                                                                          |                          |                                                                                                                                                                 |                                                                                                                                                                                                       |                                     |
| 3  | <b>Pathway</b>                                                           | Ryan et al. (2020)(45)   | To explore how people experience being managed for sciatica within a National Health Service pathway                                                            | Qualitative                                                                                                                                                                                           |                                     |
| 4  |                                                                          |                          |                                                                                                                                                                 |                                                                                                                                                                                                       |                                     |
| 5  | UK (North)                                                               | Martin et al. (2018)(47) | To evaluate what changes are seen in patient outcomes and experiences, and in the performance of the health service following the implementation of the pathway | Mixed methods (grey literature)                                                                                                                                                                       |                                     |
| 6  |                                                                          |                          |                                                                                                                                                                 |                                                                                                                                                                                                       |                                     |
| 7  | UK (North East)                                                          | Jess et al. (2018)(48)   | To investigate the association between the duration of pain at baseline and the clinical outcomes of patients with LBP enrolled on NERBPP                       | Observational cohort                                                                                                                                                                                  |                                     |
| 8  |                                                                          | Jess et al. (2021)(49)   | To evaluate the association between baseline pain duration and medium-to-long term clinical outcomes in LBP patients enrolled on the NERBPP                     | Observational cohort                                                                                                                                                                                  |                                     |
| 9  | <b>Beating Back Pain Service (BBPS)</b>                                  | UK                       | Cheshire et al. (2013)(50)                                                                                                                                      | To report patient outcomes and experiences of the BBPS                                                                                                                                                | Mixed methods                       |
| 10 |                                                                          |                          |                                                                                                                                                                 |                                                                                                                                                                                                       |                                     |
| 11 | <b>North East Essex Primary Care Trust manual therapy service</b>        | UK                       | Gurden et al. (2012)(51)                                                                                                                                        | To describe and evaluate a community-based musculoskeletal service in terms of patient-reported outcomes and satisfaction                                                                             | Observational cohort                |
| 12 |                                                                          |                          |                                                                                                                                                                 |                                                                                                                                                                                                       |                                     |
| 13 |                                                                          |                          |                                                                                                                                                                 |                                                                                                                                                                                                       |                                     |
| 14 | <b>Inter-professional Spine Assessment and Education Clinics (ISAEC)</b> | Canada                   | Zarrabian et al. (2017)(52)                                                                                                                                     | To determine the effect of ISAEC on access for surgical assessment, referral appropriateness and efficiency for patients meeting a priori referral criteria in rural, urban and metropolitan settings | Observational cohort                |
| 15 |                                                                          |                          |                                                                                                                                                                 |                                                                                                                                                                                                       |                                     |
| 16 |                                                                          |                          |                                                                                                                                                                 |                                                                                                                                                                                                       |                                     |
| 17 |                                                                          |                          |                                                                                                                                                                 |                                                                                                                                                                                                       |                                     |
| 18 | <b>Saskatchewan Spine Pathway (SSP)</b>                                  | Canada                   | Kindrachuk & Fourney (2014)(53)                                                                                                                                 | To determine how the SSP pathway affects utilisation of MRI and spine surgery                                                                                                                         | Retrospective study, registry-based |
| 19 |                                                                          |                          |                                                                                                                                                                 |                                                                                                                                                                                                       |                                     |
| 20 |                                                                          |                          |                                                                                                                                                                 |                                                                                                                                                                                                       |                                     |
| 21 |                                                                          |                          |                                                                                                                                                                 |                                                                                                                                                                                                       |                                     |
| 22 | <b>Back Pain Assessment Clinic (BAC)</b>                                 | Australia                | Moi et al. (2018)(55)                                                                                                                                           | To report on the design, implementation and evaluation of the safety and effectiveness of the BAC model                                                                                               | Observational cohort pilot study    |
| 23 |                                                                          |                          |                                                                                                                                                                 |                                                                                                                                                                                                       |                                     |

**Abbreviations:**

BAC – Back pain Assessment Clinic; BBPS – Beating Back Pain Service (BBPS); ISAEC – Inter-professional Spine Assessment and Education Clinics; LBP – Low Back Pain; MoC – Model of Care; MRI – Magnetic Resonance Imaging; NERBPP – North East Low Back and Radicular Pain Pathway; PTs – Physiotherapists; RCT – Randomised controlled trial; SCOPiC - Sciatica Outcomes in Primary Care; SSP – Saskatchewan Spine Pathway;

709

710

711

712

713

714

715

716 Table 2. General characteristics of the MoCs

| MoC                     | Study               | MoC Goals                                                                                                                                                              | Population                               | Type of care                                    | Settings                                                                                                     | Health professionals                                              | Context                                                                                                                                                                                                                                                                                                                                            |
|-------------------------|---------------------|------------------------------------------------------------------------------------------------------------------------------------------------------------------------|------------------------------------------|-------------------------------------------------|--------------------------------------------------------------------------------------------------------------|-------------------------------------------------------------------|----------------------------------------------------------------------------------------------------------------------------------------------------------------------------------------------------------------------------------------------------------------------------------------------------------------------------------------------------|
| START BACK              | STarT Back (34,35)  | Implement stratified care; Promote EBP and/or guideline-concordant care; Improve care effectiveness; Reduce costs; Optimise referral behaviour for care and/or imaging | LBP, radiculopathy                       | Stratified (by prognosis)                       | PHC (general practices and PT-led back pain clinic)                                                          | GPs, nurses and PTs                                               | NHS (Primary Care Trusts); General practices within the Keele GP Research Partnership (network of practices); Clinical manifestation of the guidelines of the Royal College of General Practitioners (1996), Working Group on Guidelines for the Management of Acute LBP in Primary Care (2006) and Arthritis and Musculoskeletal Alliance (2004). |
|                         | IMPaCT Back (46,56) |                                                                                                                                                                        |                                          |                                                 | PHC (general practices and community-based PT practices)                                                     | GPs and PTs                                                       | NHS (Primary Care Trusts); Clinical manifestation of the NICE guidelines (2009)                                                                                                                                                                                                                                                                    |
|                         | Ireland (57)        | Implement stratified care; Improve care effectiveness; Promote EBP and/or guideline-concordant care; Reduce healthcare resources use                                   | LBP, radicular pain                      | Stratified (by prognosis)                       | PHC (PT-led spinal triage clinic - Back Pain Clinic)                                                         | GPs and PTs                                                       | NHS (Waterford City Primary Care); Clinical manifestation of the NICE guidelines for LBP (2009)                                                                                                                                                                                                                                                    |
|                         | Denmark (58)        | Implement stratified care; Improve care effectiveness; Promote EBP and/or guideline-concordant care; Reduce costs; Optimise referral behaviour for care and/or imaging | LBP, radicular pain                      | Stratified (by prognosis)                       | PHC (general practices and PT clinics)                                                                       | GPs and PTs                                                       | PHC from different geographical areas of the Regions of Southern and Central Denmark.                                                                                                                                                                                                                                                              |
| SCOPIC                  | (59-61)             | Reduce wait times for imaging and/or specialist review; Promote EBP and/or guideline-concordant care; Improve care effectiveness; Implement stratified care            | LBP, radicular pain (suspected sciatica) | Stratified (by prognosis and pattern diagnosis) | PHC (general practices, community PT services), primary/secondary care interface services and secondary care | GPs, PTs, spinal specialist PTs and spinal surgeons               | NHS (Trusts); General practices localised in a mix of urban, inner city, semi-rural and rural areas; Spinal specialist services include specialist clinics at the primary/secondary care interface, spinal orthopaedic and pain clinic teams (treatments offered are part of NHS care).                                                            |
| MATCH                   | (36,62)             | Implement stratified care; Improve care effectiveness; Reduce healthcare utilisation; Optimise referral behaviour for care and/or imaging                              | LBP                                      | Stratified (by prognosis)                       | PHC (clinics with onsite PT departments)                                                                     | Medical doctors, physician assistants/nurse practitioners and PTs | Integrated healthcare delivery system (Group Health); Adaptation of the STarT Back approach: major differences concern the delivery of care, which follows the Group Health treatment guidelines.                                                                                                                                                  |
| TARGET                  | (37-39)             | Implement stratified care; Improve care effectiveness; Reduce healthcare resources use; Optimise referral behaviour for care and/or imaging                            | LBP                                      | Stratified (by prognosis)                       | PHC (clinics)                                                                                                | PHC physicians and PTs                                            | Five health care systems (University of Pittsburgh Medical Center, Boston Medical Center, Johns Hopkins Medicine, Intermountain Health, Medical University of South Carolina) - network of PHC clinics in both urban and rural environments; MoC directed to manage high-risk patients (according to SBST stratification).                         |
| BETTERBACK <sup>®</sup> | (40-43)             | Promote EBP and/or guideline-concordant care; Improve care effectiveness; Promote integrated care                                                                      | LBP, radiculopathy                       | Hybrid - Stratified/stepped                     | PHC (PT clinics)                                                                                             | PTs                                                               | Adaptation of best practice clinical guidelines developed by the Danish Health and Medicines Authority (2016) and the English NICE (2016) to the Swedish context                                                                                                                                                                                   |

|                                     |                    |                                                                                                                                                                                                                                                                             |                     |                                                     |                                                                                 |                                                                                                               |                                                                                                                                                                                                                                                                                    |
|-------------------------------------|--------------------|-----------------------------------------------------------------------------------------------------------------------------------------------------------------------------------------------------------------------------------------------------------------------------|---------------------|-----------------------------------------------------|---------------------------------------------------------------------------------|---------------------------------------------------------------------------------------------------------------|------------------------------------------------------------------------------------------------------------------------------------------------------------------------------------------------------------------------------------------------------------------------------------|
| Low Back and Radicular Pain Pathway | National (44,45)   | Improve care effectiveness; Promote timely and/or equitable access to care; Promote EBP and/or guideline-concordant care; Promote integrated care; Reduce wait times for care, imaging and/or specialist review; Optimise referral behaviour for care and/or imaging        | LBP, radicular pain | Hybrid – Stratified/stepped                         | PHC, Community Services, Secondary Care and Specialist Pain Management Services | GPs, PTs, chiropractors, osteopaths, pharmacists, TTPs, specialist spinal surgeon, multidisciplinary staffing | NHS; The implementation of the National Pathway is a decision of the Clinical Commissioning Groups, considering services and provision within their commissioning area; TTPs play a core role in the pathway.                                                                      |
|                                     | North(47)          |                                                                                                                                                                                                                                                                             |                     | Not reported                                        | PHC (outpatient PT service)                                                     | GPs and TTPs (specialised nurses and PTs)                                                                     | NHS (Community Trust); Part of the national pathway (UK Low Back and Radicular Pain Pathway); Clinical manifestation of the NICE guidelines for LBP (2009)                                                                                                                         |
|                                     | North East (48,49) |                                                                                                                                                                                                                                                                             |                     | Hybrid – Stratified/stepped                         | PHC, primary/secondary care interface services and secondary care               |                                                                                                               | Clinical manifestation of the NICE guidelines for LBP (2009)                                                                                                                                                                                                                       |
| Beating Back Pain Service           | (50)               | Promote EBP and/or guideline-concordant care; Reduce wait times for care, imaging and/or specialist review                                                                                                                                                                  | LBP                 | Hybrid - Stepped/Stratified (by patient preference) | PHC and community care                                                          | GPs, occupational therapists, acupuncturists, psychotherapists                                                | NHS (Primary Care Trust); Clinical manifestation of the NICE guidelines for LBP (2009)                                                                                                                                                                                             |
| North East Essex PCT service        | (51)               | Improve care effectiveness; Promote timely and/or equitable access to care; Reduce wait times for care, imaging and/or specialist review; Optimise referral behaviour for care and/or imaging; Reduce healthcare resources use                                              | Back or neck pain   | Hybrid - Stepped/Stratified (by patient preference) | PHC and community care (chiropractic, osteopathic and PT clinics)               | GPs, chiropractors, osteopaths and PTs                                                                        | NHS (North East Essex Primary Care Trust); Clinical manifestation of the NICE guidelines for LBP (2009)                                                                                                                                                                            |
| ISAEC                               | (52)               | Promote EBP and/or guideline-concordant care; Reduce wait times for care, imaging and/or specialist review; Optimise referral behaviour for care and/or imaging; Promote integrated care                                                                                    | LBP                 | Stratified (by pattern diagnosis)                   | PHC and ISAEC clinics                                                           | Doctors, nurse practitioners, PTs, chiropractors, surgeons, pain specialists and rheumatologists              | Funded by the Ontario Ministry of Health and Long-Term Care to enable shared-care management of LBP; Implemented in rural, urban and metropolitan settings.                                                                                                                        |
| Saskatchewan Spine Pathway          | (53,54)            | Promote EBP and/or guideline-concordant care; Promote integrated care; Improve care effectiveness and efficiency; Reduce variations in practice patterns; Reduce wait times for care, imaging and/or specialist review; Optimise referral behaviour for care and/or imaging | LBP, radicular pain | Stratified (by pattern diagnosis)                   | PHC and SSP clinics                                                             | Physicians, spine surgeons and specialised PTs                                                                | Pathway developed by spine surgeons; It uses a multidisciplinary triage process and treatment algorithms based on the SSP classification; The SSP classification defines 4 clinical patterns of symptoms and signs determined by history and physical examination.                 |
| Back pain Assessment Clinic         | (55)               | Promote EBP and/or guideline-concordant care; Promote integrated care; Optimise referral behaviour for care and/or imaging; Reduce wait times for care, imaging and/or specialist review                                                                                    | LBP or neck pain    | Stepped                                             | PHC, tertiary neurosurgery and orthopaedic referral centre                      | Practice PTs, rheumatology registrars, rheumatologists, neurosurgeons, orthopaedic spinal surgeons            | BAC is a community-based specialist service for assessing and managing neck and LBP; Pathway developed by health professionals of the Royal Melbourne Hospital (RMH), which serves as a tertiary neurosurgery and orthopaedic referral centre; Rheumatologist coordinate BAC care. |

**Abbreviations:** BAC – Back pain Assessment Clinic; EBP – Evidence-Based Practice; GPs – General Practitioner; ISAEC – Inter-professional Spine Assessment and Education Clinics; LBP – Low Back Pain; MoC – Model of Care; NERBPP – North East Low Back and Radicular Pain Pathway; NICE - National Institute of Health and Care Excellence; NHS – National Health System; PHC – Primary Healthcare; PT – Physiotherapy; PTs – Physiotherapists; SSP – Saskatchewan Spine Pathway; TTPs - Triage and Treat practitioners;

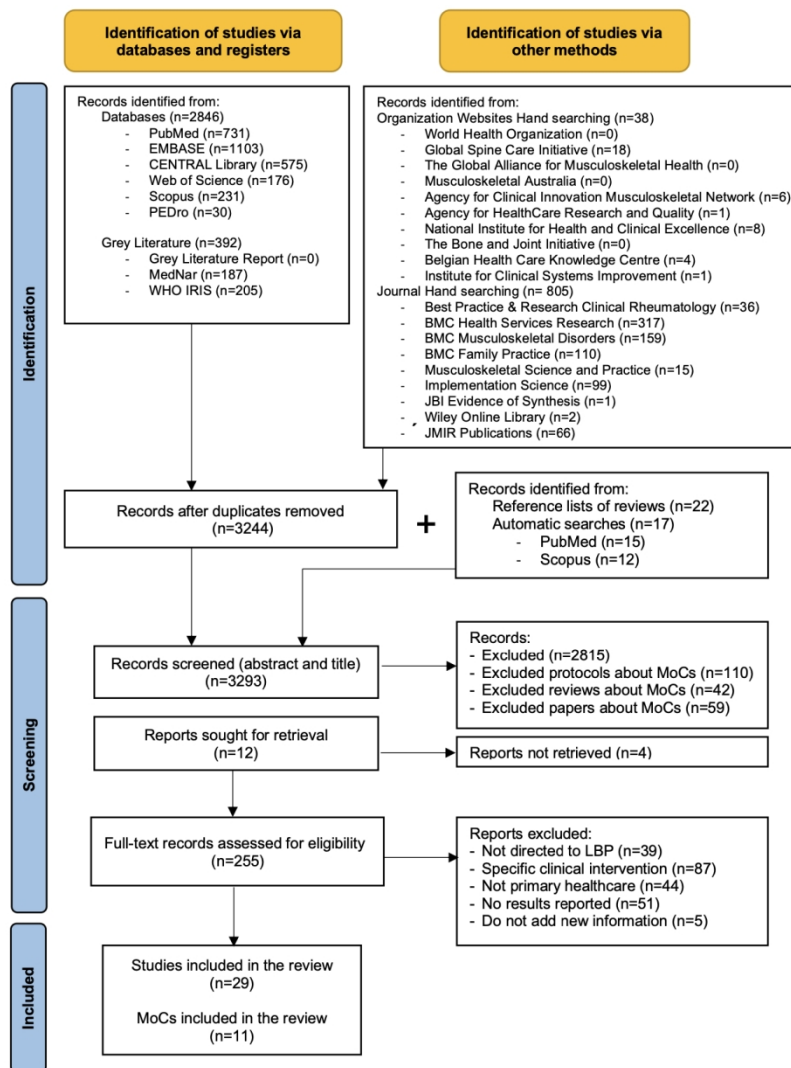

Figure 1. PRISMA flow diagram showing the identification, screening, eligibility and inclusion process of the articles.

133x144mm (300 x 300 DPI)



1  
2  
3  
4  
5  
6  
7  
8  
9  
10  
11  
12  
13  
14  
15  
16  
17  
18  
19  
20  
21  
22  
23  
24  
25  
26  
27  
28  
29  
30  
31  
32  
33  
34  
35  
36  
37  
38  
39  
40  
41  
42  
43  
44  
45  
46  
47  
48  
49  
50  
51  
52  
53  
54  
55  
56  
57  
58  
59  
60

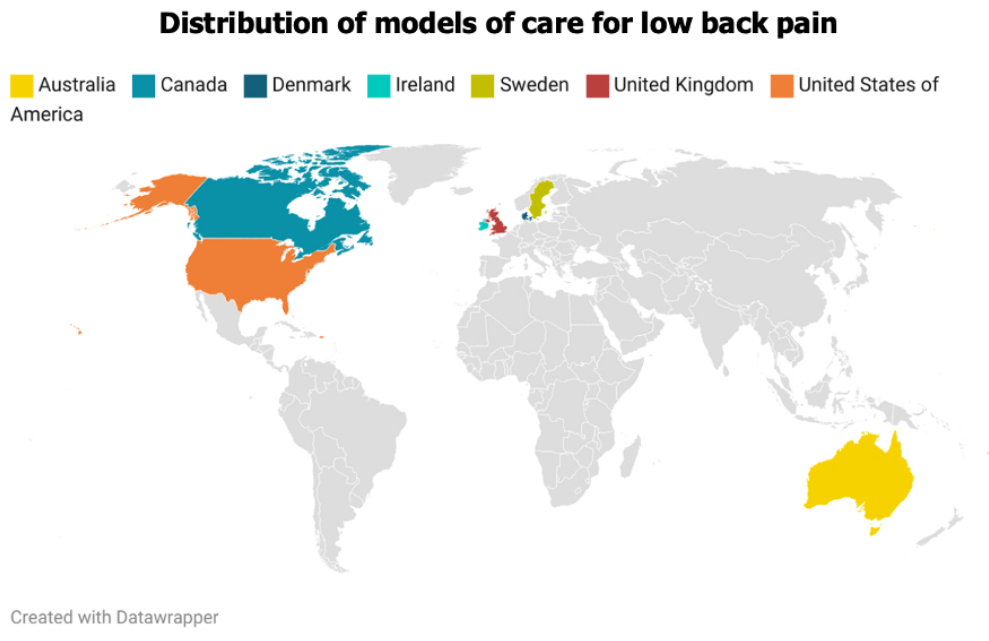

Figure 2. Geographical representation of the MoCs implemented for LBP in primary healthcare worldwide  
47x30mm (472 x 472 DPI)

1  
2  
3  
4  
5  
6  
7  
8  
9  
10  
11  
12  
13  
14  
15  
16  
17  
18  
19  
20  
21  
22  
23  
24  
25  
26  
27  
28  
29  
30  
31  
32  
33  
34  
35  
36  
37  
38  
39  
40  
41  
42  
43  
44  
45  
46  
47  
48  
49  
50  
51  
52  
53  
54  
55  
56  
57  
58  
59  
60

**Type of care offered by the models of care**

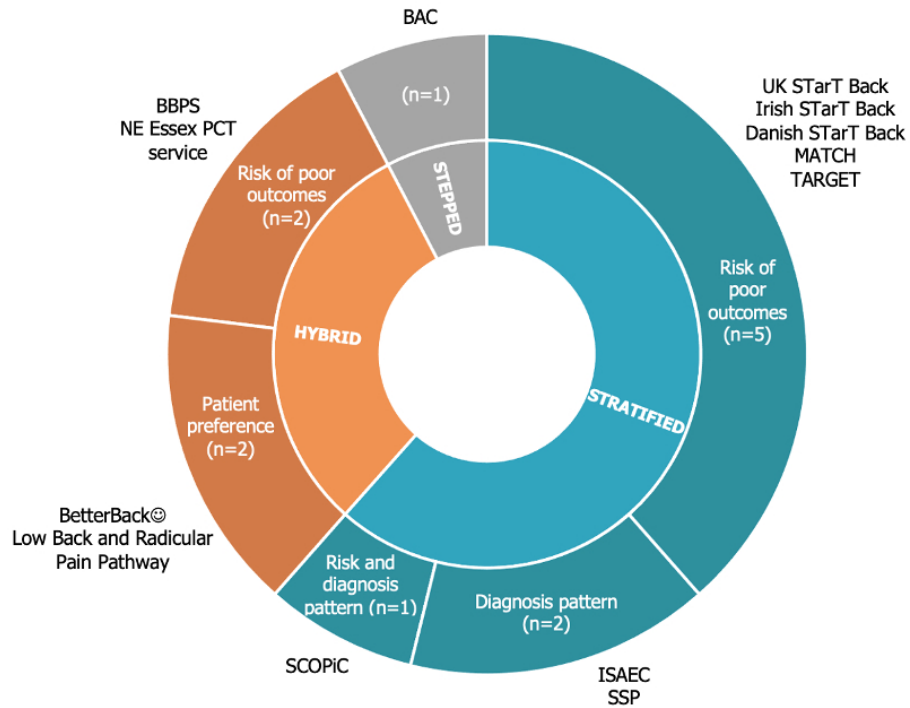

Figure 3. Sunburst chart representing the different approaches of care delivered by the MoCs implemented for LBP in primary healthcare

47x38mm (472 x 472 DPI)

| SECTION                           | ITEM | PRISMA-ScR CHECKLIST ITEM                                                                                                                                                                                                                                                 | REPORTED ON PAGE #                              |
|-----------------------------------|------|---------------------------------------------------------------------------------------------------------------------------------------------------------------------------------------------------------------------------------------------------------------------------|-------------------------------------------------|
| <b>TITLE</b>                      |      |                                                                                                                                                                                                                                                                           |                                                 |
| Title                             | 1    | Identify the report as a scoping review.                                                                                                                                                                                                                                  | Title page – page 1                             |
| <b>ABSTRACT</b>                   |      |                                                                                                                                                                                                                                                                           |                                                 |
| Structured summary                | 2    | Provide a structured summary that includes (as applicable): background, objectives, eligibility criteria, sources of evidence, charting methods, results, and conclusions that relate to the review questions and objectives.                                             | Abstract – page 2                               |
| <b>INTRODUCTION</b>               |      |                                                                                                                                                                                                                                                                           |                                                 |
| Rationale                         | 3    | Describe the rationale for the review in the context of what is already known. Explain why the review questions/objectives lend themselves to a scoping review approach.                                                                                                  | Pages 4 and 5                                   |
| Objectives                        | 4    | Provide an explicit statement of the questions and objectives being addressed with reference to their key elements (e.g., population or participants, concepts, and context) or other relevant key elements used to conceptualize the review questions and/or objectives. | Research question and aims – Page 6 line 161    |
| <b>METHODS</b>                    |      |                                                                                                                                                                                                                                                                           |                                                 |
| Protocol and registration         | 5    | Indicate whether a review protocol exists; state if and where it can be accessed (e.g., a Web address); and if available, provide registration information, including the registration number.                                                                            | Page 5 line 152                                 |
| Eligibility criteria              | 6    | Specify characteristics of the sources of evidence used as eligibility criteria (e.g., years considered, language, and publication status), and provide a rationale.                                                                                                      | Inclusion criteria and Search Strategy (page 6) |
| Information sources*              | 7    | Describe all information sources in the search (e.g., databases with dates of coverage and contact with authors to identify additional sources), as well as the date the most recent search was executed.                                                                 | Search strategy (page 6)                        |
| Search                            | 8    | Present the full electronic search strategy for at least 1 database, including any limits used, such that it could be repeated.                                                                                                                                           | Supplementary File 2                            |
| Selection of sources of evidence† | 9    | State the process for selecting sources of evidence (i.e., screening and eligibility) included in the scoping review.                                                                                                                                                     | Study selection (page 6 and 7)                  |
| Data charting process‡            | 10   | Describe the methods of charting data from the included sources of evidence (e.g., calibrated forms or forms that have been tested by the team before their use, and whether data charting was done independently or in duplicate) and                                    | Data charting (page 7);<br>Additional File 3    |

| SECTION                                              | ITEM | PRISMA-ScR CHECKLIST ITEM                                                                                                                                                                             | REPORTED ON PAGE #                             |
|------------------------------------------------------|------|-------------------------------------------------------------------------------------------------------------------------------------------------------------------------------------------------------|------------------------------------------------|
|                                                      |      | any processes for obtaining and confirming data from investigators.                                                                                                                                   |                                                |
| Data items                                           | 11   | List and define all variables for which data were sought and any assumptions and simplifications made.                                                                                                | Data charting (page 7);<br>Additional File 3   |
| Critical appraisal of individual sources of evidence | 12   | If done, provide a rationale for conducting a critical appraisal of included sources of evidence; describe the methods used and how this information was used in any data synthesis (if appropriate). | Not applicable                                 |
| Synthesis of results                                 | 13   | Describe the methods of handling and summarizing the data that were charted.                                                                                                                          | Synthesis and presentation of results (page 7) |
| <b>RESULTS</b>                                       |      |                                                                                                                                                                                                       |                                                |
| Selection of sources of evidence                     | 14   | Give numbers of sources of evidence screened, assessed for eligibility, and included in the review, with reasons for exclusions at each stage, ideally using a flow diagram.                          | Literature search (page 7); Figure 1           |
| Characteristics of sources of evidence               | 15   | For each source of evidence, present characteristics for which data were charted and provide the citations.                                                                                           | Page 8; Table 1                                |
| Critical appraisal within sources of evidence        | 16   | If done, present data on critical appraisal of included sources of evidence (see item 12).                                                                                                            | Not applicable                                 |
| Results of individual sources of evidence            | 17   | For each included source of evidence, present the relevant data that were charted that relate to the review questions and objectives.                                                                 | Pages 8 to 12                                  |
| Synthesis of results                                 | 18   | Summarize and/or present the charting results as they relate to the review questions and objectives.                                                                                                  | Pages 8 to 12                                  |
| <b>DISCUSSION</b>                                    |      |                                                                                                                                                                                                       |                                                |
| Summary of evidence                                  | 19   | Summarize the main results (including an overview of concepts, themes, and types of evidence available), link to the review questions and objectives, and consider the relevance to key groups.       | Page 12 - First paragraph                      |
| Limitations                                          | 20   | Discuss the limitations of the scoping review process.                                                                                                                                                | Page 13                                        |
| Conclusions                                          | 21   | Provide a general interpretation of the results with respect to the review questions and objectives, as well as potential implications and/or next steps.                                             | Page 14                                        |
| <b>FUNDING</b>                                       |      |                                                                                                                                                                                                       |                                                |
| Funding                                              | 22   | Describe sources of funding for the included sources of evidence, as well as sources of funding for the scoping review. Describe the role of the funders of the scoping review.                       | Page 14                                        |

**MEDLINE (Pubmed) – January 13<sup>th</sup>, 2022**

| Search                                                         | Query                                                                                                                                                                                                                                                                                                                                                                                                                                                                                                                                                                                                                                                                                                                                                                                                                                                                                                                                                                                                                                                                                                                                                                                                                                                                                                                                                                                                 | Records retrieved |
|----------------------------------------------------------------|-------------------------------------------------------------------------------------------------------------------------------------------------------------------------------------------------------------------------------------------------------------------------------------------------------------------------------------------------------------------------------------------------------------------------------------------------------------------------------------------------------------------------------------------------------------------------------------------------------------------------------------------------------------------------------------------------------------------------------------------------------------------------------------------------------------------------------------------------------------------------------------------------------------------------------------------------------------------------------------------------------------------------------------------------------------------------------------------------------------------------------------------------------------------------------------------------------------------------------------------------------------------------------------------------------------------------------------------------------------------------------------------------------|-------------------|
| #1                                                             | ("back pain" [Mesh]) OR ("back pain" [tiab]) OR ("low-back pain" [Mesh]) OR ("low back pain" [tiab]) OR ("sciatica" [Mesh]) OR ("sciatica neuropathy" [Mesh]) OR ("sciatica" [tiab]) OR ("backache" [tiab]) OR ("back ache" [tiab]) OR ("lumb* pain" [tiab]) OR ("lumbago" [tiab]) OR ("spinal pain" [tiab]) OR ("spondylosis" [tiab]) OR ("back disorder" [tiab]))                                                                                                                                                                                                                                                                                                                                                                                                                                                                                                                                                                                                                                                                                                                                                                                                                                                                                                                                                                                                                                   | 91 347            |
| #2                                                             | ((("Models, Organizational"[Mesh]) OR ((theor*[tiab] OR concept*[tiab] OR framework*[tiab] OR model*[tiab] OR program*[tiab] OR approach*[tiab])) AND ((("critical pathways"[MeSH] OR "model of care"[tiab] OR "care model"[tiab] OR "functional integration"[tiab] OR "clinical integration"[tiab] OR "case management"[MeSH] OR "delivery of health care, integrated"[MeSH] OR "disease management"[MeSH] OR "patient care management"[MeSH] OR "patient-centered care"[MeSH] OR "continuity of patient care"[MeSH] OR "comprehensive health care"[MeSH] OR "managed care program*[tiab] OR "multidisciplinary care"[tiab] OR "interdisciplinary care"[tiab] OR "inter-disciplinary care"[tiab] OR "cross disciplinary care"[tiab] OR "cross-disciplinary care"[tiab] OR "multiple interventions"[tiab] OR "care chain"[tiab] OR "care chains"[tiab] OR "care continuity"[tiab] OR "care continuation"[tiab] OR "care transition*"[tiab] OR "chain of care"[tiab] OR "continuity of care"[tiab] OR "cross sectoral care"[tiab] OR "integrated health care"[tiab] OR "integrated medicine"[tiab] OR "integrated social network*"[tiab] OR "integration of care"[tiab] OR "intersectoral care"[tiab] OR "linked care"[tiab] OR "management model"[tiab] OR "service network*"[tiab] OR "transition of care"[tiab] OR "transitional care"[tiab] OR "transmural care"[tiab] OR "holistic care"[tiab]))) | 384 556           |
| #3                                                             | ("primary health care"[MeSH] OR (("primary"[tiab] AND "health"[tiab]) AND "care"[tiab])) OR ("primary health care"[tiab] OR ("primary"[tiab] AND "care"[tiab]) OR "primary care"[tiab])) OR (("general practice"[MeSH] OR ("general"[tiab] AND "practice"[tiab]) OR "general practice"[tiab])) OR ("general"[tiab] AND "medicine"[tiab]) OR "general medicine"[tiab]) OR ("family practice"[MeSH] OR ("family"[tiab] AND "practice"[tiab]) OR "family practice"[tiab])) OR ("family"[tiab] AND "medicine"[tiab])) OR "family medicine"[tiab]) OR (("primaries"[tiab] OR "primary"[tiab]) AND "servic*"[tiab])                                                                                                                                                                                                                                                                                                                                                                                                                                                                                                                                                                                                                                                                                                                                                                                         | 597 247           |
| #4                                                             | #1 AND #2 AND #3                                                                                                                                                                                                                                                                                                                                                                                                                                                                                                                                                                                                                                                                                                                                                                                                                                                                                                                                                                                                                                                                                                                                                                                                                                                                                                                                                                                      | 854               |
| <b>Limited to: since 2000, English, Portuguese and Spanish</b> |                                                                                                                                                                                                                                                                                                                                                                                                                                                                                                                                                                                                                                                                                                                                                                                                                                                                                                                                                                                                                                                                                                                                                                                                                                                                                                                                                                                                       | 731               |

**EMBASE – December 3<sup>rd</sup> 2022**

| Search | Query                                                                                                                                                                                                                                                                                                                                                                                                                                                                                                                                                                                                                                                       | Records retrieved |
|--------|-------------------------------------------------------------------------------------------------------------------------------------------------------------------------------------------------------------------------------------------------------------------------------------------------------------------------------------------------------------------------------------------------------------------------------------------------------------------------------------------------------------------------------------------------------------------------------------------------------------------------------------------------------------|-------------------|
| #1     | ('backache'/exp OR 'sciatica'/exp OR 'spondylosis'/exp) AND ('nonbiological model'/exp OR 'disease management'/exp OR 'holistic care'/exp OR 'patient care'/exp OR 'transitional care'/exp OR 'interdisciplinary care'/exp OR 'case management'/exp OR 'multidisciplinary care'/exp OR 'disease management program'/exp) AND ('primary health care'/exp OR 'general practice'/exp) AND ([english]/lim OR [portuguese]/lim OR [spanish]/lim) AND [2000-2022]/py AND ([article]/lim OR [article in press]/lim OR [data papers]/lim OR [editorial]/lim OR [erratum]/lim OR [letter]/lim OR [note]/lim OR [review]/lim OR [short survey]/lim OR [preprint]/lim) | 1103              |

('back pain' OR 'low-back pain' OR 'low back pain' OR 'sciatica neuropathy' OR 'sciatica' OR 'backache' OR 'back ache' OR 'lumb\* pain' OR 'lumbago' OR 'spinal pain' OR 'spondylosis' OR 'back disorder')

**AND**

('models,organizational' OR theor\* OR concept\* OR framework\* OR model\* OR program\* OR approach\*) AND ('critical pathways' OR 'model of care' OR 'care model' OR 'functional integration' OR 'clinical integration' OR 'case management' OR 'delivery of health care, integrated' OR 'disease management' OR 'patient care management' OR 'patient-centered care' OR 'continuity of patient care' OR 'comprehensive health care' OR 'managed care program\*' OR 'multidisciplinary care' OR 'interdisciplinary care' OR 'inter-disciplinary care' OR 'cross disciplinary care' OR 'cross-disciplinary care' OR 'multiple interventions' OR 'care chain' OR 'care chains' OR 'care continuity' OR 'care continuation' OR 'care transition\*' OR 'chain of care' OR 'continuity of care' OR 'cross sectoral care' OR 'integrated health care' OR 'integrated medicine' OR 'integrated social network\*' OR 'integration of care' OR 'intersectoral care' OR 'linked care' OR 'management model' OR 'service network\*' OR 'transition of care' OR 'transitional care' OR 'transmural care' OR 'holistic care')

**AND** (((((primary AND health AND care OR primary) AND care OR general) AND practice OR general) AND medicine OR family) AND practice OR family) AND medicine **AND** [2000-2022]/py AND ([english]/lim OR [portuguese]/lim OR [spanish]/lim)

#### Cochrane Central Register of Controlled Trials (CENTRAL) – December 3<sup>rd</sup> 2022

| Search | Query                                                                                                                                                                                                                                                                                                                                                                                                                                                                                                                                                                                                                                                                                                                                                                                                                                                                                                                  | Records retrieved |
|--------|------------------------------------------------------------------------------------------------------------------------------------------------------------------------------------------------------------------------------------------------------------------------------------------------------------------------------------------------------------------------------------------------------------------------------------------------------------------------------------------------------------------------------------------------------------------------------------------------------------------------------------------------------------------------------------------------------------------------------------------------------------------------------------------------------------------------------------------------------------------------------------------------------------------------|-------------------|
| #1     | MeSH low back pain - explode all                                                                                                                                                                                                                                                                                                                                                                                                                                                                                                                                                                                                                                                                                                                                                                                                                                                                                       | 4317              |
| #2     | MeSH back pain - explode all                                                                                                                                                                                                                                                                                                                                                                                                                                                                                                                                                                                                                                                                                                                                                                                                                                                                                           | 5503              |
| #3     | MeSH lumbosacral region - explode all                                                                                                                                                                                                                                                                                                                                                                                                                                                                                                                                                                                                                                                                                                                                                                                                                                                                                  | 513               |
| #4     | (back pain):ti,ab OR (low-back pain):ti,ab OR (low back pain):ti,ab OR sciatica:ti,ab OR (sciatic neuropathy):ti,ab OR backache:ti,ab OR (back ache):ti,ab OR (lumbar pain):ti,ab OR lumbago:ti,ab OR (spinal pain):ti,ab OR spondylosis:ti,ab OR (back disorder):ti,ab                                                                                                                                                                                                                                                                                                                                                                                                                                                                                                                                                                                                                                                | 28822             |
| #5     | {OR #1-#4}                                                                                                                                                                                                                                                                                                                                                                                                                                                                                                                                                                                                                                                                                                                                                                                                                                                                                                             | <b>29452</b>      |
| #6     | MeSH models, organizational - explode all                                                                                                                                                                                                                                                                                                                                                                                                                                                                                                                                                                                                                                                                                                                                                                                                                                                                              | 180               |
| #7     | (theor*):ti,ab OR (concept*):ti,ab OR (framework*):ti,ab OR (model*):ti,ab OR (approach*):ti,ab                                                                                                                                                                                                                                                                                                                                                                                                                                                                                                                                                                                                                                                                                                                                                                                                                        | 238742            |
| #8     | #6 OR #7                                                                                                                                                                                                                                                                                                                                                                                                                                                                                                                                                                                                                                                                                                                                                                                                                                                                                                               | <b>238768</b>     |
| #9     | MeSH critical pathways – explode all                                                                                                                                                                                                                                                                                                                                                                                                                                                                                                                                                                                                                                                                                                                                                                                                                                                                                   | 205               |
| #10    | MeSH case management – explode all                                                                                                                                                                                                                                                                                                                                                                                                                                                                                                                                                                                                                                                                                                                                                                                                                                                                                     | 718               |
| #11    | MeSH delivery of health care - explode all                                                                                                                                                                                                                                                                                                                                                                                                                                                                                                                                                                                                                                                                                                                                                                                                                                                                             | 48924             |
| #12    | MeSH disease management - explode all                                                                                                                                                                                                                                                                                                                                                                                                                                                                                                                                                                                                                                                                                                                                                                                                                                                                                  | 5229              |
| #13    | MeSH patient care management - explode all                                                                                                                                                                                                                                                                                                                                                                                                                                                                                                                                                                                                                                                                                                                                                                                                                                                                             | 26892             |
| #14    | MeSH patient-centered care - explode all                                                                                                                                                                                                                                                                                                                                                                                                                                                                                                                                                                                                                                                                                                                                                                                                                                                                               | 818               |
| #15    | MeSH continuity of patient care - explode all                                                                                                                                                                                                                                                                                                                                                                                                                                                                                                                                                                                                                                                                                                                                                                                                                                                                          | 27999             |
| #16    | MeSH comprehensive health care - explode all                                                                                                                                                                                                                                                                                                                                                                                                                                                                                                                                                                                                                                                                                                                                                                                                                                                                           | 11355             |
| #17    | {OR #9-#16}                                                                                                                                                                                                                                                                                                                                                                                                                                                                                                                                                                                                                                                                                                                                                                                                                                                                                                            | <b>84746</b>      |
| #18    | (model of care):ti,ab OR (care model):ti,ab OR (multidisciplinary care):ti,ab OR (interdisciplinary care):ti,ab OR (inter-disciplinary care):ti,ab OR (cross disciplinary care):ti,ab OR (cross-disciplinary care):ti,ab OR (multiple interventions):ti,ab OR (care chain):ti,ab OR (care continuity):ti,ab OR (care continuation):ti,ab OR (care transition):ti,ab OR (chain* of care):ti,ab OR (continuity of care):ti,ab OR (cross sectoral care):ti,ab OR (integrated health care):ti,ab OR (integrated medicine):ti,ab OR (integrated social network):ti,ab OR (integration of care):ti,ab OR (intersectoral care):ti,ab OR (linked care):ti,ab OR (management model):ti,ab OR (service network) OR (transition of care):ti,ab OR (transitional care):ti,ab OR (transmural care):ti,ab OR (holistic care):ti,ab OR (functional integration):ti,ab OR (clinical integration):ti,ab OR (managed care program):ti,ab | 48372             |

|                                       |                                                                                                                                                                                                                                |            |
|---------------------------------------|--------------------------------------------------------------------------------------------------------------------------------------------------------------------------------------------------------------------------------|------------|
| #19                                   | #6 OR (#7 AND (#17 OR #18))                                                                                                                                                                                                    | 107093     |
| #20                                   | MeSH primary health care - explode all                                                                                                                                                                                         | 8157       |
| #21                                   | MeSH general practice - explode all                                                                                                                                                                                            | 2494       |
| #22                                   | MeSH family practice - explode all                                                                                                                                                                                             | 1980       |
| #23                                   | (primary health care):ti,ab OR (primary healthcare):ti,ab OR (primary care):ti,ab OR (general practice):ti,ab OR (general medicine):ti,ab OR (family practice):ti,ab OR (family medicine):ti,ab OR (primar* AND servic*):ti,ab | 10793      |
| #24                                   | {OR #20-#23}                                                                                                                                                                                                                   | 110252     |
| #25                                   | #5 AND #19 AND #24                                                                                                                                                                                                             | 590        |
| <b>Limits to: Jan 2000 – Dec 2022</b> |                                                                                                                                                                                                                                | <b>575</b> |

**PEDro – December 2<sup>nd</sup> 2022**

| Search | Query                                                                                                                                                                                                                                                               | Records retrieved |
|--------|---------------------------------------------------------------------------------------------------------------------------------------------------------------------------------------------------------------------------------------------------------------------|-------------------|
| #1     | Abstract & Title= (primary care model of care)<br>Problem= (pain)<br>Body Part= (lumbar spine, sacro-iliac joint or pelvis)<br>Subdiscipline= (musculoskeletal)<br>Method= (clinical trial)<br>Published since=2000<br>When Searching: Match all search terms (AND) | 30                |

**SCOPUS – December 3<sup>rd</sup> 2022**

| Search                                                  | Query                                                                                                                                                                                                                                                                                                                                                                                                                                                                                                                                                                                                                                                                                                                                                                                                                                                                                                                                                                                                                                                                                                                                                                                                                                                                                                                                                                                                                                                                                                                                                                                                                                                                                                                                                                                   | Records retrieved |
|---------------------------------------------------------|-----------------------------------------------------------------------------------------------------------------------------------------------------------------------------------------------------------------------------------------------------------------------------------------------------------------------------------------------------------------------------------------------------------------------------------------------------------------------------------------------------------------------------------------------------------------------------------------------------------------------------------------------------------------------------------------------------------------------------------------------------------------------------------------------------------------------------------------------------------------------------------------------------------------------------------------------------------------------------------------------------------------------------------------------------------------------------------------------------------------------------------------------------------------------------------------------------------------------------------------------------------------------------------------------------------------------------------------------------------------------------------------------------------------------------------------------------------------------------------------------------------------------------------------------------------------------------------------------------------------------------------------------------------------------------------------------------------------------------------------------------------------------------------------|-------------------|
| #1                                                      | TITLE-ABS-KEY(("back pain") OR ("back pain") OR ("low-back pain") OR ("low back pain") OR ("sciatica") OR ("sciatic neuropathy") OR ("sciatica") OR ("backache") OR ("back ache") OR ("lumbar pain") OR ("lumbago") OR ("spinal pain") OR ("spondylosis") OR ("back disorder")) AND TITLE-ABS-KEY(("model W/2 care" OR "care model") OR ((theor* OR concept* OR framework* OR model* OR program* OR approach*) AND ("critical path*" OR "care path*" OR "clinical path*" OR (delivery W/2 care) OR "functional integration" OR "clinical integration" OR "case management" OR "managed care" OR "Patient care plan" OR "integrated delivery system*" OR "integrated care" OR "disease N2 management" OR "care management" OR "care management" OR (comprehensive W/2 care) OR (comprehensive W/2 health*care) OR "Patient*Cent*red Care" OR "Patient Focused Care" OR (continuity W/2 care) OR (continuity W/2 *care) OR (continuum W/2 care) OR (multidisciplinary W/2 care) OR (inter*disciplinary W/2 care) OR ("cross*disciplinary" W/2 care) OR "multiple intervention" OR (care W/2 chain*) OR (care W/2 continuity) OR (care W/2 continuation) OR (*care W/2 transition) OR (chain AND w/2*care) OR (continuity W/2 care) OR "cross sectoral care" OR "integrated medicine" OR "integrated social network" OR (integrat* W/2 care) OR "intersectoral care" OR "linked care" OR (management W/2 model) OR (servic* W/2 network*) OR (transition W/2 care) OR (transitional W/2 care) OR (transmural W/2 care) OR (holistic W/2 care)))) AND TITLE-ABS-KEY((primary AND n3 AND care) OR "primary care" OR "primary health*care" OR "general practice" OR "general medicine" OR "family practice" OR "family medicine" OR (("primaries" OR "primary") AND (service* OR servicing))) | 231               |
| Limited to: since 2000, English, Portuguese and Spanish |                                                                                                                                                                                                                                                                                                                                                                                                                                                                                                                                                                                                                                                                                                                                                                                                                                                                                                                                                                                                                                                                                                                                                                                                                                                                                                                                                                                                                                                                                                                                                                                                                                                                                                                                                                                         |                   |

**Web of Science Core Collection – December 3<sup>rd</sup> 2022**

| Search | Query                                                                                                                                                           | Records retrieved |
|--------|-----------------------------------------------------------------------------------------------------------------------------------------------------------------|-------------------|
| #1     | ((("back pain") OR ("back pain") OR ("low-back pain") OR ("low back pain") OR ("sciatica") OR ("sciatica neuropathy") OR ("sciatica") OR ("backache") OR ("back | 176               |

ache") OR ("lumb\* pain") OR ("lumbago") OR ("spinal pain") OR ("spondylosis") OR ("back disorder")) (Topic)

AND

((("Models, Organizational") OR ((theor\* OR concept\* OR framework\* OR model\* OR program\* OR approach\*)) AND ((("critical pathways" OR "model of care" OR "care model" OR "functional integration" OR "clinical integration" OR "case management" OR "delivery of health care, integrated" OR "disease management" OR "patient care management" OR "patient-centered care" OR "continuity of patient care" OR "comprehensive health care" OR "managed care program\*" OR "multidisciplinary care" OR "interdisciplinary care" OR "inter-disciplinary care" OR "cross disciplinary care" OR "cross-disciplinary care" OR "multiple interventions" OR "care chain" OR "care chains" OR "care continuity" OR "care continuation" OR "care transition\*" OR "chain of care" OR "continuity of care" OR "cross sectoral care" OR "integrated health care" OR "integrated medicine" OR "integrated social network\*" OR "integration of care" OR "intersectoral care" OR "linked care" OR "management model" OR "service network\*" OR "transition of care" OR "transitional care" OR "transmural care" OR "holistic care")))) (Topic)

AND

primary health care OR primary healthcare OR primary care OR general practice OR general medicine OR family practice OR family medicine (Topic)

#### Grey Literature Report – December 2<sup>nd</sup> 2022

| Search | Query                                                                                                                                                                                                                                                                                                                                                                                                                       | Records retrieved |
|--------|-----------------------------------------------------------------------------------------------------------------------------------------------------------------------------------------------------------------------------------------------------------------------------------------------------------------------------------------------------------------------------------------------------------------------------|-------------------|
| #1     | ("back pain" OR "low back pain" OR "sciatica" OR "lumbago" OR "backache") AND ("model of care" OR "care model" OR "clinical pathway" OR "care pathway" OR "service delivery" OR "integrated care" OR "care management" OR "comprehensive care" OR "care chain") AND ("Primary care" OR "primary healthcare" OR "primary health care" OR "general practice" OR "general medicine" OR "primary service" OR "family practice") | 0                 |

#### MedNar Search Engine – December 2<sup>nd</sup> 2022

| Search | Query                                                                                                                                                                                                                                                                                                                                                                                                                                               | Records retrieved |
|--------|-----------------------------------------------------------------------------------------------------------------------------------------------------------------------------------------------------------------------------------------------------------------------------------------------------------------------------------------------------------------------------------------------------------------------------------------------------|-------------------|
| #1     | ("back pain" OR "low back pain" OR "sciatica" OR "lumbago" OR "backache") AND ("model of care" OR "care model" OR "clinical pathway" OR "care pathway" OR "service delivery" OR "integrated care" OR "care management" OR "comprehensive care" OR "care chain") AND ("Primary care" OR "primary healthcare" OR "primary health care" OR "general practice" OR "general medicine" OR "primary service" OR "family practice") / From: 2000 / To: 2022 | 187               |

#### World Health Organization Institutional Repository for Information Sharing (WHO-IRIS) – December 2<sup>nd</sup> 2022

| Search | Query                                                                                                                                                                                                                                                                                                                                                                                                                                           | Records retrieved |
|--------|-------------------------------------------------------------------------------------------------------------------------------------------------------------------------------------------------------------------------------------------------------------------------------------------------------------------------------------------------------------------------------------------------------------------------------------------------|-------------------|
| #1     | ("model of care" OR "care model" OR "clinical pathway" OR "care pathway" OR "service delivery" OR "integrated care" OR "care management" OR "comprehensive care" OR "care chain") AND ("Primary care" OR "primary healthcare" OR "primary health care" OR "general practice" OR "general medicine" OR "primary service" OR "family practice") AND ("back pain" OR "low back pain" OR "sciatica" OR "lumbago" OR "backache") / Date: 2000 - 2022 | 205               |



| SUMMARY OF THE PAPER                                                                  |                                                                                                                                                                                                                |
|---------------------------------------------------------------------------------------|----------------------------------------------------------------------------------------------------------------------------------------------------------------------------------------------------------------|
| <b>Title</b>                                                                          |                                                                                                                                                                                                                |
| <b>Authors</b>                                                                        |                                                                                                                                                                                                                |
| <b>Year of publication</b>                                                            |                                                                                                                                                                                                                |
| <b>Source of information</b><br><i>(Peer review or grey literature)</i>               |                                                                                                                                                                                                                |
| <b>Study design</b><br><i>(Define intervention vs control group, if applicable)</i>   |                                                                                                                                                                                                                |
| <b>Objectives</b>                                                                     |                                                                                                                                                                                                                |
| <b>Population</b><br><i>(Include inclusion and exclusion criteria)</i>                |                                                                                                                                                                                                                |
| <b>Sample size</b><br><i>(Intervention vs control group, if applicable)</i>           |                                                                                                                                                                                                                |
| IDENTIFICATION OF THE MoC                                                             |                                                                                                                                                                                                                |
| <b>Name or Acronym</b> <i>(if applicable)</i>                                         |                                                                                                                                                                                                                |
| <b>Country</b>                                                                        |                                                                                                                                                                                                                |
| <b>Other references</b><br><i>(Protocol, other studies, if applicable)</i>            |                                                                                                                                                                                                                |
| <b>Goals of the MoC</b>                                                               |                                                                                                                                                                                                                |
| <b>Funding</b><br><i>(How the MoC is funded and how is it sustained at long-term)</i> | E.g., research funding or funding at a system level                                                                                                                                                            |
| CORE COMPONENTS OF THE MoC <sup>(1-3)</sup>                                           |                                                                                                                                                                                                                |
| <b>Underlying theories, models or frameworks</b> <sup>(2)</sup>                       | <b>Process models/frameworks</b><br><i>(e.g., CIHR Model of Knowledge Translation, ACE Star Model of Knowledge Transformation, Knowledge-to-Action Model, Ottawa Model, Quality Implementation Framework).</i> |
| <b>Process models/frameworks</b>                                                      |                                                                                                                                                                                                                |

|                                                                                                                                                                                                                                                                                                                                                                                                                                                                                                                                                                                                                                                                                                                                                                                                                                                                                                                                                                                                                                                                                                                                                                                                                                                                                                                                                                         |                                                                                                                                                                                                                                                                                                                                                                                                                                                                                                                                                                                                                                                                                                                                                                                                                              |
|-------------------------------------------------------------------------------------------------------------------------------------------------------------------------------------------------------------------------------------------------------------------------------------------------------------------------------------------------------------------------------------------------------------------------------------------------------------------------------------------------------------------------------------------------------------------------------------------------------------------------------------------------------------------------------------------------------------------------------------------------------------------------------------------------------------------------------------------------------------------------------------------------------------------------------------------------------------------------------------------------------------------------------------------------------------------------------------------------------------------------------------------------------------------------------------------------------------------------------------------------------------------------------------------------------------------------------------------------------------------------|------------------------------------------------------------------------------------------------------------------------------------------------------------------------------------------------------------------------------------------------------------------------------------------------------------------------------------------------------------------------------------------------------------------------------------------------------------------------------------------------------------------------------------------------------------------------------------------------------------------------------------------------------------------------------------------------------------------------------------------------------------------------------------------------------------------------------|
| <p><i>Definition: Describe or guide the process of translating research into practice, including the implementation and use of research. Provide practical guidance in the planning and execution of implementation endeavors and/or implementation strategies to facilitate implementation.</i></p> <p><b>Determinant frameworks</b><br/> <i>Definition: Frameworks that identify determinants, which act as barriers and enablers (independent variables) that influence implementation outcomes (dependent variables), such as predicting outcomes or interpreting outcomes retrospectively. Some frameworks also specify relationships between some types of determinants.</i></p> <p><b>Classic theories</b><br/> <i>Definition: Theories that originate from fields external to implementation science, such as psychology, sociology and organizational theory, which can be applied to provide understanding and/or explanation of aspects of implementation.</i></p> <p><b>Implementation theories/frameworks</b><br/> <i>Definition: Theories/frameworks that have been developed by implementation researchers to provide understanding and/or explanation of aspects of implementation.</i></p> <p><b>Evaluation frameworks</b><br/> <i>Definition: Identify aspects of implementation that could be evaluated to determine implementation success.</i></p> | <p><b>Determinant frameworks, classic theories or implementation frameworks</b><br/> <i>Definition: Understand and explain what influences implementation outcomes.</i></p> <ul style="list-style-type: none"> <li>• <b>Determinant frameworks</b> (e.g., Theoretical Domains Framework, PARIHS, CFIR, Active Implementation Framework, Understanding-User-Context Framework).</li> <li>• <b>Classic theories</b> (e.g., Theory of Diffusion, social cognitive theories, theories concerning cognitive processes and decision making, social networks theories, communities of practice, professional theories, organizational theories).</li> <li>• <b>Implementation theories/frameworks</b> (e.g., COM-B, Implementation Climate, Absorptive Capacity, Organizational Readiness, Normalization Process Theory)</li> </ul> |
|                                                                                                                                                                                                                                                                                                                                                                                                                                                                                                                                                                                                                                                                                                                                                                                                                                                                                                                                                                                                                                                                                                                                                                                                                                                                                                                                                                         | <p><b>Evaluation frameworks</b><br/> (e.g., RE-AIM, PRECEDE-PROCEED, framework by Proctor et al.)</p>                                                                                                                                                                                                                                                                                                                                                                                                                                                                                                                                                                                                                                                                                                                        |
| <p><b>Setting</b><br/> <i>(Describe the settings where assessment/care/other is provided)</i></p>                                                                                                                                                                                                                                                                                                                                                                                                                                                                                                                                                                                                                                                                                                                                                                                                                                                                                                                                                                                                                                                                                                                                                                                                                                                                       | <p>E.g., Assessment – Primary care; Delivery of care – private outpatient clinic</p>                                                                                                                                                                                                                                                                                                                                                                                                                                                                                                                                                                                                                                                                                                                                         |
| <p><b>Care pathway</b><br/> <i>(Summary description of the care pathway)</i></p>                                                                                                                                                                                                                                                                                                                                                                                                                                                                                                                                                                                                                                                                                                                                                                                                                                                                                                                                                                                                                                                                                                                                                                                                                                                                                        | <p>E.g., Community pharmacist consultation [evaluation, education and medication review] – GP referral and PT referral – PT guided exercise program (only if approved by the GP), re-assessed in 3-6 weeks</p>                                                                                                                                                                                                                                                                                                                                                                                                                                                                                                                                                                                                               |
| <p><b>Characteristics of the intervention</b></p>                                                                                                                                                                                                                                                                                                                                                                                                                                                                                                                                                                                                                                                                                                                                                                                                                                                                                                                                                                                                                                                                                                                                                                                                                                                                                                                       | <p>E.g., Education + exercise: two patient education sessions and a supervised exercise program twice a week for 6 weeks in a group setting.</p>                                                                                                                                                                                                                                                                                                                                                                                                                                                                                                                                                                                                                                                                             |

|                                                                                                                                                                                                                                                                                                                                                                                                                                                                                                                                                               |                                                                                                                                                                                                                                                                                                                                                                                                                                                          |
|---------------------------------------------------------------------------------------------------------------------------------------------------------------------------------------------------------------------------------------------------------------------------------------------------------------------------------------------------------------------------------------------------------------------------------------------------------------------------------------------------------------------------------------------------------------|----------------------------------------------------------------------------------------------------------------------------------------------------------------------------------------------------------------------------------------------------------------------------------------------------------------------------------------------------------------------------------------------------------------------------------------------------------|
| <p>(Describe the interventions - what care is provided, by who and for how long)</p>                                                                                                                                                                                                                                                                                                                                                                                                                                                                          | <p>Education: encourage the patients to actively engage in the management of LBP – group sessions – first about LBP, treatment options (including exercise).</p> <p>Exercise: 6 weeks, twice a week of supervised, targeted and individualized exercise in a group setting; home exercises were encouraged as individuals developed quality movement and participants were encouraged to increase their engagement in enjoyable physical activities.</p> |
| <p><b>Care Coordination</b><sup>(3)</sup><br/> <i>Definition: Care coordination is the deliberate organization of patient care activities between two or more participants (including the patient) involved in a patient's care to facilitate the appropriate delivery of health care services. Organizing care involves the marshalling of personnel and other resources needed to carry out all required patient care activities, and is often managed by the exchange of information among participants responsible for different aspects of care.</i></p> | <p><b>Health professionals involved</b></p> <p><b>Care Coordination</b><br/> <i>(Summary description of who is involved in providing care and how care is coordinated)</i></p> <p><b>Exchange of clinical information</b><br/> <i>(e.g., tools to record clinical data, meetings, case manager)</i></p>                                                                                                                                                  |
| <b>IMPLEMENTATION STRATEGY</b>                                                                                                                                                                                                                                                                                                                                                                                                                                                                                                                                |                                                                                                                                                                                                                                                                                                                                                                                                                                                          |
| <p><b>Duration</b></p>                                                                                                                                                                                                                                                                                                                                                                                                                                                                                                                                        |                                                                                                                                                                                                                                                                                                                                                                                                                                                          |
| <p><b>Implementation Strategies</b><sup>(4)</sup><br/> <i>Definition: methods or techniques used to enhance the adoption, implementation, and sustainability of a clinical program or practice</i></p>                                                                                                                                                                                                                                                                                                                                                        |                                                                                                                                                                                                                                                                                                                                                                                                                                                          |
| <p><b>Workforce capacity</b><br/> <i>(Description of the training for health professionals, staff or other team members)</i></p>                                                                                                                                                                                                                                                                                                                                                                                                                              |                                                                                                                                                                                                                                                                                                                                                                                                                                                          |
| <p><b>Barriers and Facilitators to Implementation</b></p>                                                                                                                                                                                                                                                                                                                                                                                                                                                                                                     |                                                                                                                                                                                                                                                                                                                                                                                                                                                          |
| <b>CONTEXT SPECIFIC COMPONENTS OF THE MoC(5,6)</b>                                                                                                                                                                                                                                                                                                                                                                                                                                                                                                            |                                                                                                                                                                                                                                                                                                                                                                                                                                                          |
| <p><b>Micro/Patient level factors</b><br/> <i>Patients' preferences, expectancies, attitudes, knowledge, needs and resources that can influence implementation; specific geographic areas with different access to health services, sub-populations with special socio-demographic and clinical characteristics.</i></p>                                                                                                                                                                                                                                      |                                                                                                                                                                                                                                                                                                                                                                                                                                                          |
| <p><b>Meso/Organizational level factors</b></p> <p><b>Organizational culture and climate</b></p>                                                                                                                                                                                                                                                                                                                                                                                                                                                              |                                                                                                                                                                                                                                                                                                                                                                                                                                                          |



|                                                                                                                                                                                                                                                                                                                                                                                                                                                                                                                                                                                                                                                                                                                                                                                                                                |                                                                          |                       |
|--------------------------------------------------------------------------------------------------------------------------------------------------------------------------------------------------------------------------------------------------------------------------------------------------------------------------------------------------------------------------------------------------------------------------------------------------------------------------------------------------------------------------------------------------------------------------------------------------------------------------------------------------------------------------------------------------------------------------------------------------------------------------------------------------------------------------------|--------------------------------------------------------------------------|-----------------------|
| <p><b>Financial resources</b><br/><i>Funding, reimbursement, incentives, rewards, costs and other economic factors that can influence implementation.</i></p> <p><b>Leadership</b><br/><i>Influences on implementation related to formal and informal leaders, including managers, key individuals, change agents, opinion leaders, champions, etc.</i></p> <p><b>Time availability</b><br/><i>Time restrictions that can influence implementation.</i></p> <p><b>Feedback</b><br/><i>Evaluation, assessment and various forms of mechanisms that can monitor and feedback results concerning the implementation, which can influence implementation.</i></p> <p><b>Physical environment</b><br/><i>Features of the physical environment that can influence implementation (e.g., equipment, facilities and supplies).</i></p> |                                                                          |                       |
| <b>OUTCOMES(1,7) AND RESULTS</b>                                                                                                                                                                                                                                                                                                                                                                                                                                                                                                                                                                                                                                                                                                                                                                                               |                                                                          |                       |
| <p><b>Patient level outcomes</b><br/><i>Definition: impact of the model of care on patients (e.g., pain, function or quality of life, satisfaction, collected with self-reported questionnaires or interview questionnaires or performance measures, at baseline and 3-month follow-up)</i></p>                                                                                                                                                                                                                                                                                                                                                                                                                                                                                                                                | <p><b>Outcomes</b><br/><b>Outcome measures</b><br/><b>Follow-ups</b></p> | <p><b>Results</b></p> |
| <p><b>Organizational level outcomes</b><br/><i>Definition: impact on health services, providers or on health-system (e.g., rate of referral or prescription for exercise, rate of prescribed exams, healthcare costs, waiting times – collected with administrative/clinical databases, quality indicators, questionnaires or interviews with providers)</i></p>                                                                                                                                                                                                                                                                                                                                                                                                                                                               | <p><b>Outcomes</b><br/><b>Outcome measures</b><br/><b>Follow-ups</b></p> | <p><b>Results</b></p> |
| <p><b>Implementation level outcomes</b><br/><i>Definition: Effects of deliberate and purposive actions to implement new treatments, practices, and services. Implementation outcomes serve as indicators of the implementation success and are key intermediate outcomes in relation to service system or clinical outcomes in treatment</i></p>                                                                                                                                                                                                                                                                                                                                                                                                                                                                               | <p><b>Outcomes</b><br/><b>Outcome measures</b><br/><b>Follow-ups</b></p> | <p><b>Results</b></p> |

|                                                                                                                                                                                                                           |  |  |
|---------------------------------------------------------------------------------------------------------------------------------------------------------------------------------------------------------------------------|--|--|
| <i>effectiveness and quality of care research – <u>Acceptability;</u><br/> <u>Adoption;</u> <u>Appropriateness;</u> <u>Costs;</u> <u>Feasibility;</u> <u>Fidelity;</u><br/> <u>Penetration;</u> <u>Sustainability</u></i> |  |  |
|---------------------------------------------------------------------------------------------------------------------------------------------------------------------------------------------------------------------------|--|--|

**References**

1. Briggs AM, Jordan JE, Jennings M, Speerin R, Chua J, Bragge P, et al. A Framework to Evaluate Musculoskeletal Models of Care [Internet]. Cornwall, UK; 2016.
2. Nilsen P. Making sense of implementation theories, models and frameworks. *Implement Sci.* 2015;10(1):1–13. doi: 10.1186/s13012-015-0242-0
3. Schultz EM, McDonald KM. What is care coordination? *Int J Care Coord* [Internet]. 2014;17(1–2):5–24.
4. Powell BJ, Waltz TJ, Chinman MJ, Damschroder LJ, Smith JL, Matthieu MM, et al. A refined compilation of implementation strategies: Results from the Expert Recommendations for Implementing Change (ERIC) project. *Implement Sci* [Internet]. 2015;10(1):1–14.
5. Nilsen P, Bernhardsson S. Context matters in implementation science: A scoping review of determinant frameworks that describe contextual determinants for implementation outcomes. *BMC Health Serv Res* [Internet]. 2019;19(1):1–21.
6. Lau R, Stevenson F, Ong BN, Dziedzic K, Treweek S, Eldridge S, et al. Achieving change in primary care-causes of the evidence to practice gap: Systematic reviews of reviews. *Implement Sci.* 2016;11(1). doi: 10.1186/s13012-016-0396-4
7. Proctor E, Silmere H, Raghavan R, Hovmand P, Aarons G, Bunger A, et al. Outcomes for implementation research: Conceptual distinctions, measurement challenges, and research agenda. *Adm Policy Ment Heal Ment Heal Serv Res* [Internet]. 2011;38(2):65–76.

**Additional File 4 – Description of the included studies**

| MoC design ation                              | Study                       | Population                                                                                                                                                                                                                                                                                                                  | Sample Size                                                 | Outcome Domains (Follow-ups) | Outcomes (outcome measures)                                                                                                                                                                                                                                                                                                                                                                                                                                                                                                                                                          |                |                             |                                                                                                                                                                                                                                                                                                                                                                                                                                                                                                                                                                                                                                                                                                       |
|-----------------------------------------------|-----------------------------|-----------------------------------------------------------------------------------------------------------------------------------------------------------------------------------------------------------------------------------------------------------------------------------------------------------------------------|-------------------------------------------------------------|------------------------------|--------------------------------------------------------------------------------------------------------------------------------------------------------------------------------------------------------------------------------------------------------------------------------------------------------------------------------------------------------------------------------------------------------------------------------------------------------------------------------------------------------------------------------------------------------------------------------------|----------------|-----------------------------|-------------------------------------------------------------------------------------------------------------------------------------------------------------------------------------------------------------------------------------------------------------------------------------------------------------------------------------------------------------------------------------------------------------------------------------------------------------------------------------------------------------------------------------------------------------------------------------------------------------------------------------------------------------------------------------------------------|
| START BACK – Subgroups for Targeted Treatment | Hill et al. (2011)(1)       | <ul style="list-style-type: none"> <li>- Inclusion: LBP of any duration, ≥18 years-old, with or without radiculopathy.</li> <li>- Exclusion: serious illness or spinal pathology, serious comorbidity (including mental disorders), surgery in the last 6 months, pregnancy, currently receiving back treatment.</li> </ul> | N=851 patients<br>- Intervention: n=568<br>- Control: n=283 | Patient (4 and 12 mo)        | <b>4 and 12 months</b><br>- <b>Primary outcome:</b> Disability [Roland Morris Disability Questionnaire (RMDQ)] at 12 months; Back pain intensity (NRS); Catastrophizing [Pain Catastrophizing Scale (PCS)]; Fear-avoidance beliefs [Tampa Scale of Kinesiophobia (TSK)]; Anxiety and depression [Hospital Anxiety and Depression Scale (HADS)]; Health-related quality of life [EuroQol EQ-5D; Short Form 12 (SF-12)]; Risk subgroup reduction [STarT Back Screening Tool (SBST)]; Global change (single question); Adverse events<br><b>12 Months</b><br>- Work loss (one question) |                |                             |                                                                                                                                                                                                                                                                                                                                                                                                                                                                                                                                                                                                                                                                                                       |
|                                               |                             |                                                                                                                                                                                                                                                                                                                             |                                                             | Organizational (4 and 12 mo) | <b>Process of care [Case Report Forms (CRFs)]</b><br>- Referral for further PT; Number of PT sessions; Attendance at initial PT<br><b>4 months</b><br>- Patient satisfaction (self-reported questionnaire)<br><b>12 months</b><br>- Healthcare resource use (self-reported questionnaire); cost-utility (QALYs estimates using the EuroQol EQ-5D)                                                                                                                                                                                                                                    |                |                             |                                                                                                                                                                                                                                                                                                                                                                                                                                                                                                                                                                                                                                                                                                       |
|                                               | Whitehurst et al. (2012)(2) |                                                                                                                                                                                                                                                                                                                             |                                                             | Patient (4 and 12 mo)        | <b>4 and 12 months</b><br>- Health-related quality of life [EQ-5D]<br><b>12 months</b><br>- Work-related outcomes - Employment status (self-reported questionnaire)                                                                                                                                                                                                                                                                                                                                                                                                                  |                |                             |                                                                                                                                                                                                                                                                                                                                                                                                                                                                                                                                                                                                                                                                                                       |
|                                               |                             |                                                                                                                                                                                                                                                                                                                             |                                                             | Organizational (4 and 12 mo) | <b>12 months</b><br>- Number of PT sessions (CRF); Healthcare resource use (self-reported questionnaire) – PHC consultations (GPs and practice nurses), consultations with other healthcare professionals (NHS and private), hospital-based procedures (diagnostic tests, epidural injections, inpatient episodes) and prescribed medication; Healthcare costs - Out of pocket expenditures on treatments and/or aids (self-reported questionnaire) and QALYs estimates (EuroQol EQ-5D)                                                                                              |                |                             |                                                                                                                                                                                                                                                                                                                                                                                                                                                                                                                                                                                                                                                                                                       |
|                                               | Foster et al. (2014)(3)     |                                                                                                                                                                                                                                                                                                                             |                                                             |                              | <ul style="list-style-type: none"> <li>- Inclusion: ≥18 years-old, LBP patients of any duration, with or without leg pain, identified through diagnostic codes.</li> <li>- Phase 1 (usual care): n=368</li> <li>- Phase 3 (stratified care): n=554</li> </ul>                                                                                                                                                                                                                                                                                                                        | N=922 patients | Patient (2 and 6 mo)        | <b>2 and 6 months</b><br>- <b>Primary outcome:</b> Disability (RMDQ) at 6 months; Back pain intensity (NRS); Catastrophizing [Coping Strategies Questionnaire – Catastrophizing subscale (CSQ-CAT)]; Pain self-efficacy [Pain Self-efficacy Questionnaire (PSEQ)]; Health-related quality of life (SF-12); Global change (single question)<br><b>6 months</b><br>- Fear-avoidance beliefs (TSK); Anxiety and depression (HADS); Pain self-efficacy (PSEQ); Risk group (STarT Back Screening Tool); Work loss (one question); Adverse events                                                                                                                                                           |
|                                               |                             |                                                                                                                                                                                                                                                                                                                             |                                                             |                              |                                                                                                                                                                                                                                                                                                                                                                                                                                                                                                                                                                                      |                | Organizational (2 and 6 mo) | <b>Process of care (medical records and CRF)</b><br>- Numbers of referrals to PT or other services; Ordered diagnostic tests (radiographs, magnetic resonance imaging and computed tomography scans, blood tests); Prescribed medications; Reconsultations with the physician; Sickness certifications; Risk-appropriate use of PT (CRF).<br><b>2 and 6 months</b><br>- Patient satisfaction (self-reported questionnaire)<br><b>6 months</b><br>- Healthcare resource use (self-reported questionnaire) – Inpatient stays, outpatient visits, other health care appointments including those in private practice and over-the-counter medications and treatments; Healthcare costs (QALYs estimates) |

|                                            |                               |                                                                                                                                                                                                                                                                                                                                                                                                                                                                                                                                                                                                           |                                                                                                                                                                                                                                                                                          |                                                  |                                                                                                                                                                                                                                                                                                                                                                                                                                                                                                                                                                                                                                                                                                                                                                                                                                                                                                                                            |
|--------------------------------------------|-------------------------------|-----------------------------------------------------------------------------------------------------------------------------------------------------------------------------------------------------------------------------------------------------------------------------------------------------------------------------------------------------------------------------------------------------------------------------------------------------------------------------------------------------------------------------------------------------------------------------------------------------------|------------------------------------------------------------------------------------------------------------------------------------------------------------------------------------------------------------------------------------------------------------------------------------------|--------------------------------------------------|--------------------------------------------------------------------------------------------------------------------------------------------------------------------------------------------------------------------------------------------------------------------------------------------------------------------------------------------------------------------------------------------------------------------------------------------------------------------------------------------------------------------------------------------------------------------------------------------------------------------------------------------------------------------------------------------------------------------------------------------------------------------------------------------------------------------------------------------------------------------------------------------------------------------------------------------|
| SCOPIC – Sciatica Outcomes in Primary Care | Whitehurst et al. (2015)(4)   |                                                                                                                                                                                                                                                                                                                                                                                                                                                                                                                                                                                                           |                                                                                                                                                                                                                                                                                          | Patient (2 and 6 mo)                             | <p><b>2 and 6 months</b></p> <ul style="list-style-type: none"> <li>- Disability (RMDQ); Health-related quality of life (EQ-5D-3L)</li> </ul> <p><b>6 Months</b></p> <ul style="list-style-type: none"> <li>- Work-related – Employment status (self-reported questionnaire) and work loss (self-reported questionnaire)</li> </ul>                                                                                                                                                                                                                                                                                                                                                                                                                                                                                                                                                                                                        |
|                                            |                               |                                                                                                                                                                                                                                                                                                                                                                                                                                                                                                                                                                                                           |                                                                                                                                                                                                                                                                                          | Organizational (2 and 6 mo)                      | <p><b>6 months</b></p> <ul style="list-style-type: none"> <li>- Healthcare resource use (self-reported questionnaire) – PHC consultations (GPs and practice nurses), consultations with other healthcare professionals (NHS and private), hospital-based procedures (diagnostic tests, epidural injections, inpatient episodes), prescribed medication and out of pocket expenditure on treatments and/or aids; Cost-utility (QALYs estimates using the EQ-5D-3L).</li> </ul>                                                                                                                                                                                                                                                                                                                                                                                                                                                              |
|                                            | Murphy et al. (2016)(5)       | <ul style="list-style-type: none"> <li>- Inclusion: ≥18 years old, LBP &gt; 3 months, with or without leg symptoms.</li> <li>- Exclusion: serious illness or spinal pathology, surgery, pregnancy.</li> </ul>                                                                                                                                                                                                                                                                                                                                                                                             | <p>N=583</p> <ul style="list-style-type: none"> <li>- Intervention: n=251</li> <li>- Control: n=332</li> </ul>                                                                                                                                                                           | Patient (3 mo)                                   | <p><b>3 months</b></p> <ul style="list-style-type: none"> <li>- <u>Primary outcome</u>: Disability (RMDQ); LBP intensity [Visual Analog Scale (VAS)]; Back beliefs [Back Beliefs Questionnaire (BBQ)]; Distress [Distress and Risk Assessment Method (DRAM)]; Depression (Modified Zung Depression Index); Anxiety [Modified Somatic Perception Questionnaire (MSPQ)]; Benefit (6-point self-rated scale).</li> </ul>                                                                                                                                                                                                                                                                                                                                                                                                                                                                                                                      |
|                                            | Morsø et al. (2021)(6)        | <ul style="list-style-type: none"> <li>- Inclusion: ≥18 years, non-specific LBP of any duration, with or without leg pain, referred to PT by the GP.</li> <li>- Exclusion: serious illness or spinal pathology, psychiatric illness, spinal surgery in the last 6 months, pregnancy, currently receiving PT.</li> </ul>                                                                                                                                                                                                                                                                                   | <p>N=333</p> <ul style="list-style-type: none"> <li>- Intervention: n=169</li> <li>- Control: n=164</li> </ul>                                                                                                                                                                           | Patient (3 and 12 mo)                            | <p><b>3 and 12 months</b></p> <ul style="list-style-type: none"> <li>- <u>Primary outcome</u>: Disability (RMDQ); <u>Primary outcome</u>: Time off work (days/weeks) [patient self-report and Danish National Register of Public Transfer Payments (DREAM)]; <u>Primary outcome</u>: Patient reported global change (7-point Likert scale); Pain intensity (NRS); Well-being [World Health Organization Well-Being Index (WHO5)]</li> </ul>                                                                                                                                                                                                                                                                                                                                                                                                                                                                                                |
|                                            |                               |                                                                                                                                                                                                                                                                                                                                                                                                                                                                                                                                                                                                           |                                                                                                                                                                                                                                                                                          | Organizational (3 and 12 mo)                     | <p><b>3 and 12 months</b></p> <ul style="list-style-type: none"> <li>- Satisfaction with improvement (single-item rating)</li> </ul> <p><b>12 months</b></p> <ul style="list-style-type: none"> <li>- Healthcare resource use (Danish Nationwide Patient Registry - DNPR) – Number of PT sessions, PHC consultations, secondary care (imaging and other contacts) and medication; Healthcare costs use (Danish Nationwide Patient Registry - DNPR) – PHC consultations, secondary care (imaging and other contacts), medication and total costs; QALYs estimates (EQ-5D-5L).</li> </ul>                                                                                                                                                                                                                                                                                                                                                    |
|                                            | Konstantinou et al. (2020)(7) | <ul style="list-style-type: none"> <li>- Inclusion: ≥18 years, with mobile phone or landline, consulted in GP with back and/or leg symptoms, with diagnosis of sciatica confirmed with at least 70% diagnostic confidence by a PT.</li> <li>- Exclusion: serious spinal pathology or red flags, previous lumbar spine surgery, receiving ongoing care from or had been in consultation with a secondary care doctor or PT for the same problem in the previous 3 months, serious physical or mental comorbidities, pregnancy, taking part simultaneously in another study related to sciatica.</li> </ul> | <p>RCT: N=476</p> <ul style="list-style-type: none"> <li>- Intervention: n=238</li> <li>- Control: n=238</li> </ul> <p>Qualitative study: N=40</p> <ul style="list-style-type: none"> <li>- 20 patients</li> <li>- 7 spinal PTs</li> <li>- 9 GPs</li> <li>- 4 spinal surgeons</li> </ul> | Patient (Weekly for the first 4 mo, 4 and 12 mo) | <p><b>Weekly for the first 4 months, 4 weeks between 4 and 12 months, or until “stable resolution” of symptoms</b></p> <ul style="list-style-type: none"> <li>- <u>Primary outcome</u>: time to first resolution of sciatica symptoms (6-point ordinal scale)</li> </ul> <p><b>4 and 12 months</b></p> <ul style="list-style-type: none"> <li>- Global Perceived Change (6-point ordinal scale); Physical Function (Modified RMDQ); Impact of sciatica symptoms [Sciatica Bothersomeness Index (SBI)]; Back and leg pain intensity (NRS); Sleep disturbance [Jenkins Sleep Questionnaire (JSQ)]; Fear of movement (TSK); Anxiety and depression (HADS); Health-related quality of life (EQ-5D-5L); General health [Short-form 1 (SF1)]; Neuropathic pain symptoms [Self-report Leeds Assessment of Neuropathic Symptoms and Signs (S-LANSS)]; Work and productivity loss (self-reported questionnaire); Serious adverse events.</li> </ul> |
| Fost                                       |                               |                                                                                                                                                                                                                                                                                                                                                                                                                                                                                                                                                                                                           |                                                                                                                                                                                                                                                                                          | Organizational (4 and 12 mo)                     | <p><b>12 months</b></p> <ul style="list-style-type: none"> <li>- Healthcare resource use (self-reported questionnaire and medical records) – Number of PT sessions, duration of PT treatments, timing of referral and treatment, spinal injections and spinal surgery; Healthcare costs (self-reported questionnaire and medical records) – Total costs and QALYs estimates (EQ-5D-5L)</li> </ul>                                                                                                                                                                                                                                                                                                                                                                                                                                                                                                                                          |
|                                            |                               |                                                                                                                                                                                                                                                                                                                                                                                                                                                                                                                                                                                                           |                                                                                                                                                                                                                                                                                          | Patient                                          | <p><b>Weekly for the first 4 months, 4 weeks between 4 and 12 months, or until “stable resolution” of symptoms</b></p>                                                                                                                                                                                                                                                                                                                                                                                                                                                                                                                                                                                                                                                                                                                                                                                                                     |



|                                                                                     |                                  |                                                                                                                                                                                                                                                                                           |                                                                                                     |                                                                                           |                                                                                                                                                                                                                                                                                                                                                                                                                                                                                                                                                                                                                                                                                                                                                                                                                                                    |
|-------------------------------------------------------------------------------------|----------------------------------|-------------------------------------------------------------------------------------------------------------------------------------------------------------------------------------------------------------------------------------------------------------------------------------------|-----------------------------------------------------------------------------------------------------|-------------------------------------------------------------------------------------------|----------------------------------------------------------------------------------------------------------------------------------------------------------------------------------------------------------------------------------------------------------------------------------------------------------------------------------------------------------------------------------------------------------------------------------------------------------------------------------------------------------------------------------------------------------------------------------------------------------------------------------------------------------------------------------------------------------------------------------------------------------------------------------------------------------------------------------------------------|
|                                                                                     |                                  |                                                                                                                                                                                                                                                                                           |                                                                                                     | <p>(Weekly for the first 4 mo, 4 and 12 mo)</p>                                           | <p>- <b>Primary outcome:</b> time to first resolution of sciatica symptoms (6-point ordinal scale)<br/> <b>4 and 12 months</b><br/>                 - Global Perceived Change (6-point ordinal scale); Physical Function (Modified RMDQ); Impact of sciatica symptoms (SBI); Back and leg pain intensity (NRS); Sleep disturbance (JSQ); Fear of movement (TSK); Anxiety and depression (HADS); Risk of poor outcome (SBST); Health-related quality of life (EQ-5D-5L); General health (SF1); Neuropathic pain symptoms (S-LANSS); Employment status (self-reported questionnaire); Work loss (self-reported questionnaire); Presenteeism/productivity [single question with NRS response (0–10 scale); Work Production Index]; Adverse events</p>                                                                                                 |
|                                                                                     |                                  |                                                                                                                                                                                                                                                                                           |                                                                                                     | <p>Organizational (4 and 12 mo)</p>                                                       | <p><b>Process of care (CRFs)</b><br/>                 - Number of referrals to PT services; Number of PT sessions; Number of referrals to specialist spinal services and/or secondary care; Treatments provided; Timing of referral and treatment<br/> <b>4 and 12 months</b><br/>                 - Patient satisfaction (5-point scale)<br/> <b>12 months</b><br/>                 - Healthcare resource use (self-reported questionnaire and medical records) – PHC consultations (GPs, nurses and PTs), secondary care consultations, prescriptions, hospital-based tests and procedures, spinal injections and spinal surgery, nature and length of inpatient stays; Healthcare costs (self-reported questionnaire and medical records) – Over-the-counter purchases, out-of-pocket expenses, total costs and QALYs estimates (EQ-5D-5L).</p> |
|                                                                                     | <p>Saunders et al. (2020)(</p>   | <p>- Inclusion: Patients on the ‘fast-track’ pathway in the stratified care arm of the SCOPiC trial and clinicians</p>                                                                                                                                                                    |                                                                                                     | <p>Implementation (4 mo after the follow-up of the RCT and at the end of recruitment)</p> | <p><b>4 months after the follow up of the RCT (patients, PTs and surgeons) and at the end of RCT recruitment (GPs)</b><br/>                 - Acceptability of the ‘fast-track’ pathway for patients with severe sciatica symptoms (interviews)</p>                                                                                                                                                                                                                                                                                                                                                                                                                                                                                                                                                                                                |
| <p><b>MATCH – Matching Appropriate Treatment to Consumers’ Healthcare needs</b></p> | <p>Cherkin et al. (2018)(10)</p> | <p>- Inclusion: Adults receiving primary care, ≥ 18 years, identified in the EHR with a primary diagnosis of non-specific LBP<br/><br/>                 - Exclusion: Specific causes of pain (e.g., pregnancy, disc herniation, vertebral fracture, spinal stenosis) or job injuries.</p> | <p>N=1901<br/><br/>                 - Intervention: n=756<br/>                 - Control: n=945</p> | <p>Patient (2 and 6 mo)</p>                                                               | <p><b>2 and 6 months</b><br/>                 - <b>Primary outcome:</b> Physical function (modified RMDQ); <b>Primary outcome:</b> LBP severity in previous week (NRS); Anxiety [Generalized Anxiety Disorder (GAD-7)]; Depression [Patient Health Questionnaire (PHQ-9)]; Self-efficacy (PSEQ); Fear of movement (TSK); Work loss and productivity [2 items of the Work Productivity and Activity Impairment (WPAI)]; Global improvement [Patient Global Impression of Change (PGIC)]</p>                                                                                                                                                                                                                                                                                                                                                         |
|                                                                                     |                                  |                                                                                                                                                                                                                                                                                           |                                                                                                     | <p>Organizational (2 and 6 mo)</p>                                                        | <p><b>2 and 6 months</b><br/>                 - Patient satisfaction (10-item instrument)<br/> <b>6 months</b><br/>                 - Healthcare resource use (EHR) – Lumbar spine imaging, additional PHC visits, emergency department visits, narcotic analgesics, PT visits, CAM visits, behavioural health visits, spine surgeon visits, injections of lumbar spine and back-related hospitalizations.</p>                                                                                                                                                                                                                                                                                                                                                                                                                                     |
|                                                                                     | <p>Hsu et al. (2019)(11)</p>     | <p>- Inclusion: PTs and PCPs (medical doctors, osteopathic doctors, nurses, physician assistants)</p>                                                                                                                                                                                     | <p>- Questionnaire: N=402<br/>                 - Interviews: N=22 (PTs and PCPs)</p>                | <p>Implementation (post-training)</p>                                                     | <p><b>Post-training</b><br/>                 - Attendance at training sessions (not reported); Perspectives and experiences regarding implementation strategies and experiences using the stratified care model (Ethnography and interviews with PHC team members and PTs)</p>                                                                                                                                                                                                                                                                                                                                                                                                                                                                                                                                                                     |

|                                                                                        |                             |                                                                                                                                                                                                                                                                                                                                                                              |                                                                                                        |                                                                 |                                                                                                                                                                                                                                                                                                                                                                                                                                                                                                                                                                                                                                                                                                                                                                                                                    |
|----------------------------------------------------------------------------------------|-----------------------------|------------------------------------------------------------------------------------------------------------------------------------------------------------------------------------------------------------------------------------------------------------------------------------------------------------------------------------------------------------------------------|--------------------------------------------------------------------------------------------------------|-----------------------------------------------------------------|--------------------------------------------------------------------------------------------------------------------------------------------------------------------------------------------------------------------------------------------------------------------------------------------------------------------------------------------------------------------------------------------------------------------------------------------------------------------------------------------------------------------------------------------------------------------------------------------------------------------------------------------------------------------------------------------------------------------------------------------------------------------------------------------------------------------|
| TARGET – Targeted Interventions to Prevent Chronic Low Back Pain in High-Risk Patients | Beneciuk et al. (2019)(12)  | - Inclusion: Outpatient PTs                                                                                                                                                                                                                                                                                                                                                  | N=471                                                                                                  | Implementation (post-training and 4 mo)                         | <b>Post-training and 4 months</b><br>- PTs' attitudes and beliefs about biomedical and biopsychosocial treatment orientations [Pain Attitudes and Beliefs Scale for Physical Therapists (PABS-PT)]<br><b>Post-training</b><br>- PTs' confidence in implementing PIPT (11-point Likert scale)                                                                                                                                                                                                                                                                                                                                                                                                                                                                                                                       |
|                                                                                        | Middleton et al. (2020)(13) | - Inclusion: Adult primary care patients with evidence of acute LBP management in the EHR.                                                                                                                                                                                                                                                                                   | - Quantitative study: N=23,913 (9030 patients stratified by risk)<br>- Qualitative study: N=13 clinics | Organizational (24 mo)                                          | <b>24 months (EHR)</b><br>- Risk stratification rates; Rates of referral of acute high-risk patients; Relationship between risk stratification and referral rates within clinics                                                                                                                                                                                                                                                                                                                                                                                                                                                                                                                                                                                                                                   |
|                                                                                        | Delitto et al. (2021)(14)   | - Inclusion: ≥18 years with a primary complaint of LBP.<br><br>- Exclusion: Chronic symptoms based on a 2-item LBP Questionnaire derived from the NIH Chronic LBP task force; serious spinal pathology.                                                                                                                                                                      | N=2300<br><br>- Intervention: n=1207<br>- Control: n=1093                                              | Patient (6 mo)<br><br>Organizational (12 mo)                    | <b>6 months</b><br>- <b>Primary outcome:</b> transition to chronic LBP [2-item questionnaire adapted from the NIH Task Force];<br><b>Primary outcome:</b> back-related disability [Oswestry Disability Index (ODI)]<br><br><b>12 months</b><br>- Process of care (EHR) – Referral to PT or PIPT, referral to medical specialists, diagnostic imaging and orders for opioid prescriptions and other LBP-related pain medications; Healthcare resource use (EHR) – Outpatient visits (PHC and specialists), receipt of diagnostic imaging, interventional pain procedures (e.g., epidural injections), electrodiagnostic tests (e.g., nerve conduction velocity), surgeries, hospitalizations and emergency department visits.                                                                                       |
| BETTERBACK®                                                                            | Schröder et al. (2020)(15)  | - Inclusion: PTs working with LBP patients who attended the BetterBack® workshop                                                                                                                                                                                                                                                                                             | N=116                                                                                                  | Implementation (after, 3 and 12 mo)                             | <b>After, 3 and 12 months</b><br>- <b>Primary outcome:</b> Self-confidence in managing LBP patients [Practitioner Self-Confidence Scale (PCS)]; Determinants of PT's behaviour [Determinants of Implementation Behaviour Questionnaire (DIBQ)].<br><b>3 and 12 months</b><br>- PTs' attitudes and beliefs about biomedical and biopsychosocial treatment orientations (PABS-PT).                                                                                                                                                                                                                                                                                                                                                                                                                                   |
|                                                                                        | Enthoven et al. (2021)(16)  | - Inclusion: Participants previously treated according to the BetterBack MoC for a first-time or recurrent episode of benign LBP with or without radiculopathy.                                                                                                                                                                                                              | N=15                                                                                                   | Implementation (4-14 mo)                                        | <b>4-14 months</b><br>- Patients' experiences of receiving care according to the MoC (interviews)                                                                                                                                                                                                                                                                                                                                                                                                                                                                                                                                                                                                                                                                                                                  |
|                                                                                        | Schröder et al. (2021)(17)  | Patients:<br>- Inclusion: 18–65 years, accessing public primary care due to a first-time or recurrent episode of acute, subacute, or chronic-phase benign LBP, with or without radiculopathy.<br><br>- Exclusion: current or previous malignancy in the last 5 years, serious spinal pathology, spinal surgery the last 2 years, current or previous pregnancy in the last 3 | N=467<br><br>- Intervention: n=264<br>- Control: n=203<br><br>PTs: N=104                               | Patient (3, 6 and 12 mo)<br><br>Organizational (3, 6 and 12 mo) | <b>3, 6 and 12 months</b><br>- <b>Primary outcome:</b> Pain intensity (NRS-LBP); <b>Primary outcome:</b> Function and activity limitations (ODI); Risk stratification (SBST); Health-related quality of life (EQ-5D); Cognitive and emotional representations of illness [Brief Illness Perception Questionnaire (BIPQ)]; Ability to understand and cope with LBP [Pain Enablement Instrument (PEI)]; Perceived change (PGIC)<br><br><b>Process of care</b><br>- Clinical Practice Quality Index – Guideline adherence [(Clinical Reasoning and Process Evaluation tool - CRPE)], number of PT treatments [(Public Healthcare Regional Registry - PHRR)], referral to specialist consultation (PHRR) and medical imaging (PHRR)<br><b>3, 6 and 12 months</b><br>- Patient satisfaction [Patient Satisfaction (PS)] |

|                                     |                                                                                                                                                                                 |                                                                                                                                                                                                                                                                                                                                                                                                 |                                                                                                                                                                                                                                                    |                                                                                                                                                                                                                                                                               |                                                                                                                                                                                                                                                                                                                                                                                                                                                                                                                                                                                                                                                                                                                                                                      |
|-------------------------------------|---------------------------------------------------------------------------------------------------------------------------------------------------------------------------------|-------------------------------------------------------------------------------------------------------------------------------------------------------------------------------------------------------------------------------------------------------------------------------------------------------------------------------------------------------------------------------------------------|----------------------------------------------------------------------------------------------------------------------------------------------------------------------------------------------------------------------------------------------------|-------------------------------------------------------------------------------------------------------------------------------------------------------------------------------------------------------------------------------------------------------------------------------|----------------------------------------------------------------------------------------------------------------------------------------------------------------------------------------------------------------------------------------------------------------------------------------------------------------------------------------------------------------------------------------------------------------------------------------------------------------------------------------------------------------------------------------------------------------------------------------------------------------------------------------------------------------------------------------------------------------------------------------------------------------------|
| Low Back and Radicular Pain Pathway | Schröder et al. (2022)(18)                                                                                                                                                      | <p>months, participants who fulfil the criteria for multimodal/multiprofessional rehabilitation for complex long-standing pain and severe psychiatric diagnosis.</p> <p>PTs:<br/>- Inclusion: PTs who worked regularly with patients with LBP.</p>                                                                                                                                              | <p>Register cohort<br/>- PTs: N=105<br/>- LBP patients: N=500 (intervention n=278; control n=222)</p> <p>CRPE- smaller cohort:<br/>- PTs: N=98 (intervention n=44; control n=54)<br/>- LBP patients: N=388 (intervention n=223; control n=165)</p> | Organizational                                                                                                                                                                                                                                                                | <p><b>Process of care</b><br/>- Adherence to clinical practice guidelines recommendations - Clinical Practice Quality Index (PHRR and CRPE):</p> <ul style="list-style-type: none"> <li>• <b>Primary outcome:</b> Proportion of patients receiving referral to specialist consultation (PHRR), Proportion of patients receiving medical imaging (PHRR), Proportion of patients receiving stratified number of PT visits (PHRR), Proportion of patients receiving educational interventions (CRPE), Proportion of patients receiving exercise interventions (CRPE), Proportion of patients receiving manual therapy (CRPE), Proportion of patients receiving acupuncture (CRPE) and Proportion of patients receiving non-evidence-based treatments (CRPE).</li> </ul> |
|                                     | Greenough (2017)(19)                                                                                                                                                            | - Inclusion: Patients with LBP with or without leg pain.                                                                                                                                                                                                                                                                                                                                        | Not reported                                                                                                                                                                                                                                       | Patient (discharge)                                                                                                                                                                                                                                                           | <p><b>Discharge</b><br/>- Pain intensity (NRS); Disability (ODI); Health-related quality of life (EQ-5D); Anxiety (GAD-7); Depression (PHQ-9); Readiness to self-manage (0–10–point scale).</p>                                                                                                                                                                                                                                                                                                                                                                                                                                                                                                                                                                      |
|                                     |                                                                                                                                                                                 |                                                                                                                                                                                                                                                                                                                                                                                                 |                                                                                                                                                                                                                                                    | Organizational (discharge)                                                                                                                                                                                                                                                    | <p><b>Process of care</b><br/>- Percentage of discharges from treatments (pathway database)</p> <p><b>Discharge</b><br/>- Patient satisfaction [Friends and Family Test (FFT)]</p>                                                                                                                                                                                                                                                                                                                                                                                                                                                                                                                                                                                   |
|                                     | Ryan et al. (2020)(20)                                                                                                                                                          | <p>- Inclusion: ≥18 years, with sciatica, who were under the care of a specialist PT, undergone investigations and received the results within the previous 6 weeks.</p> <p>- Exclusion criteria: previous spinal surgery, cauda equina syndrome or sinister pathology, patients unable to communicate or provide consent; or the researcher had treated them in a previous episode of LBP.</p> | N=14                                                                                                                                                                                                                                               | Implementation (6 weeks)                                                                                                                                                                                                                                                      | <p><b>6 weeks</b><br/>- Patients’ experiences within the NHS pathway (interviews)</p>                                                                                                                                                                                                                                                                                                                                                                                                                                                                                                                                                                                                                                                                                |
|                                     | Martin et al. (2018)(21)                                                                                                                                                        | <p>- Quantitative study: All patients attending during the evaluation period. No exclusion criteria.</p> <p>- Qualitative study: People engaged in the development, implementation, delivery, or patient of the NERBPP (key decision makers, triage and treat practitioners, healthcare professionals, GPs, patients)</p>                                                                       | <p>- Quantitative study: N=3834</p> <p>- Qualitative study: N=35</p>                                                                                                                                                                               | Patient (Discharge, 6 and 12 mo)                                                                                                                                                                                                                                              | <p><b>Discharge, 6 and 12 months</b><br/>- Pain intensity (NRS); Function (ODI); Health status/quality of life (EQ-5D-5L); Anxiety (GAD-7); Depression (PHQ-9)</p> <p><b>Discharge</b><br/>- Global Subjective Outcome Scale (GSOS); Readiness to self-manage (0–10–point scale)</p>                                                                                                                                                                                                                                                                                                                                                                                                                                                                                 |
| Organizational (6 weeks)            |                                                                                                                                                                                 |                                                                                                                                                                                                                                                                                                                                                                                                 |                                                                                                                                                                                                                                                    | <p><b>Discharge</b><br/>- Patient satisfaction (FFT)</p>                                                                                                                                                                                                                      |                                                                                                                                                                                                                                                                                                                                                                                                                                                                                                                                                                                                                                                                                                                                                                      |
| Implementation                      |                                                                                                                                                                                 |                                                                                                                                                                                                                                                                                                                                                                                                 |                                                                                                                                                                                                                                                    | <p><b>Before, during and after implementation</b><br/>- Opinions of clinicians, commissioners and patients regarding the implementation of the pathway (interviews and focus groups)</p>                                                                                      |                                                                                                                                                                                                                                                                                                                                                                                                                                                                                                                                                                                                                                                                                                                                                                      |
| Jess et al. (2018)(22)              | - Inclusion: ≥18 years, patients referred onto the NERBPP by their GP due to acute, new onset, LBP episode or a flare-up of LBP with at least 6 months since their last attack. | N=3834                                                                                                                                                                                                                                                                                                                                                                                          | Patient (discharge)                                                                                                                                                                                                                                | <p><b>Discharge</b><br/>- Pain intensity (NRS); Functional disability (ODI); Health-related quality of life (EQ-5D-5L); Anxiety (GAD-7); Depression (Patient Health Questionnaire -PHQ-9); Perception of improvement (GSOS); Readiness to self-manage (0–10–point scale).</p> |                                                                                                                                                                                                                                                                                                                                                                                                                                                                                                                                                                                                                                                                                                                                                                      |
|                                     |                                                                                                                                                                                 |                                                                                                                                                                                                                                                                                                                                                                                                 | Organizational (discharge)                                                                                                                                                                                                                         | <p><b>Discharge</b><br/>- Patient satisfaction (FFT)</p>                                                                                                                                                                                                                      |                                                                                                                                                                                                                                                                                                                                                                                                                                                                                                                                                                                                                                                                                                                                                                      |
| Jess et al.                         |                                                                                                                                                                                 |                                                                                                                                                                                                                                                                                                                                                                                                 | Patient                                                                                                                                                                                                                                            | <b>6 and 12 months</b>                                                                                                                                                                                                                                                        |                                                                                                                                                                                                                                                                                                                                                                                                                                                                                                                                                                                                                                                                                                                                                                      |

|                                    |                                 |                                                                                                                                                                                                                                                                                                                                                                                                 |                                                                                                                   |                                                                   |                                                                                                                                                                                                                                                                                                                                                                                                                                                                                                                                                                                                                                                                                                                                                                                                              |
|------------------------------------|---------------------------------|-------------------------------------------------------------------------------------------------------------------------------------------------------------------------------------------------------------------------------------------------------------------------------------------------------------------------------------------------------------------------------------------------|-------------------------------------------------------------------------------------------------------------------|-------------------------------------------------------------------|--------------------------------------------------------------------------------------------------------------------------------------------------------------------------------------------------------------------------------------------------------------------------------------------------------------------------------------------------------------------------------------------------------------------------------------------------------------------------------------------------------------------------------------------------------------------------------------------------------------------------------------------------------------------------------------------------------------------------------------------------------------------------------------------------------------|
|                                    |                                 |                                                                                                                                                                                                                                                                                                                                                                                                 | - 6-month follow-up: N=786<br>- 6-month follow-up: N=552                                                          | (6 and 12 mo)<br>Organizational (6 and 12 mo)                     | - Pain intensity (NRS); Functional disability (ODI); Health-related quality of life (EQ-5D-5L); Anxiety (GAD-7); Depression (Patient Health Questionnaire -PHQ-9); Perception of improvement (GSOS)<br><b>6 and 12 months</b><br>- Patient satisfaction (FFT)                                                                                                                                                                                                                                                                                                                                                                                                                                                                                                                                                |
| <b>Beating Back Pain Service</b>   | Cheshire et al. (2013)(24)      | - Inclusion criteria: non-specific LBP, >6 weeks duration, ≥18 years.<br>- Exclusion: presence of red flags, inability to communicate in English, mental health problems and substance abuse.                                                                                                                                                                                                   | N=80                                                                                                              | Patient (discharge and 3 mo)<br>Implementation (post-treatment)   | <b>Discharge and 3 months</b><br>- Musculoskeletal pain [Bournemouth Questionnaire (BQ)]; Health-related quality of life (EQ-5D); Self-efficacy (PSEQ); Positive well-being [5 questions on a 0–10-point scale]; Physical activity levels (0–10-point scale); Analgesic use (single question); Work status (single question).<br><b>Post-treatment</b><br>- Benefits, improvements, comments or suggestions regarding the service [open-ended questions at the end of the self-reported questionnaire]                                                                                                                                                                                                                                                                                                       |
| <b>NE Essex PCT service</b>        | Gurden et al. (2012)(25)        | - Inclusion: Adults, consulting GP for at least 4 weeks for back or neck pain, suitable for manual therapy.<br>- Exclusion: serious pathology or red flags and serious comorbidity.                                                                                                                                                                                                             | N=696                                                                                                             | Patient (discharge)<br>Organizational (discharge)                 | <b>Discharge</b><br>- Back and neck pain (BQ); Impact of symptoms (Bothersomeness Questionnaire); Global improvement scale (7-point scale); Work status (self-reported questionnaire); Medication use (self-reported questionnaire)<br><b>Discharge</b><br>- Patient satisfaction (5-point scale); Healthcare resource use (self-reported questionnaire) – Number of treatments, referrals to secondary care, referrals to GP/other health professionals and discharges.                                                                                                                                                                                                                                                                                                                                     |
| <b>ISAEC</b>                       | Zarrabian et al. (2017)(26)     | - Inclusion: Potential surgical candidates with unmanageable, persistent LBP for more than 6 weeks but less than 52 weeks or recurrent LBP.<br>- Exclusion criteria: pain disorder, narcotic dependency, pregnancy or postpartum less than a year, red flags.                                                                                                                                   | N=422                                                                                                             | Patient (after assessment)<br>Organizational (after assessment)   | <b>At the initial assessment and after the surgeons' assessment</b><br>- Presenting pain pattern (medical records)<br><b>At the initial assessment and after the surgeons' assessment</b><br>- Number and type of imaging (medical records); Referral appropriateness for surgery (medical records); Wait time from PCP referral to assessment at ISAEC (medical records).                                                                                                                                                                                                                                                                                                                                                                                                                                   |
| <b>Saskatchewan Spine Pathway</b>  | Kindrachuk & Fournay (2014)(27) | - Inclusion: Nonemergency referrals of LBP and leg pain.<br>- Exclusion: option of refusing the SSP visit.                                                                                                                                                                                                                                                                                      | N=87<br>- Group A: n=62<br>- Group B: n=25                                                                        | Patient (7 mo)<br>Organizational (7 mo)                           | <b>7 months (May 2011 – November 2011)</b><br>- Disability (ODI); Back and leg pain (VAS); Health-related quality of life (EQ-5D); Presence of clinical “red flags” (not reported); SSP clinical classification (not reported).<br><b>7 months (May 2011 – November 2011)</b><br>- Surgery rate (not reported); MRI utilization (not reported).                                                                                                                                                                                                                                                                                                                                                                                                                                                              |
|                                    | Wilgenbusch et al. (2014)(28)   | - Inclusion; New elective outpatient surgeon referrals for LBP and leg pain seen by 2 neurosurgeons.<br>- Exclusion: red flags.                                                                                                                                                                                                                                                                 | N= 215<br>- Group A: n=66<br>- Group B: n=149                                                                     | Patient (12 mo)<br>Organizational (12 mo)                         | <b>1 year (June 2011 – May 2012)</b><br>- Disability (ODI); Back and leg pain (VAS); Number of patients with SSPc patterns; Health-related quality of life (EQ-5D-5L).<br><b>1 year (June 2011 – May 2012)</b><br>- Number of referrals to surgery; Wait time for surgeon assessment; Wait time for MRI.                                                                                                                                                                                                                                                                                                                                                                                                                                                                                                     |
| <b>Back pain Assessment Clinic</b> | Moi et al. (2018)(29)           | - <b>Inclusion:</b> ≥18 years, referrals for neck or LBP, with or without limb symptoms, already on outpatient spinal surgical waiting lists, triaged as ‘non-urgent’ or assigned a ‘next available’ appointment by neurosurgery and orthopaedic spinal units. Low likelihood of surgical intervention.<br>- <b>Exclusion:</b> red flags, spinal surgery within the last 2 years, radiculopathy | N=522<br>- Qualitative study: N=94<br>(Patients n=54; Health professionals and managers n=14; and referrers n=26) | Patient (12 weeks)<br>Organizational (12 weeks)<br>Implementation | <b>After a 12-week rehabilitation programme</b><br>- Pain [Brief Pain Inventory (BPI) short form]; Disability [(ODI) or Neck Disability Index (NDI)]; Overall well-being [Global Improvement Scale].<br><b>After a 12-week rehabilitation programme</b><br>- Patient satisfaction (survey); Waiting times (survey) - time from referral to initial consultation, patients redirected from neurosurgery waiting lists, patients redirected from orthopaedic waiting lists; Appropriate and safe care (survey) – medication adjustments, spinal injections, MRI utilization, referrals to community-based spinal rehabilitation, referrals to specialist services, discharges, GP satisfaction; Efficiency and sustainability (survey) – Costs/patient, cost-savings.<br><b>1 year (July 2014 – June 2015)</b> |

1  
2  
3  
4  
5  
6  
7  
8  
9  
10  
11  
12  
13  
14  
15  
16  
17  
18  
19  
20  
21  
22  
23  
24  
25  
26  
27  
28  
29  
30  
31  
32  
33  
34  
35  
36  
37  
38  
39  
40  
41  
42  
43  
44  
45  
46

|  |                                                                                                                                                                                                                                   |  |                |                                                                                                                                                                                                                                                                    |
|--|-----------------------------------------------------------------------------------------------------------------------------------------------------------------------------------------------------------------------------------|--|----------------|--------------------------------------------------------------------------------------------------------------------------------------------------------------------------------------------------------------------------------------------------------------------|
|  | <p>accompanied by limb weakness, moderate-to-severe scoliosis, peripheral entrapment neuropathies, high likelihood of need for surgical intervention, comorbidities, referred for medicolegal opinions or compensable claims.</p> |  | <p>(12 mo)</p> | <p>- Victorian Innovation Reform Impact Assessment Framework domains (BAC activity audit, patient surveys and stakeholders' interviews) – Access to care, Appropriate and safe care, Workforce optimization and integration and Efficiency and sustainability.</p> |
|--|-----------------------------------------------------------------------------------------------------------------------------------------------------------------------------------------------------------------------------------|--|----------------|--------------------------------------------------------------------------------------------------------------------------------------------------------------------------------------------------------------------------------------------------------------------|

**Abbreviations:**  
 BAC – Back pain Assessment Clinic; CAM - Complementary and Alternative Medicine; CRPE - Clinical Reasoning and Process Evaluation; EHR – Electronic Health Record; GP – General Practitioner; ISAEC – Inter-professional Spine Assessment and Education Clinics; LBP – Low Back Pain; MoC – Model of Care; MRI – Magnetic Resonance Imaging; NERBPP – North East Low Back and Radicular Pain Pathway; NHS – National Health System; PCP – Primary Care Provider; PHC – Primary Healthcare; PHRR - Public Healthcare Regional Registry; PIPT - Psychologically Informed Physical Therapy; PT – Physiotherapy; PTs – Physiotherapists; QALYs – quality-adjusted life years; RCT – Randomized controlled trial; SBST – Start Back Screening Tool; SSP – Saskatchewan Spine Pathway;

For peer review only

## Additional File 5 – Core components of the MoCs

| MoC        | Study                   | Referral                                                                                           | Assessment                                                                     | Health Interventions                                                                                                                                                                                                                                                                                                                                                                                                                                                                                                                                                                                                                                                                      | Follow-up                                                                                                                                                                                                                                                                                                            | Discharge                                                                                                                                                                                                       |
|------------|-------------------------|----------------------------------------------------------------------------------------------------|--------------------------------------------------------------------------------|-------------------------------------------------------------------------------------------------------------------------------------------------------------------------------------------------------------------------------------------------------------------------------------------------------------------------------------------------------------------------------------------------------------------------------------------------------------------------------------------------------------------------------------------------------------------------------------------------------------------------------------------------------------------------------------------|----------------------------------------------------------------------------------------------------------------------------------------------------------------------------------------------------------------------------------------------------------------------------------------------------------------------|-----------------------------------------------------------------------------------------------------------------------------------------------------------------------------------------------------------------|
| START BACK | (1,2)<br>STaRT<br>Back  | GP, practice nurse or the local Physiotherapy Direct Access service (Physio Direct) referral to PT | PT assessment and risk stratification (SBST)                                   | <p>PTs deliver risk-matched group care:</p> <ul style="list-style-type: none"> <li>- All risk groups: Education + booklet <i>The Back Book</i> + video “Get Back Active”;</li> <li>- Low risk: Single session (30 minutes) of minimal intervention (education + advice + reassurance);</li> <li>- Medium risk: 30-minute session of education + standardized PT (exercise + manual therapy);</li> <li>- High risk: Education + PIPT (CBT with traditional PT)</li> </ul>                                                                                                                                                                                                                  | - Patients are advised to access their GP for ongoing care in the usual way or if their condition worsens.                                                                                                                                                                                                           | <ul style="list-style-type: none"> <li>- Low risk: after the initial education session;</li> <li>- Medium risk: after a maximum of 6 sessions;</li> <li>- High risk: after a maximum of 12 sessions.</li> </ul> |
|            | (3,4)<br>IMPACT<br>Back | GPs referral to PT                                                                                 | GP risk stratification (SBST) + PT assessment of medium and high-risk patients | <p>GPs deliver care to:</p> <ul style="list-style-type: none"> <li>- Low risk: Single session of minimal intervention (education + reassurance + information on self-management). Pain medication if appropriate;</li> </ul> <p>PTs deliver risk-matched group care:</p> <ul style="list-style-type: none"> <li>- Medium risk: education + standardized PT (exercise + manual therapy);</li> <li>- High risk: education + PIPT (CBT with traditional PT)</li> </ul>                                                                                                                                                                                                                       | - If needed, medium and high-risk patients referred for further investigations or secondary care.                                                                                                                                                                                                                    | <ul style="list-style-type: none"> <li>- Low risk: after the initial education session;</li> <li>- Medium risk: after a maximum of 6 sessions;</li> <li>- High risk: after a maximum of 12 sessions.</li> </ul> |
|            | (5)<br>Ireland          | GP or PT team refer to the Back Pain Clinic                                                        | PT assessment and risk stratification (SBST)                                   | <p>PTs deliver risk-matched group care:</p> <ul style="list-style-type: none"> <li>- Low risk: 1.5-hour small group session of education + exercise to promote active self-management;</li> <li>- Medium risk: Four 90-minute group sessions (8-10 patients) of education + generic exercise over 4 weeks;</li> <li>- High risk: Four 120-minute group sessions (4-6 patients) of exercise (as medium risk group) + problem solving approach + CBT to promote self-management</li> </ul>                                                                                                                                                                                                  | Not reported                                                                                                                                                                                                                                                                                                         | <ul style="list-style-type: none"> <li>- Low risk: after the initial education session;</li> <li>- Medium risk: after 12 weeks;</li> <li>- High risk: after 12 weeks.</li> </ul>                                |
|            | (6)<br>Denmark          | GPs referral to PT                                                                                 | GPs assessment + PT assessment and risk stratification (SBST)                  | <p>PTs deliver risk-matched group care:</p> <ul style="list-style-type: none"> <li>- All risk groups: Education (education + advice + reassurance + booklet similar to <i>The Back Book</i>)</li> <li>- Low-risk: minimal intervention (education + advice + reassurance)</li> <li>- Medium risk: individualized PT treatment + intervention focusing prevention of new LBP episodes</li> <li>- High risk: individualized PIPT (CBT and/or behavioural techniques with traditional PT)</li> </ul>                                                                                                                                                                                         | Not reported                                                                                                                                                                                                                                                                                                         | Not reported                                                                                                                                                                                                    |
| SCOPiC     | (7-9)                   | GP or other HCP refer to the SCOPiC sciatica clinic                                                | PT assessment and risk stratification (SBST)                                   | <p>PTs deliver risk-matched group care:</p> <ul style="list-style-type: none"> <li>- Subgroup 1 (low risk): 30-minute sessions (advice + education + self-management support + sciatica booklet)</li> <li>- Subgroup 2 (medium risk with score <math>\leq 3</math> or high risk with score <math>\leq 2</math>): one 45-minute session + 30-minute sessions of individualised treatment (advice + reassurance + education + exercise + manual therapy + acupuncture + sciatica booklet)</li> <li>- Subgroup 3 (medium risk with score =4 or high risk with score <math>\geq 3</math>): Referral to a fast-track care pathway at the primary/secondary care interface services.</li> </ul> | <ul style="list-style-type: none"> <li>- Subgroups 1 and 2: Patients are able to access other care via their GP.</li> <li>- Subgroup 3: specialist spinal PT assessment + referral to imaging (MRI or alternative) + referral to specialist clinics services (orthopaedics, neurosurgery or pain clinic).</li> </ul> | <ul style="list-style-type: none"> <li>- Subgroup 1: after up to 2 sessions within 4 weeks;</li> <li>- Medium risk: after up to 6 sessions within 6 to 12 weeks;</li> <li>- High risk: not reported</li> </ul>  |

|                                     |                  |                                                                                                      |                                                                                                                        |                                                                                                                                                                                                                                                                                                                                                                                                                                    |                                                                                                                                                                                                                                                                                                                                                                         |                                                                                             |
|-------------------------------------|------------------|------------------------------------------------------------------------------------------------------|------------------------------------------------------------------------------------------------------------------------|------------------------------------------------------------------------------------------------------------------------------------------------------------------------------------------------------------------------------------------------------------------------------------------------------------------------------------------------------------------------------------------------------------------------------------|-------------------------------------------------------------------------------------------------------------------------------------------------------------------------------------------------------------------------------------------------------------------------------------------------------------------------------------------------------------------------|---------------------------------------------------------------------------------------------|
| MATCH                               | (10,11)          | PCPs referral:<br>- Medium risk patients to PT or CAM<br>- High-risk patients to psychologist and PT | PCP assessment and risk stratification (SBST)                                                                          | PCPs deliver care to:<br>- Low risk: Reassurance + self-management recommendations + online DVDs<br>PTs or CAM professionals deliver care to:<br>- Moderate risk: Self-management recommendations + PT-led exercise and yoga. For patients not interested these treatments, refer to passive options (acupuncture, chiropractic or massage)<br>PTs and psychologists:<br>- High risk: PIPT and CBT (access to CBT is very limited) | Low and medium risk patients: Not reported<br>High-risk patients: Proactive follow-up within 2 weeks by PCPs                                                                                                                                                                                                                                                            | Not reported                                                                                |
| TARGET                              | (12–14)          | PCPs referral to PIPT                                                                                | PCP assessment and risk stratification (2-item Chronic Low Back Pain Questionnaire + SBST for patients in acute stage) | - PCPs deliver education and pain medication to high-risk patients<br>- PTs deliver PIPT (cognitive behavioural training, motivational interviewing, pain-coping skills and activity-based treatments that include graded activity and graded exposure)                                                                                                                                                                            | Not reported.                                                                                                                                                                                                                                                                                                                                                           | Not reported.<br>There are no limits placed on the duration of any therapies or treatments. |
| BETTERBACK®                         | (15–18)          | - Self-referral to the PHC PT rehabilitation clinics<br>- Referral from the PHC general practices    | PT assessment and risk stratification (SBST)                                                                           | PTs deliver treatment matched to functional impairments based on SBST results (BetterBack part 1):<br>- Individualised information + neuromusculoskeletal mobilisation techniques if indicated + exercise + patient education (brochure):<br>- Low-risk: 1-3 sessions<br>- Medium-risk: ≥4 sessions<br>- High-risk: ≥4 sessions with additional training + education with a behavioural approach.                                  | PT assessment and evaluation of treatment outcomes – if needed PT group based-care (BetterBack part 2):<br>- Group-based education: One 90-minute session (2-10 patients)<br>- Group training (6 weeks, 2x/week): graded training of posture, motor control and, if needed, range of movement exercises                                                                 | Not reported                                                                                |
| Low Back and Radicular Pain Pathway | (19,20) National | GP, self-referral to a chiropractor, osteopath or PT and 111 telephone service                       | GP, chiropractor, osteopath or PT assessment and risk stratification (SBST)                                            | GP, chiropractor, osteopath or PT initial management:<br>- Advice + information + pain medication + PT core therapies (education + manual therapy + exercise) with a 2-week review.<br>- If no improvement, referral to TTP assessment + referral to imaging (if indicated) within 6 weeks.                                                                                                                                        | - If imaging concordant with structural cause of sciatica, referral to epidural injection or surgery (after 8-12 weeks)<br>- If non-concordant structural cause, referral to CPPP (12-18 weeks)<br>- If no improvement, referral to Specialist Pain Management Services (18 weeks) - Pain management programmes (physical, psychological and behavioural interventions) | Patients can be discharged at any point along the pathway upon improvement of the LBP.      |
|                                     | (21) North       | GP referral or other first contact professional                                                      | GP or other first contact professional assessment and risk stratification (SBST)                                       | GP or other first contact professional initial management:<br>- Advice on self-management or referral to secondary care or referral to TTP<br>- If referral to TTP: assessment + referral to a combination of core therapies (education + manual therapy + exercise) or intensive CPPP (residential programme of intensive exercise + education + support with long-term self-management)                                          | - If not improved, referral for Pain Management Services and specialist spinal surgical options                                                                                                                                                                                                                                                                         | - After initial management<br>- After treatments: not reported                              |

|                                     |                          |                                                        |                                                                                              |                                                                                                                                                                                                                                                                                                                                                                                                                                                                                                                                                                                                                         |                                                                                                                                                                                                                                                                                                            |                                                                                                                                  |
|-------------------------------------|--------------------------|--------------------------------------------------------|----------------------------------------------------------------------------------------------|-------------------------------------------------------------------------------------------------------------------------------------------------------------------------------------------------------------------------------------------------------------------------------------------------------------------------------------------------------------------------------------------------------------------------------------------------------------------------------------------------------------------------------------------------------------------------------------------------------------------------|------------------------------------------------------------------------------------------------------------------------------------------------------------------------------------------------------------------------------------------------------------------------------------------------------------|----------------------------------------------------------------------------------------------------------------------------------|
|                                     | (22,23)<br>North<br>East | GP referral                                            | GP risk stratification (SBST) + referral to TTP                                              | GP deliver care to low-risk patients:<br>- Low risk: advice + education<br>TTP assessment and delivery of risk-matched group care:<br>- Referral to further investigations if necessary;<br>- Moderate to high risk: Core therapies (PT incorporating exercise, manual therapy or acupuncture) or CPPP (100-hour residential, combined physical and psychological therapies program for a small number of patients)                                                                                                                                                                                                     | Not reported                                                                                                                                                                                                                                                                                               | - Low-risk patients: after initial consultation                                                                                  |
| <b>Beating Back Pain Service</b>    | (24)                     | GP, PT or osteopath referral to BBPS                   | No assessment before group session                                                           | GP and occupational therapist deliver care to all patients<br>- 2h group session of education on pain and self-management + BBPS pack (booklet + CD with information and mobility and strength exercises) + SBST assessment + referral to combination of care according to patient preference (individualized combination of acupuncture, self-management groups and/or BBPS packs):<br>- Acupuncture: Up to 6 weekly sessions (30 minutes) of individualized TCM acupuncture treatment;<br>- Self-management groups: group sessions of education on self-management + goal setting + mindfulness + CBT.<br>- BBPS pack | Not reported                                                                                                                                                                                                                                                                                               | Not reported                                                                                                                     |
| <b>North East Essex PCT service</b> | (25)                     | GP referral to the manual therapy service              | GP assessment                                                                                | - GP deliver usual care (advice + reassurance + analgesia) to all patients for 4-6 weeks + referral to chiropractor/osteopath/PT according to patient preference.<br>- Chiropractor/Osteopath/PT care: Up to 6 sessions of manual therapy or additional treatments with GP approval                                                                                                                                                                                                                                                                                                                                     | If no improvements, referral to psychotherapy/CBT or referral to secondary care via GP recommendation (surgical/ radiological/ pain consultant)                                                                                                                                                            | - Discharge and referral back to GP after chiropractor/Osteopath/PT care with a report of recommendations for further management |
| <b>ISAEC</b>                        | (26)                     | PCP referral to ISAEC (could order MRI)                | APC evaluation and stratification by pattern diagnosis                                       | APC deliver care according to clinical presentation patterns:<br>- Back dominant pattern (surgery unlikely): APC education and management (Physiatry/pain clinic, counselling, rheumatology, self-management, allied health management)<br>- Leg dominant (surgery likely): referral to spine surgeon (imaging, blocks, surgery, nonoperative)                                                                                                                                                                                                                                                                          | - Back dominant pattern (surgery unlikely): recommendations communicated to referring PCP.<br>- Leg dominant (surgery likely): APC education and management (Physiatry/pain clinic, counselling, rheumatology, self-management, allied health management) + recommendations communicated to referring PCP. | Not reported                                                                                                                     |
| <b>Saskatchewan Spine Pathway</b>   | (27)                     | Physician referral to SSP clinic                       | Patients triage into Group A (non-surgical management) or Group B (spine surgeon assessment) | - Group A: education including self-care instruction, medication advice and/or mechanical therapies<br>- Group B – surgical consultation (imaging and surgery)                                                                                                                                                                                                                                                                                                                                                                                                                                                          | - Group A: follow-up by the SSP clinic when required                                                                                                                                                                                                                                                       | - Group A: Discharge after care delivery<br>- Group B: Not reported                                                              |
|                                     | (28)                     | - Group A: Referred by neurosurgeons at the SSP clinic | Physicians (at PHC) or specialized PTs (at SSP clinics) assessment                           | - Group A (SSP clinic): assessment (directly) or reassessment (from PHC referral) of pattern diagnosis + treatment according to SSP classification (pattern diagnosis). If patient improves, continue treatment in PHC.                                                                                                                                                                                                                                                                                                                                                                                                 | Group A: If no improvement:<br>- Pattern 1 e 2 – Refer back to PHC with recommendations for additional mechanical treatment and referral to                                                                                                                                                                | Not reported                                                                                                                     |



|                             |      |                                                                     |                                                                                  |                                                                                                                                                                                                                                                                                                                          |                                                                                                                                                                                                                                                                                                   |                                                                                                                                                         |
|-----------------------------|------|---------------------------------------------------------------------|----------------------------------------------------------------------------------|--------------------------------------------------------------------------------------------------------------------------------------------------------------------------------------------------------------------------------------------------------------------------------------------------------------------------|---------------------------------------------------------------------------------------------------------------------------------------------------------------------------------------------------------------------------------------------------------------------------------------------------|---------------------------------------------------------------------------------------------------------------------------------------------------------|
|                             |      | - Group B: Referred by physicians at primary care                   | If red flags present, referral for emergency (imaging + surgery consultation)    | - Group B (PHC referral): treatment according to SSP classification in PHC.<br><br>Treatment according to SSP classification:<br>- Pattern 1, 2 and 4: Reassurance + Advice and Information + Treatment schedule (position, movement, pharmacology and adjunct therapies)<br>- Pattern 3: Similar, but exclude exercise. | surgery if symptoms persist after 6 months;<br>- Pattern 3 – Urgent referral for imaging + surgery consultation if pain persist after 6 weeks;<br>- Pattern 4 – Non-urgent referral for imaging + surgery consultation.<br><br>Group B (PHC referral): If no improvement, referral to SSP clinic. |                                                                                                                                                         |
| Back pain Assessment Clinic | (29) | GP referral to Royal Melbourne Hospital + Surgeon’s referral to BAC | Rheumatologist, neurosurgeon, orthopaedic spinal surgeon or APP (PTs) assessment | If BAC consultation:<br>- Referral to community treatment services (12-week community-based spinal rehabilitation programme seen within 2–4 weeks)<br>- Referral to rheumatology, orthopaedics, neurosurgery or pain services                                                                                            | - Outpatient specialist clinics (Rheumatology, Orthopaedics, Neurosurgery, Pain services)                                                                                                                                                                                                         | - To initial referrer after BAC assessment;<br>- After orthopaedics or neurosurgery consultations<br>- After community treatment services: Not reported |

**Abbreviations:**

APC - Advanced Practice Clinician; APP - Advanced Practice Physiotherapist; BAC – Back pain Assessment Clinic; BBPS – Beating Back Pain Service; CAM - Complementary and Alternative Medicine; CBT – Cognitive Behavioural Techniques; CCCP - Combined Physical and Psychological Therapies program; EBP – Evidence-Based Practice; GPs – General Practitioner; HCP – Health Care Provider; ISAEC – Inter-professional Spine Assessment and Education Clinics; LBP – Low Back Pain; MoC – Model of Care; NERBPP – North East Low Back and Radicular Pain Pathway; PCP – Primary Care Provider; PHC – Primary Healthcare; PIPT - Psychologically Informed Physical Therapy; PT – Physiotherapy; PTs – Physiotherapists; SBST – Start Back Screening Tool; SSP – Saskatchewan Spine Pathway; TCM – Traditional Chinese Medicine; TTPs - Triage and Treat practitioners;
