# Supplementary material for: Low back pain management in primary healthcare: findings from a scoping review on models of care
Source: PubMed Central journal article supplement — BMJ Open. 2024 May 15;14(5):e079276. doi: 10.1136/bmjopen-2023-079276 (PMC11097853; doi:10.1136/bmjopen-2023-079276), 2024-05-15
Supplement: bmjopen-2023-079276supp002.pdf [file bmjopen-2023-079276supp002.pdf]

**MEDLINE (Pubmed) – January 13<sup>th</sup>, 2022**

| Search                                                         | Query                                                                                                                                                                                                                                                                                                                                                                                                                                                                                                                                                                                                                                                                                                                                                                                                                                                                                                                                                                                                                                                                                                                                                                                                                                                                                                                                                                                             | Records retrieved |
|----------------------------------------------------------------|---------------------------------------------------------------------------------------------------------------------------------------------------------------------------------------------------------------------------------------------------------------------------------------------------------------------------------------------------------------------------------------------------------------------------------------------------------------------------------------------------------------------------------------------------------------------------------------------------------------------------------------------------------------------------------------------------------------------------------------------------------------------------------------------------------------------------------------------------------------------------------------------------------------------------------------------------------------------------------------------------------------------------------------------------------------------------------------------------------------------------------------------------------------------------------------------------------------------------------------------------------------------------------------------------------------------------------------------------------------------------------------------------|-------------------|
| #1                                                             | ((“back pain” [MesH]) OR (“back pain” [tiab]) OR (“low-back pain” [MesH]) OR (“low back pain” [tiab]) OR (“sciatica” [MesH]) OR (“sciatica neuropathy” [MesH]) OR (“sciatica” [tiab]) OR (“backache” [tiab]) OR (“back ache” [tiab]) OR (“lumb* pain” [tiab]) OR (“lumbago” [tiab]) OR (“spinal pain” [tiab]) OR (“spondylosis” [tiab]) OR (“back disorder” [tiab]))                                                                                                                                                                                                                                                                                                                                                                                                                                                                                                                                                                                                                                                                                                                                                                                                                                                                                                                                                                                                                              | 91 347            |
| #2                                                             | ((“Models, Organizational”[MesH]) OR ((theor*[tiab] OR concept*[tiab] OR framework*[tiab] OR model*[tiab] OR program*[tiab] OR approach*[tiab])) AND ((“critical pathways”[MeSH] OR “model of care”[tiab] OR “care model”[tiab] OR “functional integration”[tiab] OR “clinical integration”[tiab] OR “case management”[MeSH] OR “delivery of health care, integrated”[MeSH] OR “disease management”[MeSH] OR “patient care management”[MeSH] OR “patient-centered care”[MeSH] OR “continuity of patient care”[MeSH] OR “comprehensive health care”[MeSH] OR “managed care program”[tiab] OR “multidisciplinary care”[tiab] OR “interdisciplinary care”[tiab] OR “inter-disciplinary care”[tiab] OR “cross disciplinary care”[tiab] OR “cross-disciplinary care”[tiab] OR “multiple interventions”[tiab] OR “care chain”[tiab] OR “care chains”[tiab] OR “care continuity”[tiab] OR “care continuation”[tiab] OR “care transition”[tiab] OR “chain of care”[tiab] OR “continuity of care”[tiab] OR “cross sectoral care”[tiab] OR “integrated health care”[tiab] OR “integrated medicine”[tiab] OR “integrated social network”[tiab] OR “integration of care”[tiab] OR “intersectoral care”[tiab] OR “linked care”[tiab] OR “management model”[tiab] OR “service network”[tiab] OR “transition of care”[tiab] OR “transitional care”[tiab] OR “transmural care”[tiab] OR “holistic care”[tiab])))) | 384 556           |
| #3                                                             | ("primary health care"[MeSH] OR (("primary"[tiab] AND "health"[tiab]) AND "care"[tiab])) OR ("primary health care"[tiab] OR ("primary"[tiab] AND "care"[tiab]) OR "primary care"[tiab])) OR (("general practice"[MeSH] OR ("general"[tiab] AND "practice"[tiab]) OR "general practice"[tiab])) OR ("general"[tiab] AND "medicine"[tiab]) OR "general medicine"[tiab]) OR ("family practice"[MeSH] OR ("family"[tiab] AND "practice"[tiab]) OR "family practice"[tiab])) OR ("family"[tiab] AND "medicine"[tiab]) OR "family medicine"[tiab]) OR (("primaries"[tiab] OR "primary"[tiab] AND "servic*" [tiab])                                                                                                                                                                                                                                                                                                                                                                                                                                                                                                                                                                                                                                                                                                                                                                                      | 597 247           |
| #4                                                             | #1 AND #2 AND #3                                                                                                                                                                                                                                                                                                                                                                                                                                                                                                                                                                                                                                                                                                                                                                                                                                                                                                                                                                                                                                                                                                                                                                                                                                                                                                                                                                                  | 854               |
| <b>Limited to: since 2000, English, Portuguese and Spanish</b> |                                                                                                                                                                                                                                                                                                                                                                                                                                                                                                                                                                                                                                                                                                                                                                                                                                                                                                                                                                                                                                                                                                                                                                                                                                                                                                                                                                                                   | 731               |

**EMBASE – December 3<sup>rd</sup> 2022**

| Search | Query                                                                                                                                                                                                                                                                                                                                                                                                                                                                                                                                                                                                                                                          | Records retrieved |
|--------|----------------------------------------------------------------------------------------------------------------------------------------------------------------------------------------------------------------------------------------------------------------------------------------------------------------------------------------------------------------------------------------------------------------------------------------------------------------------------------------------------------------------------------------------------------------------------------------------------------------------------------------------------------------|-------------------|
| #1     | ('backache'/exp OR 'sciatica'/exp OR 'spondylosis'/exp) AND ('nonbiological model'/exp OR 'disease management'/exp OR 'holistic care'/exp OR 'patient care'/exp OR 'transitional care'/exp OR 'interdisciplinary care'/exp OR 'case management'/exp OR 'multidisciplinary care'/exp OR 'disease management program'/exp) AND ('primary health care'/exp OR 'general practice'/exp) AND ([english]/lim OR [portuguese]/lim OR [spanish]/lim) AND [2000-2022]/py AND ([article]/lim OR [article in press]/lim OR [data papers]/lim OR [editorial]/lim OR [erratum]/lim OR [letter]/lim OR [note]/lim OR [review]/lim OR [short survey]/lim OR [preprint]/lim) OR | 1103              |

('back pain' OR 'low-back pain' OR 'low back pain' OR 'sciatica neuropathy' OR 'sciatica' OR 'backache' OR 'back ache' OR 'lumb\* pain' OR 'lumbago' OR 'spinal pain' OR 'spondylosis' OR 'back disorder')

**AND**

('models,organizational' OR theor\* OR concept\* OR framework\* OR model\* OR program\* OR approach\*) AND ('critical pathways' OR 'model of care' OR 'care model' OR 'functional integration' OR 'clinical integration' OR 'case management' OR 'delivery of health care, integrated' OR 'disease management' OR 'patient care management' OR 'patient-centered care' OR 'continuity of patient care' OR 'comprehensive health care' OR 'managed care program\*' OR 'multidisciplinary care' OR 'interdisciplinary care' OR 'inter-disciplinary care' OR 'cross disciplinary care' OR 'cross-disciplinary care' OR 'multiple interventions' OR 'care chain' OR 'care chains' OR 'care continuity' OR 'care continuation' OR 'care transition\*' OR 'chain of care' OR 'continuity of care' OR 'cross sectoral care' OR 'integrated health care' OR 'integrated medicine' OR 'integrated social network\*' OR 'integration of care' OR 'intersectoral care' OR 'linked care' OR 'management model' OR 'service network\*' OR 'transition of care' OR 'transitional care' OR 'transmural care' OR 'holistic care')

**AND** (((((primary AND health AND care OR primary) AND care OR general) AND practice OR general) AND medicine OR family) AND practice OR family) AND medicine **AND** [2000-2022]/py AND ([english]/lim OR [portuguese]/lim OR [spanish]/lim)

#### Cochrane Central Register of Controlled Trials (CENTRAL) – December 3<sup>rd</sup> 2022

| Search | Query                                                                                                                                                                                                                                                                                                                                                                                                                                                                                                                                                                                                                                                                                                                                                                                                                                                                                                                  | Records retrieved |
|--------|------------------------------------------------------------------------------------------------------------------------------------------------------------------------------------------------------------------------------------------------------------------------------------------------------------------------------------------------------------------------------------------------------------------------------------------------------------------------------------------------------------------------------------------------------------------------------------------------------------------------------------------------------------------------------------------------------------------------------------------------------------------------------------------------------------------------------------------------------------------------------------------------------------------------|-------------------|
| #1     | MeSH low back pain - explode all                                                                                                                                                                                                                                                                                                                                                                                                                                                                                                                                                                                                                                                                                                                                                                                                                                                                                       | 4317              |
| #2     | MeSH back pain - explode all                                                                                                                                                                                                                                                                                                                                                                                                                                                                                                                                                                                                                                                                                                                                                                                                                                                                                           | 5503              |
| #3     | MeSH lumbosacral region - explode all                                                                                                                                                                                                                                                                                                                                                                                                                                                                                                                                                                                                                                                                                                                                                                                                                                                                                  | 513               |
| #4     | (back pain):ti,ab OR (low-back pain):ti,ab OR (low back pain):ti,ab OR sciatica:ti,ab OR (sciatic neuropathy):ti,ab OR backache:ti,ab OR (back ache):ti,ab OR (lumbar pain):ti,ab OR lumbago:ti,ab OR (spinal pain):ti,ab OR spondylosis:ti,ab OR (back disorder):ti,ab                                                                                                                                                                                                                                                                                                                                                                                                                                                                                                                                                                                                                                                | 28822             |
| #5     | {OR #1-#4}                                                                                                                                                                                                                                                                                                                                                                                                                                                                                                                                                                                                                                                                                                                                                                                                                                                                                                             | <b>29452</b>      |
| #6     | MeSH models, organizational - explode all                                                                                                                                                                                                                                                                                                                                                                                                                                                                                                                                                                                                                                                                                                                                                                                                                                                                              | 180               |
| #7     | (theor*):ti,ab OR (concept*):ti,ab OR (framework*):ti,ab OR (model*):ti,ab OR (approach*):ti,ab                                                                                                                                                                                                                                                                                                                                                                                                                                                                                                                                                                                                                                                                                                                                                                                                                        | 238742            |
| #8     | #6 OR #7                                                                                                                                                                                                                                                                                                                                                                                                                                                                                                                                                                                                                                                                                                                                                                                                                                                                                                               | <b>238768</b>     |
| #9     | MeSH critical pathways – explode all                                                                                                                                                                                                                                                                                                                                                                                                                                                                                                                                                                                                                                                                                                                                                                                                                                                                                   | 205               |
| #10    | MeSH case management – explode all                                                                                                                                                                                                                                                                                                                                                                                                                                                                                                                                                                                                                                                                                                                                                                                                                                                                                     | 718               |
| #11    | MeSH delivery of health care - explode all                                                                                                                                                                                                                                                                                                                                                                                                                                                                                                                                                                                                                                                                                                                                                                                                                                                                             | 48924             |
| #12    | MeSH disease management - explode all                                                                                                                                                                                                                                                                                                                                                                                                                                                                                                                                                                                                                                                                                                                                                                                                                                                                                  | 5229              |
| #13    | MeSH patient care management - explode all                                                                                                                                                                                                                                                                                                                                                                                                                                                                                                                                                                                                                                                                                                                                                                                                                                                                             | 26892             |
| #14    | MeSH patient-centered care - explode all                                                                                                                                                                                                                                                                                                                                                                                                                                                                                                                                                                                                                                                                                                                                                                                                                                                                               | 818               |
| #15    | MeSH continuity of patient care - explode all                                                                                                                                                                                                                                                                                                                                                                                                                                                                                                                                                                                                                                                                                                                                                                                                                                                                          | 27999             |
| #16    | MeSH comprehensive health care - explode all                                                                                                                                                                                                                                                                                                                                                                                                                                                                                                                                                                                                                                                                                                                                                                                                                                                                           | 11355             |
| #17    | {OR #9-#16}                                                                                                                                                                                                                                                                                                                                                                                                                                                                                                                                                                                                                                                                                                                                                                                                                                                                                                            | <b>84746</b>      |
| #18    | (model of care):ti,ab OR (care model):ti,ab OR (multidisciplinary care):ti,ab OR (interdisciplinary care):ti,ab OR (inter-disciplinary care):ti,ab OR (cross disciplinary care):ti,ab OR (cross-disciplinary care):ti,ab OR (multiple interventions):ti,ab OR (care chain):ti,ab OR (care continuity):ti,ab OR (care continuation):ti,ab OR (care transition):ti,ab OR (chain* of care):ti,ab OR (continuity of care):ti,ab OR (cross sectoral care):ti,ab OR (integrated health care):ti,ab OR (integrated medicine):ti,ab OR (integrated social network):ti,ab OR (integration of care):ti,ab OR (intersectoral care):ti,ab OR (linked care):ti,ab OR (management model):ti,ab OR (service network) OR (transition of care):ti,ab OR (transitional care):ti,ab OR (transmural care):ti,ab OR (holistic care):ti,ab OR (functional integration):ti,ab OR (clinical integration):ti,ab OR (managed care program):ti,ab | 48372             |

|                                       |                                                                                                                                                                                                                                |            |
|---------------------------------------|--------------------------------------------------------------------------------------------------------------------------------------------------------------------------------------------------------------------------------|------------|
| #19                                   | #6 OR (#7 AND (#17 OR #18))                                                                                                                                                                                                    | 107093     |
| #20                                   | MeSH primary health care - explode all                                                                                                                                                                                         | 8157       |
| #21                                   | MeSH general practice - explode all                                                                                                                                                                                            | 2494       |
| #22                                   | MeSH family practice - explode all                                                                                                                                                                                             | 1980       |
| #23                                   | (primary health care):ti,ab OR (primary healthcare):ti,ab OR (primary care):ti,ab OR (general practice):ti,ab OR (general medicine):ti,ab OR (family practice):ti,ab OR (family medicine):ti,ab OR (primar* AND servic*):ti,ab | 10793      |
| #24                                   | {OR #20-#23}                                                                                                                                                                                                                   | 110252     |
| #25                                   | #5 AND #19 AND #24                                                                                                                                                                                                             | 590        |
| <b>Limits to: Jan 2000 – Dec 2022</b> |                                                                                                                                                                                                                                | <b>575</b> |

**PEDro – December 2<sup>nd</sup> 2022**

| Search | Query                                                                                                                                                                                                                                                               | Records retrieved |
|--------|---------------------------------------------------------------------------------------------------------------------------------------------------------------------------------------------------------------------------------------------------------------------|-------------------|
| #1     | Abstract & Title= (primary care model of care)<br>Problem= (pain)<br>Body Part= (lumbar spine, sacro-iliac joint or pelvis)<br>Subdiscipline= (musculoskeletal)<br>Method= (clinical trial)<br>Published since=2000<br>When Searching: Match all search terms (AND) | 30                |

**SCOPUS – December 3<sup>rd</sup> 2022**

| Search                                                  | Query                                                                                                                                                                                                                                                                                                                                                                                                                                                                                                                                                                                                                                                                                                                                                                                                                                                                                                                                                                                                                                                                                                                                                                                                                                                                                                                                                                                                                                                                                                                                                                                                                                                                                                                                                                                   | Records retrieved |
|---------------------------------------------------------|-----------------------------------------------------------------------------------------------------------------------------------------------------------------------------------------------------------------------------------------------------------------------------------------------------------------------------------------------------------------------------------------------------------------------------------------------------------------------------------------------------------------------------------------------------------------------------------------------------------------------------------------------------------------------------------------------------------------------------------------------------------------------------------------------------------------------------------------------------------------------------------------------------------------------------------------------------------------------------------------------------------------------------------------------------------------------------------------------------------------------------------------------------------------------------------------------------------------------------------------------------------------------------------------------------------------------------------------------------------------------------------------------------------------------------------------------------------------------------------------------------------------------------------------------------------------------------------------------------------------------------------------------------------------------------------------------------------------------------------------------------------------------------------------|-------------------|
| #1                                                      | TITLE-ABS-KEY(("back pain") OR ("back pain") OR ("low-back pain") OR ("low back pain") OR ("sciatica") OR ("sciatic neuropathy") OR ("sciatica") OR ("backache") OR ("back ache") OR ("lumbar pain") OR ("lumbago") OR ("spinal pain") OR ("spondylosis") OR ("back disorder")) AND TITLE-ABS-KEY(("model W/2 care" OR "care model") OR ((theor* OR concept* OR framework* OR model* OR program* OR approach*) AND ("critical path*" OR "care path*" OR "clinical path*" OR (delivery W/2 care) OR "functional integration" OR "clinical integration" OR "case management" OR "managed care" OR "Patient care plan" OR "integrated delivery system*" OR "integrated care" OR "disease N2 management" OR "care management" OR "care management" OR (comprehensive W/2 care) OR (comprehensive W/2 health*care) OR "Patient*Cent*red Care" OR "Patient Focused Care" OR (continuity W/2 care) OR (continuity W/2 *care) OR (continuum W/2 care) OR (multidisciplinary W/2 care) OR (inter*disciplinary W/2 care) OR ("cross*disciplinary" W/2 care) OR "multiple intervention" OR (care W/2 chain*) OR (care W/2 continuity) OR (care W/2 continuation) OR (*care W/2 transition) OR (chain AND w/2*care) OR (continuity W/2 care) OR "cross sectoral care" OR "integrated medicine" OR "integrated social network" OR (integrat* W/2 care) OR "intersectoral care" OR "linked care" OR (management W/2 model) OR (servic* W/2 network*) OR (transition W/2 care) OR (transitional W/2 care) OR (transmural W/2 care) OR (holistic W/2 care)))) AND TITLE-ABS-KEY((primary AND n3 AND care) OR "primary care" OR "primary health*care" OR "general practice" OR "general medicine" OR "family practice" OR "family medicine" OR (("primaries" OR "primary") AND (service* OR servicing))) | 231               |
| Limited to: since 2000, English, Portuguese and Spanish |                                                                                                                                                                                                                                                                                                                                                                                                                                                                                                                                                                                                                                                                                                                                                                                                                                                                                                                                                                                                                                                                                                                                                                                                                                                                                                                                                                                                                                                                                                                                                                                                                                                                                                                                                                                         |                   |

**Web of Science Core Collection – December 3<sup>rd</sup> 2022**

| Search | Query                                                                                                                                                           | Records retrieved |
|--------|-----------------------------------------------------------------------------------------------------------------------------------------------------------------|-------------------|
| #1     | ((("back pain") OR ("back pain") OR ("low-back pain") OR ("low back pain") OR ("sciatica") OR ("sciatica neuropathy") OR ("sciatica") OR ("backache") OR ("back | 176               |

ache”) OR (“lumb\* pain”) OR (“lumbago”) OR (“spinal pain”) OR (“spondylosis”) OR (“back disorder”)) (Topic)  
 AND  
 (“Models, Organizational”) OR ((“theor\* OR concept\* OR framework\* OR model\* OR program\* OR approach\*”) AND (“critical pathways” OR “model of care” OR “care model” OR “functional integration” OR “clinical integration” OR “case management” OR “delivery of health care, integrated” OR “disease management” OR “patient care management” OR “patient-centered care” OR “continuity of patient care” OR “comprehensive health care” OR “managed care program\*” OR “multidisciplinary care” OR “interdisciplinary care” OR “inter-disciplinary care” OR “cross disciplinary care” OR “cross-disciplinary care” OR “multiple interventions” OR “care chain” OR “care chains” OR “care continuity” OR “care continuation” OR “care transition\*” OR “chain of care” OR “continuity of care” OR “cross sectoral care” OR “integrated health care” OR “integrated medicine” OR “integrated social network\*” OR “integration of care” OR “intersectoral care” OR “linked care” OR “management model” OR “service network\*” OR “transition of care” OR “transitional care” OR “transmural care” OR “holistic care”))) (Topic)  
 AND  
 primary health care OR primary healthcare OR primary care OR general practice OR general medicine OR family practice OR family medicine (Topic)

**Grey Literature Report – December 2<sup>nd</sup> 2022**

| Search | Query                                                                                                                                                                                                                                                                                                                                                                                                                       | Records retrieved |
|--------|-----------------------------------------------------------------------------------------------------------------------------------------------------------------------------------------------------------------------------------------------------------------------------------------------------------------------------------------------------------------------------------------------------------------------------|-------------------|
| #1     | (“back pain” OR “low back pain” OR “sciatica” OR “lumbago” OR “backache”) AND (“model of care” OR “care model” OR “clinical pathway” OR “care pathway” OR “service delivery” OR “integrated care” OR “care management” OR “comprehensive care” OR “care chain”) AND (“Primary care” OR “primary healthcare” OR “primary health care” OR “general practice” OR “general medicine” OR “primary service” OR “family practice”) | 0                 |

**MedNar Search Engine – December 2<sup>nd</sup> 2022**

| Search | Query                                                                                                                                                                                                                                                                                                                                                                                                                                               | Records retrieved |
|--------|-----------------------------------------------------------------------------------------------------------------------------------------------------------------------------------------------------------------------------------------------------------------------------------------------------------------------------------------------------------------------------------------------------------------------------------------------------|-------------------|
| #1     | (“back pain” OR “low back pain” OR “sciatica” OR “lumbago” OR “backache”) AND (“model of care” OR “care model” OR “clinical pathway” OR “care pathway” OR “service delivery” OR “integrated care” OR “care management” OR “comprehensive care” OR “care chain”) AND (“Primary care” OR “primary healthcare” OR “primary health care” OR “general practice” OR “general medicine” OR “primary service” OR “family practice”) / From: 2000 / To: 2022 | 187               |

**World Health Organization Institutional Repository for Information Sharing (WHO-IRIS) – December 2<sup>nd</sup> 2022**

| Search | Query                                                                                                                                                                                                                                                                                                                                                                                                                                           | Records retrieved |
|--------|-------------------------------------------------------------------------------------------------------------------------------------------------------------------------------------------------------------------------------------------------------------------------------------------------------------------------------------------------------------------------------------------------------------------------------------------------|-------------------|
| #1     | (“model of care” OR “care model” OR “clinical pathway” OR “care pathway” OR “service delivery” OR “integrated care” OR “care management” OR “comprehensive care” OR “care chain”) AND (“Primary care” OR “primary healthcare” OR “primary health care” OR “general practice” OR “general medicine” OR “primary service” OR “family practice”) AND (“back pain” OR “low back pain” OR “sciatica” OR “lumbago” OR “backache”) / Date: 2000 - 2022 | 205               |
