# Supplementary material for: Low back pain management in primary healthcare: findings from a scoping review on models of care
Source: PubMed Central journal article supplement — BMJ Open. 2024 May 15;14(5):e079276. doi: 10.1136/bmjopen-2023-079276 (PMC11097853; doi:10.1136/bmjopen-2023-079276), 2024-05-15
Supplement: bmjopen-2023-079276supp005.pdf [file bmjopen-2023-079276supp005.pdf]

## Additional File 5 – Core components of the MoCs

| MoC        | Study                   | Referral                                                                                           | Assessment                                                                     | Health Interventions                                                                                                                                                                                                                                                                                                                                                                                                                                                                                                                                                                     | Follow-up                                                                                                                                                                                                                                                    | Discharge                                                                                                                                         |
|------------|-------------------------|----------------------------------------------------------------------------------------------------|--------------------------------------------------------------------------------|------------------------------------------------------------------------------------------------------------------------------------------------------------------------------------------------------------------------------------------------------------------------------------------------------------------------------------------------------------------------------------------------------------------------------------------------------------------------------------------------------------------------------------------------------------------------------------------|--------------------------------------------------------------------------------------------------------------------------------------------------------------------------------------------------------------------------------------------------------------|---------------------------------------------------------------------------------------------------------------------------------------------------|
| START BACK | (1,2)<br>STarT<br>Back  | GP, practice nurse or the local Physiotherapy Direct Access service (Physio Direct) referral to PT | PT assessment and risk stratification (SBST)                                   | PTs deliver risk-matched group care:<br>- All risk groups: Education + booklet <i>The Back Book</i> + video “Get Back Active”;<br>- Low risk: Single session (30 minutes) of minimal intervention (education + advice + reassurance);<br>- Medium risk: 30-minute session of education + standardized PT (exercise + manual therapy);<br>- High risk: Education + PIPT (CBT with traditional PT)                                                                                                                                                                                         | - Patients are advised to access their GP for ongoing care in the usual way or if their condition worsens.                                                                                                                                                   | - Low risk: after the initial education session;<br>- Medium risk: after a maximum of 6 sessions;<br>- High risk: after a maximum of 12 sessions. |
|            | (3,4)<br>IMPACT<br>Back | GPs referral to PT                                                                                 | GP risk stratification (SBST) + PT assessment of medium and high-risk patients | GPs deliver care to:<br>- Low risk: Single session of minimal intervention (education + reassurance + information on self-management). Pain medication if appropriate;<br>PTs deliver risk-matched group care:<br>- Medium risk: education + standardized PT (exercise + manual therapy);<br>- High risk: education + PIPT (CBT with traditional PT)                                                                                                                                                                                                                                     | - If needed, medium and high-risk patients referred for further investigations or secondary care.                                                                                                                                                            | - Low risk: after the initial education session;<br>- Medium risk: after a maximum of 6 sessions;<br>- High risk: after a maximum of 12 sessions. |
|            | (5)<br>Ireland          | GP or PT team refer to the Back Pain Clinic                                                        | PT assessment and risk stratification (SBST)                                   | PTs deliver risk-matched group care:<br>- Low risk: 1.5-hour small group session of education + exercise to promote active self-management;<br>- Medium risk: Four 90-minute group sessions (8-10 patients) of education + generic exercise over 4 weeks;<br>- High risk: Four 120-minute group sessions (4-6 patients) of exercise (as medium risk group) + problem solving approach + CBT to promote self-management                                                                                                                                                                   | Not reported                                                                                                                                                                                                                                                 | - Low risk: after the initial education session;<br>- Medium risk: after 12 weeks;<br>- High risk: after 12 weeks.                                |
|            | (6)<br>Denmark          | GPs referral to PT                                                                                 | GPs assessment + PT assessment and risk stratification (SBST)                  | PTs deliver risk-matched group care:<br>- All risk groups: Education (education + advice + reassurance + booklet similar to <i>The Back Book</i> )<br>- Low-risk: minimal intervention (education + advice + reassurance)<br>- Medium risk: individualized PT treatment + intervention focusing prevention of new LBP episodes<br>- High risk: individualized PIPT (CBT and/or behavioural techniques with traditional PT)                                                                                                                                                               | Not reported                                                                                                                                                                                                                                                 | Not reported                                                                                                                                      |
| SCOPiC     | (7-9)                   | GP or other HCP refer to the SCOPiC sciatica clinic                                                | PT assessment and risk stratification (SBST)                                   | PTs deliver risk-matched group care:<br>- Subgroup 1 (low risk): 30-minute sessions (advice + education + self-management support + sciatica booklet)<br>- Subgroup 2 (medium risk with score $\leq 3$ or high risk with score $\geq 2$ ): one 45-minute session + 30-minute sessions of individualised treatment (advice + reassurance + education + exercise + manual therapy + acupuncture + sciatica booklet)<br>- Subgroup 3 (medium risk with score =4 or high risk with score $\geq 3$ ): Referral to a fast-track care pathway at the primary/secondary care interface services. | - Subgroups 1 and 2: Patients are able to access other care via their GP.<br>- Subgroup 3: specialist spinal PT assessment + referral to imaging (MRI or alternative) + referral to specialist clinics services (orthopaedics, neurosurgery or pain clinic). | - Subgroup 1: after up to 2 sessions within 4 weeks;<br>- Medium risk: after up to 6 sessions within 6 to 12 weeks;<br>- High risk: not reported  |

|                                            |                     |                                                                                                      |                                                                                                                        |                                                                                                                                                                                                                                                                                                                                                                                                                                    |                                                                                                                                                                                                                                                                                                                                                                         |                                                                                             |
|--------------------------------------------|---------------------|------------------------------------------------------------------------------------------------------|------------------------------------------------------------------------------------------------------------------------|------------------------------------------------------------------------------------------------------------------------------------------------------------------------------------------------------------------------------------------------------------------------------------------------------------------------------------------------------------------------------------------------------------------------------------|-------------------------------------------------------------------------------------------------------------------------------------------------------------------------------------------------------------------------------------------------------------------------------------------------------------------------------------------------------------------------|---------------------------------------------------------------------------------------------|
| <b>MATCH</b>                               | (10,11)             | PCPs referral:<br>- Medium risk patients to PT or CAM<br>- High-risk patients to psychologist and PT | PCP assessment and risk stratification (SBST)                                                                          | PCPs deliver care to:<br>- Low risk: Reassurance + self-management recommendations + online DVDs<br>PTs or CAM professionals deliver care to:<br>- Moderate risk: Self-management recommendations + PT-led exercise and yoga. For patients not interested these treatments, refer to passive options (acupuncture, chiropractic or massage)<br>PTs and psychologists:<br>- High risk: PIPT and CBT (access to CBT is very limited) | Low and medium risk patients: Not reported<br>High-risk patients: Proactive follow-up within 2 weeks by PCPs                                                                                                                                                                                                                                                            | Not reported                                                                                |
| <b>TARGET</b>                              | (12–14)             | PCPs referral to PIPT                                                                                | PCP assessment and risk stratification (2-item Chronic Low Back Pain Questionnaire + SBST for patients in acute stage) | - PCPs deliver education and pain medication to high-risk patients<br>- PTs deliver PIPT (cognitive behavioural training, motivational interviewing, pain-coping skills and activity-based treatments that include graded activity and graded exposure)                                                                                                                                                                            | Not reported.                                                                                                                                                                                                                                                                                                                                                           | Not reported.<br>There are no limits placed on the duration of any therapies or treatments. |
| <b>BETTERBACK®</b>                         | (15–18)             | - Self-referral to the PHC PT rehabilitation clinics<br>- Referral from the PHC general practices    | PT assessment and risk stratification (SBST)                                                                           | PTs deliver treatment matched to functional impairments based on SBST results (BetterBack part 1):<br>- Individualised information + neuromusculoskeletal mobilisation techniques if indicated + exercise + patient education (brochure):<br>- Low-risk: 1-3 sessions<br>- Medium-risk: ≥4 sessions<br>- High-risk: ≥4 sessions with additional training + education with a behavioural approach.                                  | PT assessment and evaluation of treatment outcomes – if needed PT group based-care (BetterBack part 2):<br>- Group-based education: One 90-minute session (2-10 patients)<br>- Group training (6 weeks, 2x/week): graded training of posture, motor control and, if needed, range of movement exercises                                                                 | Not reported                                                                                |
| <b>Low Back and Radicular Pain Pathway</b> | (19,20)<br>National | GP, self-referral to a chiropractor, osteopath or PT and 111 telephone service                       | GP, chiropractor, osteopath or PT assessment and risk stratification (SBST)                                            | GP, chiropractor, osteopath or PT initial management:<br>- Advice + information + pain medication + PT core therapies (education + manual therapy + exercise) with a 2-week review.<br>- If no improvement, referral to TTP assessment + referral to imaging (if indicated) within 6 weeks.                                                                                                                                        | - If imaging concordant with structural cause of sciatica, referral to epidural injection or surgery (after 8-12 weeks)<br>- If non-concordant structural cause, referral to CPPP (12-18 weeks)<br>- If no improvement, referral to Specialist Pain Management Services (18 weeks) - Pain management programmes (physical, psychological and behavioural interventions) | Patients can be discharged at any point along the pathway upon improvement of the LBP.      |
|                                            | (21)<br>North       | GP referral or other first contact professional                                                      | GP or other first contact professional assessment and risk stratification (SBST)                                       | GP or other first contact professional initial management:<br>- Advice on self-management or referral to secondary care or referral to TTP<br>- If referral to TTP: assessment + referral to a combination of core therapies (education + manual therapy + exercise) or intensive CPPP (residential programme of intensive exercise + education + support with long-term self-management)                                          | - If not improved, referral for Pain Management Services and specialist spinal surgical options                                                                                                                                                                                                                                                                         | - After initial management<br>- After treatments: not reported                              |

|                              |                       |                                                        |                                                                                              |                                                                                                                                                                                                                                                                                                                                                                                                                                                                                                                                                                                                                         |                                                                                                                                                                                                                                                                                                            |                                                                                                                                   |
|------------------------------|-----------------------|--------------------------------------------------------|----------------------------------------------------------------------------------------------|-------------------------------------------------------------------------------------------------------------------------------------------------------------------------------------------------------------------------------------------------------------------------------------------------------------------------------------------------------------------------------------------------------------------------------------------------------------------------------------------------------------------------------------------------------------------------------------------------------------------------|------------------------------------------------------------------------------------------------------------------------------------------------------------------------------------------------------------------------------------------------------------------------------------------------------------|-----------------------------------------------------------------------------------------------------------------------------------|
|                              | (22,23)<br>North East | GP referral                                            | GP risk stratification (SBST) + referral to TTP                                              | GP deliver care to low-risk patients:<br>- Low risk: advice + education<br>TTP assessment and delivery of risk-matched group care:<br>- Referral to further investigations if necessary;<br>- Moderate to high risk: Core therapies (PT incorporating exercise, manual therapy or acupuncture) or CPPP (100-hour residential, combined physical and psychological therapies program for a small number of patients)                                                                                                                                                                                                     | Not reported                                                                                                                                                                                                                                                                                               | - Low-risk patients: after initial consultation                                                                                   |
| Beating Back Pain Service    | (24)                  | GP, PT or osteopath referral to BBPS                   | No assessment before group session                                                           | GP and occupational therapist deliver care to all patients<br>- 2h group session of education on pain and self-management + BBPS pack (booklet + CD with information and mobility and strength exercises) + SBST assessment + referral to combination of care according to patient preference (individualized combination of acupuncture, self-management groups and/or BBPS packs):<br>- Acupuncture: Up to 6 weekly sessions (30 minutes) of individualized TCM acupuncture treatment;<br>- Self-management groups: group sessions of education on self-management + goal setting + mindfulness + CBT.<br>- BBPS pack | Not reported                                                                                                                                                                                                                                                                                               | Not reported                                                                                                                      |
| North East Essex PCT service | (25)                  | GP referral to the manual therapy service              | GP assessment                                                                                | - GP deliver usual care (advice + reassurance + analgesia) to all patients for 4-6 weeks + referral to chiropractor/osteopath/PT according to patient preference.<br>- Chiropractor/Osteopath/PT care: Up to 6 sessions of manual therapy or additional treatments with GP approval                                                                                                                                                                                                                                                                                                                                     | If no improvements, referral to psychotherapy/CBT or referral to secondary care via GP recommendation (surgical/ radiological/ pain consultant)                                                                                                                                                            | - Discharge and referral back to GP after chiropractor/ Osteopath/PT care with a report of recommendations for further management |
| ISAEC                        | (26)                  | PCP referral to ISAEC (could order MRI)                | APC evaluation and stratification by pattern diagnosis                                       | APC deliver care according to clinical presentation patterns:<br>- Back dominant pattern (surgery unlikely): APC education and management (Physiatry/pain clinic, counselling, rheumatology, self-management, allied health management)<br>- Leg dominant (surgery likely): referral to spine surgeon (imaging, blocks, surgery, nonoperative)                                                                                                                                                                                                                                                                          | - Back dominant pattern (surgery unlikely): recommendations communicated to referring PCP.<br>- Leg dominant (surgery likely): APC education and management (Physiatry/pain clinic, counselling, rheumatology, self-management, allied health management) + recommendations communicated to referring PCP. | Not reported                                                                                                                      |
| Saskatchewan Spine Pathway   | (27)                  | Physician referral to SSP clinic                       | Patients triage into Group A (non-surgical management) or Group B (spine surgeon assessment) | - Group A: education including self-care instruction, medication advice and/or mechanical therapies<br>- Group B – surgical consultation (imaging and surgery)                                                                                                                                                                                                                                                                                                                                                                                                                                                          | - Group A: follow-up by the SSP clinic when required                                                                                                                                                                                                                                                       | - Group A: Discharge after care delivery<br>- Group B: Not reported                                                               |
|                              | (28)                  | - Group A: Referred by neurosurgeons at the SSP clinic | Physicians (at PHC) or specialized PTs (at SSP clinics) assessment                           | - Group A (SSP clinic): assessment (directly) or reassessment (from PHC referral) of pattern diagnosis + treatment according to SSP classification (pattern diagnosis). If patient improves, continue treatment in PHC.                                                                                                                                                                                                                                                                                                                                                                                                 | Group A: If no improvement:<br>- Pattern 1 e 2 – Refer back to PHC with recommendations for additional mechanical treatment and referral to                                                                                                                                                                | Not reported                                                                                                                      |

|                             |      |                                                                     |                                                                                  |                                                                                                                                                                                                                                                                                                                          |                                                                                                                                                                                                                                                                                                   |                                                                                                                                                         |
|-----------------------------|------|---------------------------------------------------------------------|----------------------------------------------------------------------------------|--------------------------------------------------------------------------------------------------------------------------------------------------------------------------------------------------------------------------------------------------------------------------------------------------------------------------|---------------------------------------------------------------------------------------------------------------------------------------------------------------------------------------------------------------------------------------------------------------------------------------------------|---------------------------------------------------------------------------------------------------------------------------------------------------------|
|                             |      | - Group B: Referred by physicians at primary care                   | If red flags present, referral for emergency (imaging + surgery consultation)    | - Group B (PHC referral): treatment according to SSP classification in PHC.<br><br>Treatment according to SSP classification:<br>- Pattern 1, 2 and 4: Reassurance + Advice and Information + Treatment schedule (position, movement, pharmacology and adjunct therapies)<br>- Pattern 3: Similar, but exclude exercise. | surgery if symptoms persist after 6 months;<br>- Pattern 3 – Urgent referral for imaging + surgery consultation if pain persist after 6 weeks;<br>- Pattern 4 – Non-urgent referral for imaging + surgery consultation.<br><br>Group B (PHC referral): If no improvement, referral to SSP clinic. |                                                                                                                                                         |
| Back pain Assessment Clinic | (29) | GP referral to Royal Melbourne Hospital + Surgeon's referral to BAC | Rheumatologist, neurosurgeon, orthopaedic spinal surgeon or APP (PTs) assessment | If BAC consultation:<br>- Referral to community treatment services (12-week community-based spinal rehabilitation programme seen within 2–4 weeks)<br>- Referral to rheumatology, orthopaedics, neurosurgery or pain services                                                                                            | - Outpatient specialist clinics consultations (Rheumatology, Orthopaedics, Neurosurgery, Pain services)                                                                                                                                                                                           | - To initial referrer after BAC assessment;<br>- After orthopaedics or neurosurgery consultations<br>- After community treatment services: Not reported |

**Abbreviations:**

APC - Advanced Practice Clinician; APP - Advanced Practice Physiotherapist; BAC – Back pain Assessment Clinic; BBPS – Beating Back Pain Service; CAM - Complementary and Alternative Medicine; CBT – Cognitive Behavioural Techniques; CCCP - Combined Physical and Psychological Therapies program; EBP – Evidence-Based Practice; GPs – General Practitioner; HCP – Health Care Provider; ISAEC – Inter-professional Spine Assessment and Education Clinics; LBP – Low Back Pain; MoC – Model of Care; NERBPP – North East Low Back and Radicular Pain Pathway; PCP – Primary Care Provider; PHC – Primary Healthcare; PIPT - Psychologically Informed Physical Therapy; PT – Physiotherapy; PTs – Physiotherapists; SBST – Start Back Screening Tool; SSP – Saskatchewan Spine Pathway; TCM – Traditional Chinese Medicine; TTPs - Triage and Treat practitioners;
